# 1 **Bacille Calmette-Guérin vaccine reprograms human neonatal lipid** 2 **metabolism *in vitro* and *in vivo***

3  
4 Joann Diray-Arce<sup>1,2,16,\*</sup>, Asimena Angelidou<sup>1,2,3</sup>, Kristoffer Jarlov Jensen<sup>4,5,6</sup>, Maria Giulia  
5 Conti<sup>1,7</sup>, Rachel S. Kelly<sup>8</sup>, Matthew A. Pettengill<sup>1,9</sup>, Mark Liu<sup>1</sup>, Simon D. van Haren<sup>1,2</sup>, Scott  
6 McCulloch<sup>10</sup>, Greg Michelloti<sup>10</sup>, the EPIC Consortium<sup>#</sup>, Tobias Kollmann<sup>11</sup>, Beate Kampmann<sup>12</sup>,  
7 Hanno Steen<sup>1,2,13</sup>, Al Ozonoff<sup>1,2</sup>, Jessica Lasky- Su<sup>8</sup>, Christine Stabell Benn<sup>3,5,14</sup>, Ofer Levy<sup>1,2,15,\*</sup>

8  
9 <sup>1</sup>*Precision Vaccines Program*, Division of Infectious Diseases, Boston Children's Hospital,  
10 Boston, Massachusetts, 02115, USA;

11 <sup>2</sup>Department of Pediatrics, Harvard Medical School, Boston, Massachusetts, 02115, USA;

12 <sup>3</sup>Department of Neonatology, Beth Israel Deaconess Medical Center, Boston, Massachusetts,  
13 02215, USA;

14 <sup>4</sup>Research Center for Vitamins and Vaccines (CVIVA), Bandim Health Project, University of  
15 Southern Denmark, 2300, Copenhagen, Denmark;

16 <sup>5</sup>Bandim Health Project, IN-DEPTH Network, 1004, Bissau, Guinea-Bissau;

17 <sup>6</sup>Experimental and Translational Immunology, Department of Health Technology, Technical  
18 University of Denmark, DK-2800 Kgs Lyngby, Denmark;

19 <sup>7</sup>Department of Maternal and Child Health, Sapienza University of Rome, 00185, Rome, Italy

20 <sup>8</sup>Channing Division of Network Medicine, Brigham and Women's Hospital and Harvard Medical  
21 School, Boston, Massachusetts, 02115, USA;

22 <sup>9</sup>Department of Pathology, Anatomy and Cell Biology, Thomas Jefferson University,  
23 Philadelphia, Pennsylvania, 19107, USA;

24 <sup>10</sup>Metabolon Inc. Morrisville, North Carolina, 27560, USA;

25 <sup>11</sup>Telethon Kids Institute, University of Western Australia, Perth, Western Australia, 6009,  
26 Australia;

27 <sup>12</sup>The Vaccine Centre, Faculty of Infectious and Tropical Diseases, London School of Hygiene  
28 and Tropical Medicine, London, WC1E 7HT, United Kingdom;

29 <sup>13</sup>Department of Pathology, Boston Children's Hospital, Boston, Massachusetts, 02115, USA;

30 <sup>14</sup>OPEN, Institute of Clinical Research, University of Southern Denmark, 5000, Odense C,  
31 Denmark;

32 <sup>15</sup>Broad Institute of MIT & Harvard, Cambridge, Massachusetts, 02142, USA;

33 <sup>16</sup>Lead contact

34 <sup>#</sup>The Expanded Program on Immunization (EPIC) Consortium

35  
36 \*Correspondence: [joann.arce@childrens.harvard.edu](mailto:joann.arce@childrens.harvard.edu), [ofer.levy@childrens.harvard.edu](mailto:ofer.levy@childrens.harvard.edu)

## 37 38 **Highlights**

- 39
- 40 • Neonatal BCG immunization generates distinct metabolic shifts *in vivo* and *in vitro*  
41 across multiple independent cohorts.
  - 42 • BCG induces prominent changes in concentrations of plasma lysophospholipids (LPLs)
  - 43 • BCG induced changes in plasma lysophosphatidylcholines (LPCs) correlate with BCG  
44 effects on TLR agonist- and mycobacterial antigen-induced cytokine responses.
  - 45 • Characterization of vaccine-induced changes in metabolism may define predictive  
46 signatures of vaccine responses and inform early life vaccine development.

47 Keywords: BCG vaccines, early life vaccinology, lipidomics, lysophospholipids, metabolomics,  
48 newborn immunity, systems vaccinology, vaccines  
49

50 **Summary**

51 Vaccines have generally been developed with limited insight into their molecular impact. While  
52 systems vaccinology, including metabolomics, enables new characterization of vaccine  
53 mechanisms of action, these tools have yet to be applied to infants at high risk of infection and  
54 receive the most vaccines. Bacille Calmette-Guérin (BCG) protects infants against disseminated  
55 tuberculosis (TB) and TB-unrelated infections via incompletely understood mechanisms. We  
56 employed mass spectrometry-based metabolomics of blood plasma to profile BCG-induced  
57 infant responses in Guinea Bissau *in vivo* and the U.S. *in vitro*. BCG selectively altered plasma  
58 lipid pathways, including lysophospholipids. BCG-induced lysophosphatidylcholines (LPCs)  
59 correlated with both TLR agonist- and purified protein derivative (PPD, mycobacterial antigen)-  
60 induced blood cytokine production *in vitro*, raising the possibility that LPCs contribute to BCG  
61 immunogenicity. Analysis of an independent newborn cohort from The Gambia demonstrated  
62 shared vaccine-induced metabolites such as phospholipids and sphingolipids. BCG-induced  
63 changes to the plasma lipidome and LPCs may contribute to its immunogenicity and inform the  
64 discovery and development of early life vaccines.

## 65 **Introduction:**

66 Infectious diseases are the leading cause of early life mortality worldwide, with ~2.5  
67 million newborns and infants dying from infections each year (World Health, 2020).  
68 Approximately 45% of deaths in children under five years of age occurred during the neonatal  
69 period, defined as the first 28 days of life (World Health, 2020). Immunization is a cost-effective  
70 public health intervention that reduces the risk of morbidity and averts ~2 to 3 million deaths  
71 every year. Protective responses to immunization in early life are different from those in older  
72 individuals, in part due to the distinct immune system of newborns and young infants (Dowling  
73 and Levy, 2014; Sanchez-Schmitz and Levy, 2011). Characterizing sex-, age- and antigen-  
74 specific responses is key to developing vaccines tailored for vulnerable populations such as the  
75 very young (Whittaker et al., 2018).

76  
77 Immunization at birth with live-attenuated *Mycobacterium bovis* vaccines, referred to as  
78 Bacille Calmette-Guérin (BCG), is recommended in countries with endemic tuberculosis (TB) to  
79 protect infants against miliary TB and tuberculous meningitis (Mangtani et al., 2014). Though  
80 there are no definite correlates of protection, some studies have linked BCG efficacy against TB  
81 to its ability to effectively induce Th1-polarized neonatal immune responses (Libraty et al., 2014;  
82 Marchant et al., 1999). Remarkably, across multiple studies, the administration of BCG in early  
83 life has been associated with a reduced incidence of unrelated ("off-target") infections. Such  
84 beneficial pathogen-agnostic ("heterologous") effects of BCG are hypothesized to reduce  
85 morbidity and mortality far beyond what is expected from prevention of the target disease- i.e.,  
86 TB (Higgins et al., 2016). For example, three consecutive randomized trials demonstrated that  
87 early administration of BCG to low birth weight newborns in Guinea-Bissau significantly  
88 reduced mortality by ~38% (17%-54%) (Biering-Sorensen et al., 2017). BCG pathogen-agnostic  
89 effects are still under investigation and may not be evident in all settings (Haahr et al., 2016;  
90 Kjaergaard et al., 2016); therefore, identifying high-risk populations may benefit most from BCG  
91 vaccination is an active area of research. The rapid beneficial effects of BCG in early life suggest  
92 that it may be mediated via innate immunity. The mechanisms mediating BCG protection are  
93 under active investigation (Curtis et al., 2020; Moorlag et al., 2019; Zimmermann et al., 2019),  
94 with recent evidence suggesting that induction of granulopoiesis may contribute to BCG-induced  
95 protection against off-target bacterial infections in early life (Brook et al., 2020).

96  
97 One potential mechanism for the heterologous effects of BCG is epigenetic  
98 reprogramming of human innate immune cells, i.e., trained immunity, resulting in altered innate  
99 immune responses upon rechallenge with heterologous stimuli in adults (Kleinnijenhuis et al.,  
100 2012). Systemic metabolic pathways have been implicated in the immune system regulation  
101 (Boothby and Rickert, 2017). A potential role for metabolism in the protective effects of BCG  
102 has been posited (Kelly and O'Neill, 2015). Training effects may be mediated by metabolites  
103 functioning as cofactors for epigenetic enzymes to induce chromatin and DNA modifications;  
104 upon rechallenge with a second stimulus that is unrelated to the first stimulus that induces  
105 training, trained cells can mount a more rapid and effective immune response (Netea et al.,  
106 2016). Changes in glucose, glutamine, and cholesterol metabolism maintain trained immunity  
107 through the provision of active intermediate metabolites (Fok et al., 2019). Vaccine-induced  
108 metabolic changes that contribute to trained immunity have been studied in adults. Still, the  
109 impact of the BCG vaccine on human neonatal metabolism has yet to be characterized  
110 (Kollmann, 2013). Given newborns' unique developmental physiology and nutritional/metabolic

111 needs compared to adults, vaccine-induced metabolic changes may be age-dependent (Angelidou  
112 et al., 2021; Conti et al., 2020).

113  
114 The human metabolome is influenced by physiologic or pathologic states and  
115 environmental factors, such as nutrition (Johnson et al., 2016; Playdon et al., 2017), and consists  
116 of by-products from signaling cascades. Metabolomics, the study of small molecules associated  
117 with physiologic conditions, has been used to identify active or dysregulated pathways (Guijas et  
118 al., 2018) in health and disease. Metabolites can define disease phenotypes and are often readily  
119 measured and applied to clinical settings (Johnson et al., 2016). Circulating metabolites can have  
120 immunomodulatory effects, and, conversely, immune activation can shape the plasma  
121 metabolome and predict future disease phenotypes (Diray-Arce et al., 2020; Pettengill et al.,  
122 2014). While several metabolites in neonatal monocytes and macrophages such as acetyl-  
123 coenzyme A and succinate play a role in the induction of epigenetic modulators, essential to  
124 trained immunity, much remains to be learned regarding the distinct neonatal  
125 immunometabolism (Arts et al., 2018; Conti et al., 2020; Kan et al., 2018; Reinke et al., 2013).  
126 We have recently demonstrated that mass spectrometry-based metabolomics can be applied to  
127 newborn plasma samples (Lee et al., 2019), and there is great interest in applying these powerful  
128 technologies to characterize neonatal vaccine responses (Amenyogbe et al., 2015; Hagan et al.,  
129 2015; Petrick et al., 2019). However, to date, no published systems vaccinology studies have  
130 assessed systemic metabolic responses of newborns to immunization.

131  
132 In this study, we examined the effects of neonatal BCG vaccination on the global  
133 metabolic profile in newborn blood plasma at four weeks of life. Subsequently, we investigated  
134 how BCG vaccination impacts the plasma lipidome and both antigen-specific and innate  
135 cytokine induction. We report that BCG vaccination induces metabolic shifts *in vivo* and *in vitro*,  
136 particularly in lysolipid pathways, including lysophosphatidylcholines (LPCs) that correlate with  
137 TLR agonist- and purified protein derivative (PPD, mycobacterial antigen)-induced whole blood  
138 cytokine responses. Our observations provide fresh insights into BCG's potential mechanisms of  
139 action, identify new candidate pathways and biomarkers that may inform optimization of its  
140 beneficial effects, and suggest that vaccine-induced metabolites are relevant to vaccine  
141 immunogenicity.

142  
143

144 **Results:**  
145 **BCG vaccination induced shifts in the infant plasma metabolome**  
146

147 To elucidate the impact of early BCG vaccination, plasma samples from *in vivo* and *in*  
148 *vitro* cohorts were subjected to comprehensive metabolomics analysis. Our primary *in vivo*  
149 cohort consisted of low birthweight newborns from Guinea-Bissau who were enrolled in a  
150 randomized clinical trial to receive BCG at birth (classified as early BCG) or at six weeks after  
151 birth (delayed BCG) (Biering-Sorensen et al., 2017). In an immunological study nested within  
152 the trial, capillary blood samples were collected four weeks after randomization (after BCG was  
153 given in the early BCG group and before BCG was given in the delayed BCG group) to  
154 investigate the effect of BCG on PPD antigen- and TLR-agonist-induced whole blood cytokine  
155 responses *in vitro* (Figure 1A) (Jensen et al., 2015). Catch-up vaccination followed at six weeks  
156 of life with Pentavalent vaccine (Penta) and oral polio vaccine (OPV) for the early BCG group  
157 and BCG, Penta, and OPV for the delayed BCG group (Figure 2A).  
158

159 After the primary analyses (Jensen et al., 2015), blood samples with the remaining  
160 plasma of sufficient volume were shipped to the *Precision Vaccines Program* (Boston, MA,  
161 USA) for subsequent assays. Study design, including the enrollment and randomization  
162 procedures and sample processing of the immunological sub-study, is outlined in Figure S1A-  
163 S1C. Characteristics of newborn study participants whose plasma was subjected to metabolomic  
164 profiling are described in Table S1.  
165

166 Ultrahigh performance liquid chromatography-tandem mass spectroscopy (UPLC-  
167 MS/MS) (*Metabolon*; Morrisville, NC, USA) was employed to identify and measure metabolites  
168 in the human newborn plasma (Evans et al., 2009). To ensure sufficient plasma volume for this  
169 assay, we pooled plasma samples of 10 participants stratified by sex and treatment prior to mass  
170 spectrometry analysis. Mass spectrometry peaks were identified based on their corresponding  
171 retention time/index (RI), mass to charge ratio (m/z), and chromatographic data compared with  
172 *Metabolon's* library of purified standards or recurrent unknown entities. To reduce the  
173 dimensionality of the data and identify the discriminative overview of the metabolomes  
174 classified by grouping, we conducted a supervised sparse Partial Least Square Discriminant  
175 Analysis (sPLS-DA). We extracted two components, Component 1 (Comp 1) and Component 2  
176 (Comp 2), which accounted for 15% and 11% of the variation, respectively (Figure 2B). The first  
177 two components elucidated distinct clustering between delayed BCG and early BCG, suggesting  
178 that early BCG immunization induced shifts in the plasma metabolome. The top 30 loadings  
179 identified metabolites associated with early BCG (orange) and delayed BCG (blue), including  
180 several glycerophospholipids (GPCs), increased in the early BCG group (Figure 2C).  
181

182 Of the 674 metabolites detected, 623 passed quality control and assurance. We focused  
183 on endogenous biochemicals in which 544 metabolites were included in the analysis (Figure  
184 S2A-E). Among these metabolites, 55 biochemicals (10.11%) demonstrated significantly  
185 differential abundance between the early vs. delayed BCG newborn groups ( $\alpha=0.05$ ) (Table  
186 S2, Figure 2E). A majority of significant metabolites belonged to the lipid superclass.  
187 Unsupervised hierarchical clustering of differentially abundant metabolites (DAMs) illustrated  
188 higher levels of lipid metabolites in the early BCG compared to the delayed BCG group. In

189 contrast, early vs. late BCG administration was associated with lower plasma amino acid  
190 concentrations (Figure 2D).

191

### 192 **BCG induced prominent shifts in plasma lipid pathways**

193 Compared to the delayed BCG group, early BCG administration was associated with  
194 distinct concentrations of a range of lipid pathways and metabolites. Of note, greater than half of  
195 the metabolites whose levels changed significantly ( $p < 0.05$ ) between the groups belonged to the  
196 lipid superclass (Figure 3A), and 39% of DAMs were of the lysophospholipid (LPL) subclass  
197 (Figure 3A). Early BCG administration was consistently associated with robust production of  
198 selected sphingolipid, monoacylglycerol, steroid, and LPL metabolites (Table S2). In contrast,  
199 palmitoylglycerols and pregnanediol disulfate (progesterin steroids) were decreased in the early vs.  
200 delayed BCG group (Figure 3B, Table S2).

201

202 We used pathway-based network reconstruction (implementation: *Metscape* plugin of  
203 *Cytoscape*) to construct a compound network providing a comprehensive overview of metabolic  
204 signatures to compare early vs. delayed BCG newborn groups (Figure 3C). As BCG  
205 administration at birth was associated with high production of lipid metabolites, our network  
206 demonstrated that glycerolipid pathways were interrelated and shared common nodes with other  
207 metabolic pathways (e.g., bile acid biosynthesis, galactose glycerophospholipid,  
208 glycosphingolipid, and linoleate metabolism). In addition, we utilized metabolite set enrichment  
209 analysis (MSEA), which takes into account the quantitative measurement of each metabolite and  
210 groups them into functionally related sets from a collection of predefined human metabolic  
211 pathways (Jia et al., 2014). Results from MSEA were consistent with observations from network  
212 reconstruction, suggesting a prominent role for lipids upon early BCG vaccination in newborns  
213 (Figure 3C, Table S3). Early BCG administration was associated with increased production of  
214 multiple metabolites of the glycosphingolipid and glycerophospholipids, including LPCs. In  
215 contrast, glycerol, phosphoethanolamines, and cortisol were decreased in the early vs. delayed  
216 BCG group.

217

218 To gain further insight into the effects of BCG on the infant plasma lipidome, we assayed  
219 the same *in vivo* samples (i.e., those characterized using the untargeted metabolomics platform)  
220 using Complex Lipid Panel LC-MS/MS-based lipidomics (Figure 4A). Across the 14 lipid  
221 classes identified by this assay, we identified a total of 963 lipids, with triacylglycerol (TAG)  
222 being the most abundant lipid subclass, followed by phosphatidylethanolamines (PEs) and  
223 phosphatidylcholine (Figure 4B). Separation of groups by the timing of BCG vaccination (early  
224 vs. delayed) accounted for 52% variance at Comp 1 and 15% at Comp 2 (Figure 4C). A total of  
225 30 lipids (3.1%) were significantly perturbed, comparing early vs. delayed BCG newborns  
226 (Figure 4D). Four free fatty acid components (FFA 20:0, 22:2, 22:4, 24:0) demonstrated  
227 increased concentration in the early BCG group. Early BCG administration was associated with  
228 decreased concentrations of most LPC metabolites except LPC (22:2), which was significantly  
229 increased. BCG immunization was associated with lower plasma concentrations of multiple lipid  
230 sub-pathway families, including lysophosphatidylethanolamines (LPEs 18:2, 20:3, 20:4, 22:4),  
231 monoacylglycerols (MAGs 12:0, 14:0, 16:0, 16:1, 18:1, 18:2, 18:3, 22:5, 22:6), phosphocholines  
232 (PCs 14:0/16:1 and 16:0/22:2), PEs (18:0/22:2, 18:1/22:0, and 18:2/16:1) and TAGs (TAG44:0-  
233 FA18:0, TAG53:5-FA18:3, and TAG56:6/FA22:4) (Table S4).

234

235 **BCG induced metabolic signatures *in vitro* mirror those induced by early BCG vaccination**  
236 ***in vivo***

237  
238 We hypothesized that BCG-induced metabolic signatures detected *in vivo* could be  
239 modeled *in vitro*. To this end, we obtained human cord blood from a Boston newborn cohort  
240 (full-term newborns delivered via cesarean section) and assessed responses utilizing a whole  
241 blood assay (WBA) (Figure 1B) (Angelidou et al., 2020a). The WBA features multiple  
242 advantages, including (a) utilization of small volumes of minimally perturbed primary  
243 leukocytes, (b) the presence of autologous plasma, a rich source of age-specific  
244 immunomodulatory components (e.g., maternal antibodies, adenosine, etc.) (Pettengill et al.,  
245 2014), and (c) the ability to model and analyze responses of each participant to multiple  
246 conditions such as vehicle control and BCG-stimulation. WBA-derived supernatants (90%  
247 plasma v/v) were subjected to high-throughput metabolomics and complex lipid panel lipidomics  
248 (WBA; Figures S1B and 1B). Untargeted metabolomics detected 568 metabolites and analyzed  
249 437 metabolites after quality control and assurance and filtering out the xenobiotics to focus on  
250 endogenous metabolites (Figure S2F-J). BCG-only samples (i.e., no blood) at low and high  
251 dilution were also assayed as additional controls to assess background and identify metabolites  
252 produced by the BCG vaccine itself (Figure S3A). BCG-only controls demonstrated lower  
253 measurable concentrations in most lipid families (Figure S3B). Also, they had a lower number of  
254 detected lipids (Figure S3C) compared to cord blood stimulated with vehicle or with BCG.  
255 Matched pairs or pairwise comparisons of samples from the same participant were used for  
256 analysis.

257  
258 Principal component analysis (PCA) of metabolites detected in plasma from the *in vitro*  
259 stimulation assay illustrated that BCG treatment induced changes in the plasma metabolome  
260 (Figure 5A). Hierarchical clustering demonstrated the grouping of metabolite levels by treatment  
261 (Figure 5B). Metabolite set enrichment analysis (MSEA) using relative metabolite  
262 concentrations from the Boston *in vitro* cohort identified the glucose-alanine cycle, lactose  
263 degradation pathway, and sphingolipid metabolism as the top enriched pathways after BCG  
264 stimulation (Figure 5C). Metabolites that significantly differed between BCG-stimulated vs.  
265 control conditions *in vitro* included 25 upregulated metabolites and 77 down-regulated  
266 metabolites (Figure 5D, Table S5). A comparison between the *in vivo* Guinea Bissau and the *in*  
267 *vitro* Boston cohorts revealed 47 shared enriched metabolic pathways, representing a 58%  
268 overlap (Figure 7A). The number of unique pathways identified in BCG-stimulated samples *in*  
269 *vitro* (19 pathways: 23.5%) was slightly higher than that in the early BCG group *in vivo* (15  
270 pathways: 18.5%) (Figure 7A). Our results suggest more acute metabolic changes detected *in*  
271 *vitro* (18 hr post-BCG stimulation) than four weeks post *in vivo* BCG vaccination.

272  
273 Lipidomic analysis of supernatants from whole blood stimulated with BCG *in vitro*  
274 identified 963 lipids belonging to 15 families. Among those, only 75 lipids (7.6%) were  
275 significantly perturbed, with most lipids decreased upon BCG stimulation (Figure 4E). BCG  
276 stimulation induced a decrease of several plasma phospholipids metabolism intermediates, such  
277 as choline phosphate, glycerophosphocholine (GPC), and phosphoethanolamine (PE) (Table S7).  
278 Similar to total metabolic changes, more acute differences were noted for lipids stimulated *in*  
279 *vitro* (18 hr stim) compared to *in vivo* (4 weeks post-vaccine), possibly reflecting differences in  
280 the kinetics of BCG-induced lipid changes (Figure 4F). Multiple LPC components (LPC 16:0,



281 18:2, 20:4, 22:6) and other lipids were also decreased in BCG-stimulated samples *in vitro*  
282 (Figure 4G).

283  
284 Previous studies have assessed the role of fatty acids and the eicosanoid pathway in Mtb  
285 infection and BCG vaccine efficacy (McFarland et al., 2008). Eicosanoids are a family of lipid  
286 mediators involved in inflammation (Figure S3F). Prostaglandin E<sub>2</sub> (PGE<sub>2</sub>) was significantly  
287 increased upon BCG stimulation (Figure S3D), while we observed a significant reduction in  
288 docosahexaenoic acid (DHA 22:6 (n-3)) (Figure S3E) in BCG-stimulated samples vs. control.  
289 Linoleic acid (FFA 18:2) and arachidonic acid (FFA (20:4)), an immediate precursor of PGE<sub>2</sub>  
290 (Figure S3G-H), were both decreased in BCG-stimulated samples compared to control. PGs were  
291 not detected in the Guinea-Bissau *in vivo* cohort (Table S2). However, the time points were  
292 markedly different – i.e., 4 weeks after BCG *in vivo* vs. 18 hours *in vitro*, suggesting an acute  
293 inflammatory role for PGs rather than a contribution to a prolonged metabolic response.

294  
295 **BCG-induced plasma lysophospholipids *in vivo* at 4 weeks post-vaccination correlated with**  
296 ***in vitro* TLR agonist and mycobacterial antigen-induced cytokine/chemokine responses**

297  
298 Lysophosphatidylcholine (LPC) is a critical component of low-density lipoprotein, and  
299 high LPC levels have been associated with various diseases (Law et al., 2019; Okita et al., 1997).  
300 LPC modulates immune responses by controlling distribution, trafficking, and activation of  
301 leukocytes (Chiurchiù et al., 2018) and is a candidate sepsis treatment (Yan et al., 2004). In our  
302 study, early BCG vaccination perturbed levels of several LPC components 4 weeks post-  
303 vaccination *in vivo* (Figure 6A-F). Early BCG administration was associated with significantly  
304 increased plasma concentrations of LPC16:0 and LPC18:0 and decreased concentrations of  
305 LPC18:2, -20:3, -20:4 and -22:6.

306  
307 The immunogenicity of BCG in the Guinea-Bissau *in vivo* cohort, as measured by whole  
308 blood cytokine responses to PPD antigen and TLR-agonist stimulation, has been previously  
309 reported (Jensen et al., 2015). To study the relationship between BCG-induced LPLs *in vivo*  
310 and recall cytokine production *in vitro*, we analyzed previously generated cytokine  
311 measurements on PPD and other TLR agonist recall responses for the subset of newborn  
312 participants included in our metabolomic and lipidomic studies. Relative to the delayed BCG  
313 cohort, newborns who received early BCG demonstrated increased PPD-induced production of  
314 TNF $\alpha$  (p=0.0072), IL5 (p<0.0001), IL6 (p=0.0229), IL17 (p<0.0001), and IFN $\gamma$  (p<0.0001)  
315 (Figure S4A-G, Table S6). Significant correlations were noted between concentrations of LPC  
316 species (LPC 14:0, 16:0, 17:0, 18:0, 18:1, 18:2, 20:1, 20:2, 20:4) and cytokines IL5, IL6, IL10,  
317 TNF $\alpha$ , IL17 and IFN $\gamma$  (Figure 6G-H). Multiple LPCs (LPC 22:5, 17:0, 16:1, 15:0) positively  
318 correlated with TLR4- and TLR7/8-mediated IL6 production, while LPCs 20:1, 20:0, 18:0 and  
319 16:0 negatively correlated with TLR2/1-mediated IL6 production. Multiple LPCs (LPCs 20:4,  
320 20:0, 19:1, 17:0, 14:0) also positively correlated with TLR2/1-, TLR7/8-mediated as well as  
321 PPD-induced IL10 production. In particular, LPC 18:0 was positively correlated with PPD-  
322 induced IL10 production. These observations raise the possibility that alterations in LPLs, lipids  
323 with known roles in immune regulation and responses to mycobacterial infection (Lee et al.,  
324 2018), may contribute to BCG immunogenicity.

325

326 To determine the response to stimulation with BCG *in vitro*, we subjected WBA  
327 supernatants to multiplex cytokine and chemokine profiling (Figures S1B and 1B). BCG  
328 stimulation of cord blood for 18 hr significantly induced the production of multiple cytokines  
329 and chemokines, resulting in a balanced Th1-, Th2-, and Th17-polarizing cytokine profile  
330 (Figure S5A). Consistent with previously reported acute activation of BCG-induced Th1  
331 responses (Angelidou et al., 2020a) and early proinflammatory bias (Freyne et al., 2018), the  
332 addition of BCG to whole blood *in vitro* induced IL-1 $\beta$ , a cytokine that may be important to  
333 BCG vaccine immunogenicity (Scheid et al., 2018) and innate training that may contribute to  
334 non-specific/pathogen-agnostic beneficial effects (Arts et al., 2018) (Figure S5B). BCG also  
335 induced the production of anti-inflammatory IL-10 (Figure S5B). As expected, these plasma  
336 cytokines were not detected *in vivo* at the 4-week time point, given likely normalization to  
337 baseline 4-weeks after vaccination (Stenken and Poschenrieder, 2015).

### 338 339 **Comparison of BCG-induced metabolic profiles across cohorts demonstrates modulation of** 340 **common metabolomic pathways**

341  
342 To validate metabolomic signatures of the BCG vaccine in early life, we compared the  
343 Guinea-Bissau and Boston cohorts with another independent newborn group from the EPIC-001  
344 study in The Gambia (West Africa) using high-throughput metabolomics. Newborns (n=27) were  
345 assigned to either receive the Expanded Program on Immunization (EPI) vaccines (OPV, BCG,  
346 and HBV) at birth or delayed during the first week of life to study the effect of vaccine responses  
347 on early life immune ontogeny (Figure 1C, Figure S1C) (Lee et al., 2019). Peripheral blood was  
348 collected at two time points: a pre-vaccination sample at the day of life 0 (DOL0; birth), then a  
349 second sample randomized at either DOL1, DOL3, DOL7. All enriched metabolite sets  
350 discovered in the EPI-vaccinated Gambia cohort were shared among the Guinea-Bissau and  
351 Boston cohorts suggesting that BCG-induced metabolic pathways followed a consistent pattern  
352 (Figure 7A, 7C, 7D). Shared sets of BCG-induced metabolic changes included sphingolipid  
353 metabolism, glycine and serine metabolism, methionine metabolism, purine metabolism,  
354 galactose metabolism, bile acid biosynthesis, amino sugar metabolism, lactose synthesis,  
355 spermidine and spermine biosynthesis, and betaine metabolism (Figure 7D). The variety and  
356 abundance of such BCG-modulated pathways are consistent with newborns' complex metabolic  
357 and bioenergetic needs. LPLs belonging to phospholipid biosynthesis metabolite enriched sets  
358 demonstrated perturbation across all three cohorts. While a more significant number of  
359 downregulated metabolites were noted following BCG-stimulation *in vitro*, both West African *in*  
360 *vivo* cohorts (Guinea Bissau and The Gambia) displayed similar metabolic trends, suggesting  
361 similar metabolome profiles within this geographic region (i.e., West Africa; Figure 7B). Of  
362 note, ~70% of significant metabolites in Gambian neonates belonged to the lipid class (Table  
363 S8), supporting a major lipid signature of BCG vaccination early in life.

364  
365  
366

## 367 Discussion

368

369 Herein we present the first characterization of BCG-induced changes to the human  
370 newborn plasma metabolome. Prior studies of the neonatal plasma metabolome have used  
371 umbilical cord blood for metabolomic profiling (Fanos et al., 2013; Mussap et al., 2013) due to  
372 limitations in the number and quantity of neonatal blood draws. To our knowledge, the sole  
373 exception is our prior study of immune ontogeny that assessed plasma metabolites from the  
374 human peripheral newborn blood plasma (Lee et al., 2019). Herein, we employed plasma  
375 metabolomics to define BCG-induced metabolic changes in three independent newborn cohorts,  
376 two *in vivo* (Guinea Bissau and The Gambia; West Africa) and one *in vitro* (Boston, MA: USA).  
377 To our knowledge, our effort represents the first application of metabolomics to characterize  
378 vaccine action in newborns, who exhibit distinct immunity and are at the greatest risk of  
379 infection (Whittaker et al., 2018).

380

381 Human *in vitro* assays are a promising approach to characterize vaccine action and  
382 generate data with relevance *in vivo* (Dowling and Levy, 2014; Sanchez-Schmitz et al., 2018).  
383 Using a whole blood stimulation assay, we were able to recapitulate metabolic changes induced  
384 by early BCG vaccination and identify additional candidate biomarkers of early BCG  
385 immunization in newborns. Systems vaccinology studies have demonstrated overlap between  
386 vaccine-induced systems biology signatures *in vivo* and those detected by WBA *in vitro* (Diray-  
387 Arce et al., 2021; Lee et al., 2019; Li et al., 2017; Nakaya et al., 2016; Nakaya et al., 2011; White  
388 et al., 2012). A recent study assessed the impact of neonatal BCG administration on clinical  
389 outcomes and epigenetic and cytokine responses in peripheral blood mononuclear cells  
390 (PBMCs). Still, it did not examine metabolomic signatures (Prentice et al., 2021). Neonates  
391 typically exhibit Th2-polarized immune responses (Dela Pena-Ponce et al., 2017), but the live  
392 attenuated BCG vaccine engages multiple PRRs and induces balanced Th1/Th2 responses in the  
393 early life (Marchant et al., 1999; Sanchez-Schmitz et al., 2018). Given the vital role of  
394 metabolism in immunity and the unique metabolic state of newborns, we sought to explore how  
395 BCG given at birth affects the newborn plasma metabolome. We showed that neonatal BCG  
396 vaccination perturbs plasma lipid pathways in a reproducible pattern. Interestingly, metabolic  
397 changes correlated with *in vitro* cytokine and chemokine responses of whole blood to innate  
398 (TLR agonist) and adaptive (PPD antigen) stimuli.

399

400 A remarkable feature of our results is that early administration of BCG appeared to re-  
401 model the plasma lipidome, shifting concentrations of LPLs such as LPCs and GPCs. LPCs are  
402 quickly metabolized by lysophospholipases to GPCs, which could explain our observation of  
403 decreasing plasma LPCs and increasing GPCs in our early BCG dataset (Figure 2C and 4G).  
404 Interestingly, a consistent decrease in plasma GPCs has been observed in sepsis vs. non-infected  
405 patients with systemic inflammatory response syndrome (SIRS)(Langley et al., 2013) while  
406 exogenous stearyl-GPC improved sepsis outcomes in mice (Yan et al., 2004). Our results thus  
407 raise the possibility that BCG-induced increases plasma GPCs may contribute to pathogen-  
408 agnostic protection against sepsis and respiratory infections in early life.

409

410 Lipid metabolism is key to cell membrane structure and function, including in that of  
411 leukocytes (Lochner et al., 2015), and has been proposed to contribute to vaccine-induced  
412 epigenetic reprogramming of immune responses (Netea et al., 2016; O'Neill et al., 2016). We

413 noted that BCG immunization induced a decrease in plasma concentrations of most of the LPLs  
414 detected. These findings were validated in our *in vitro* assay. Prominent among the plasma LPLs  
415 whose concentrations changed after BCG administration were LPCs. Bioactive products of  
416 phospholipase-mediated removal of fatty acids from phosphatidylcholine, LPCs are plasma  
417 constituents that can act directly on cell membranes and signal via protein G protein-coupled  
418 receptors or TLRs (Sharma et al., 2020), thereby exerting a range of immunologic effects  
419 (Knuplez and Marsche, 2020; Sharma et al., 2020). LPCs such as LPC 18:1 and 16:0 can  
420 modulate neutrophil reactive oxygen production (Ojala et al., 2007), promote TLR signaling,  
421 enhance the generation of mature dendritic cells (DCs) from differentiating human monocytes as  
422 well as enhance antigen-specific cytotoxic T cell and antibody responses *in vivo* (Knuplez and  
423 Marsche, 2020; Perrin-Cocon et al., 2006). At baseline, newborn plasma contains relatively high  
424 concentrations of LPC (20:4) and PC (36:4), but the plasma phospholipid profile changes  
425 markedly over time in a manner dependent on the dietary fatty acid composition (Uhl et al.,  
426 2016).

427  
428 In our study, BCG-induced changes in LPCs correlated with blood cytokine responses to  
429 stimulation with multiple TLR agonists and mycobacterial antigen (PPD) (Figure 6G-6H).  
430 Interestingly, potential pro-inflammatory effects of BCG vaccination may be counterbalanced by  
431 enhanced production of LPC 16:0, an LPC that was increased in our *in vivo* cohort (Figure 6A).  
432 LPC 16:0 can act as an "eat-me" signaling target, enhancing uptake of apoptotic cells (Soehnlein  
433 et al., 2009), as well as regulating the production of TNF and nitric oxide (NO) (Yan et al.,  
434 2004). The kinetics of BCG-induced LPC 16:0 production remains to be defined, but to the  
435 extent that our *in vitro* studies reflect kinetics *in vivo*, they may not initiate until after the first  
436 day of vaccination. LPC can function as a dual-activity ligand molecule triggering a classical  
437 proinflammatory phenotype by activating TLR4 and TLR2/1 mediated signaling on human  
438 embryonic cells (Carneiro et al., 2013). LPC species are also regulators of the innate immune  
439 response preventing excess inflammation and limiting mycobacterial survival in the host (Lee et  
440 al., 2018). Dual immunologic roles of LPCs have also been observed in mice wherein LPC  
441 increased production of antimicrobial agents ROS and NO while inducing IL10 in Mtb-infected  
442 macrophages, thereby enhancing macrophage-based host defense while avoiding excessive  
443 production of pro-inflammatory cytokines (Lee et al., 2018). Of note, LPCs have been explored  
444 as novel immunomodulatory agents. Indeed, systemic administration of LPC protected mice  
445 against experimental sepsis-induced lethality, enhanced clearance of bacteria, and inhibited the  
446 production of pro-inflammatory cytokines TNF $\alpha$  and IL1 $\beta$  (Lee et al., 2018). Overall, BCG  
447 modulation of plasma LPCs may fine-tune immune responses to shape cellular immunity to BCG  
448 antigens, enhance antimicrobial activity and avoid anti-inflammatory responses.

449  
450 In addition to our observations regarding BCG-induced changes in LPCs, BCG uptake by  
451 the host can trigger several other lipid pathways, such as PGE<sub>2</sub> production from the eicosanoids  
452 (Almeida et al., 2009). Eicosanoids regulate macrophage death and participate in several cellular  
453 pathways that either promote or inhibit inflammation (Behar et al., 2010). PGE<sub>2</sub> induces  
454 apoptosis of infected macrophages, a process that triggers the activation of DCs and subsequent  
455 enhancement of T cell responses crucial for optimal vaccine effectiveness and protection (Behar  
456 et al., 2010). In stark contrast to BCG (*M. bovis*) and attenuated Mtb strains, virulent Mtb strains  
457 are weaker PGE<sub>2</sub> inducers and induce necrosis of infected macrophages, enabling innate immune  
458 evasion and delay in initiation of adaptive immunity (Behar et al., 2010; Chen et al., 2008).

459 Upon stimulation of human newborn blood with BCG *in vitro*, we noted a significant increase in  
460 PGE<sub>2</sub> and arachidonate acid (FFA (20:4)), an immediate precursor of prostaglandin E<sub>2</sub> (PGE<sub>2</sub>).  
461 Possibly due to their short half-life, PGs were not detected 4 weeks after BCG immunization in  
462 the Guinea-Bissau *in vivo* cohort.

463  
464 Differences in FFA composition between conditions (BCG stimulated vs. control) for  
465 both our *in vivo* and *in vitro* cohorts were consistent with previous studies suggesting vaccine-  
466 induced alterations in membrane remodeling and lipid metabolism (Diray-Arce et al., 2020; Li et  
467 al., 2017). Alternatively, they may reflect nutritional differences or represent the distinct  
468 metabolic needs of the newborn between DOL0 when cord blood was obtained for the *in vitro*  
469 assay and DOL28, the time point at which peripheral blood was collected from the *in vivo* cohort  
470 (Conti et al., 2020).

471  
472 Vaccine interactions are increasingly recognized in systems vaccinology, and a growing  
473 body of literature suggests that the nature of the vaccine stimulus (live attenuated vs. killed or  
474 inactivated), as well as the order in which vaccines are administered, matters for their net off-  
475 target effects (Blok et al., 2020; Clipet-Jensen et al., 2021; Higgins et al., 2016; Li et al., 2020;  
476 Sorup et al., 2016; Thysen et al., 2019; Welaga et al., 2017). In our cohort, early BCG was given  
477 together with OPV, another live attenuated vaccine given at birth in developing countries, shown  
478 to confer mortality benefits from infectious causes (Andersen et al., 2018; Lund et al., 2015).  
479 Even though BCG and OPV could not be studied separately, analysis of the parent trial with  
480 complete follow-up vs. after censoring for national OPV campaigns yielded similar mortality  
481 benefits for the early BCG (Biering-Sorensen et al., 2017). Delayed BCG was given with OPV  
482 and Penta, a combination of inactivated vaccines including DTP, per the GB national  
483 immunization schedule. Studies comparing the clinical and immunologic effects of different  
484 sequences of vaccines are needed to assess the off-target effects of EPI vaccinations, avoid any  
485 undesirable negative effects on mortality and fully leverage beneficial pathogen-agnostic effects  
486 for clinical benefit.

487  
488 BCG strain differences may also partially account for some differences observed between  
489 the *in vitro* (BCG-Tice) and *in vivo* (BCG-SSI) cohorts (Angelidou et al., 2020b). However, the  
490 effect of BCG on LPL plasma concentrations was similar (consistent decrease both *in vivo* and *in*  
491 *vitro*) regardless of strain. Even though our study was not specifically designed to address BCG  
492 strain differences, future studies should make an effort to incorporate *in vitro* testing of BCG  
493 strains administered *in vivo*. In addition, human vaccine trials testing BCG-induced pathogen-  
494 specific and -agnostic protection should adopt study designs amenable to head-to-head strain  
495 comparisons in order to detect actionable differences in vaccine efficacy and immune signatures  
496 (Comstock, 1988).

497  
498 Our study features a number of strengths, including (a) a focus on human immune  
499 responses to BCG, one of the most commonly given vaccines across the globe that is critical to  
500 newborn health and is also being studied for potential benefits in protecting against viral  
501 infection and auto-immune diseases (Arts et al., 2018; Diray-Arce et al., 2020; Faustman, 2020;  
502 Moorlag et al., 2020); (b) novel application of state-of-the-art plasma metabolomic and lipidomic  
503 technologies to characterize BCG responses in vulnerable newborn cohorts in low income  
504 settings (West Africa); (c) study of multiple independent cohorts *in vivo* and *in vitro*; (d)

505 identification of lipids and in particular LPLs/LPCs as key metabolites altered by BCG; (e)  
506 significant correlation of LPCs with innate (TLR agonist) and adaptive (PPD) cytokine  
507 responses; and (f) validation of BCG-induced metabolic signatures across three independent  
508 cohorts in West Africa (Guinea Bissau and The Gambia; *in vivo*) and North America (Boston,  
509 USA; *in vitro*). Overall, by demonstrating the applicability of metabolomics in vulnerable  
510 newborns from resource-poor settings and defining novel candidate biomarkers that may  
511 contribute to BCG's protective effects, our study represents an important advance in the field of  
512 neonatal systems vaccinology.

513  
514 Our study also has several limitations, including (a) limited blood sample volumes from  
515 newborns necessitating pooling of samples by sex and treatment prior to metabolomic and  
516 lipidomic analyses, (b) a relatively high neonatal mortality in the early BCG trial so that some  
517 selection bias may have occurred, as we were only able to assess those who survived to 4 weeks  
518 of age, and (c) a possibility for false-positive findings for the Guinea-Bissau samples, as we  
519 chose not to adjust for multiple comparisons (Rothman, 1990). Regarding the latter, many false  
520 discovery rate (FDR) methods are considered too stringent for metabolomics analysis due to the  
521 high correlation and redundancy between metabolite features, resulting in a lack of agreed-upon  
522 standards in the field. We mitigated FDR concerns by validating our findings using a human  
523 newborn *in vitro* system and cross-comparison with a second independent Gambian newborn  
524 cohort studied *in vivo* to model BCG-induced metabolic shifts. Finally, BCG may induce a wider  
525 variety of metabolic pathways, and future studies are required to identify their significance and  
526 functional relation to immunogenicity and protection, as well as their correlation with other  
527 systems biology ("omic") measures such as systems serology (Ackerman et al., 2017).

528  
529 In summary, we have demonstrated the feasibility of assessing neonatal plasma  
530 metabolites in a resource-poor setting to identify vaccine-induced metabolic pathways in this  
531 study. BCG-induced alterations in LPLs, especially LPCs known to have roles in immune  
532 regulation and response to infection (Carneiro et al., 2013), were particularly pronounced and  
533 correlated with innate (TLR agonist) and adaptive (PPD) cytokine responses, suggesting that  
534 LPCs may contribute to BCG immunogenicity. These lipid biomarkers are novel candidates for  
535 correlates of protection that may contribute to BCG's specific (vs. TB) and heterologous  
536 protective effects. Overall, our study suggests that vaccine-induced metabolites, and especially  
537 lipids, may be relevant biomarkers of vaccine immunogenicity that may help inform more  
538 precise discovery and development of vaccines.

539  
540  
541

542 **STAR Methods**

- 543 • **KEY RESOURCES TABLE**
- 544 • **CONTACT FOR REAGENT AND RESOURCE SHARING**
- 545 • **EXPERIMENTAL MODEL AND SUBJECT DETAILS**
- 546 ○ **Newborn cohort characteristics and sample preparation**
- 547     ▪ Guinea-Bissau *in vivo* infant cohort receiving BCG at birth or delayed.
- 548     ▪ Boston newborn cohort stimulated *in vitro* with BCG or saline control.
- 549     ▪ Gambian *in vivo* cohort receiving EPI vaccines (BCG, HBV, OPV) at
- 550         birth or delayed
- 551 • **METHOD DETAILS**
- 552 ○ **Global Untargeted Metabolomics Profiling**
- 553 ○ **Complex Lipid Platform Lipidomics**
- 554 ○ ***In vitro* stimulation of blood derived from early- vs. delayed-BCG infants**
- 555 **with TLR agonists and mycobacterial antigen purified protein derivative**
- 556 **(PPD) to assess cytokine responses**
- 557 • **QUANTIFICATION AND STATISTICAL ANALYSIS**

558

559

560 **KEY RESOURCES TABLE**

| REAGENT or RESOURCE                                 | SOURCE                                       | IDENTIFIER                                                         |
|-----------------------------------------------------|----------------------------------------------|--------------------------------------------------------------------|
| <b>Chemicals, Peptides and Recombinant Proteins</b> |                                              |                                                                    |
| Bacille Calmette-Guérin Vaccine (BCG)               | Statens Serum Institute, Copenhagen, Denmark | Strain 1331                                                        |
|                                                     | Merck, USA                                   | TICE                                                               |
| Hepatitis B Vaccine (HBV)                           | Recombivax                                   | NDC#: 0006-4981-00                                                 |
| Lipopolysaccharide (LPS)                            | Sigma-Aldrich                                | From E. coli serotype                                              |
| Phosphate Buffered Saline (PBS)                     | Gibco, Life Technologies                     | Cat#: 10010023                                                     |
| Roswell Park Memorial Institute (RPMI) medium       | Gibco, Life Technologies Europe BV           | RPMI-1640 void of L-Glutamine                                      |
| Sodium pyruvate (Na-pyruvate)                       | Lonza, Copenhagen, Denmark                   | Cat#: 13-115E                                                      |
| L-Glutamine-Penicillin-Streptomycin                 | Gibco, Life Technologies                     | Cat#: 10378016                                                     |
| Purified protein derivative (PPD)                   | Statens Serum Institute, Copenhagen, Denmark | From M. tuberculosis Tuberculin PPD RT23 “SSI”                     |
| Adenosine deaminase assay kit                       | Diazyme Laboratories, Poway, CA              | Cat#: DZ117A-K                                                     |
| Lysophosphatidylcholine (LPC) kit                   | MyBioSource                                  | Cat#: MBS2700657                                                   |
| TLR 7/8 agonist                                     | Invivogen                                    | R848 (Resiquimod)<br>Cat#: tlr1-r848                               |
| Methanol                                            | Applied Biosystems, ThermoFisher             | Cat#: 400470                                                       |
| Ammonium acetate                                    | Invitrogen                                   | Cat#: AM9070G                                                      |
| Dichloromethane                                     | Applied Biosystems, ThermoFisher             | Cat #: 402152                                                      |
| Luminex Kit                                         | Invitrogen/Life Technologies, Carlsbad, CA   | Consists of 41 analytes including Th1-, Th2-, and Th17- cytokines, |

|                                          |                                                                                                                                                                           |                                      |
|------------------------------------------|---------------------------------------------------------------------------------------------------------------------------------------------------------------------------|--------------------------------------|
|                                          |                                                                                                                                                                           | chemokines and hematopoietic factors |
| <b>Deposited Data</b>                    |                                                                                                                                                                           |                                      |
|                                          | ImmPort                                                                                                                                                                   | SDY1709, SDY1256                     |
| Experimental Model:<br>Organisms/Strains | HMDB                                                                                                                                                                      | Version 5.0                          |
| <b>Software</b>                          |                                                                                                                                                                           |                                      |
| GraphPad Prism                           | Graphpad Software                                                                                                                                                         |                                      |
| R                                        | <a href="https://www.r-project.org">https://www.r-project.org</a>                                                                                                         | 3.5.1 Feather Spray                  |
| R studio                                 | <a href="https://www.rstudio.com/">https://www.rstudio.com/</a>                                                                                                           | 1.1.463                              |
| RFmarkerdetector                         | <a href="https://cran.r-project.org/web/packages/RFmarkerDetector/RFmarkerDetector.pdf">https://cran.r-project.org/web/packages/RFmarkerDetector/RFmarkerDetector.pdf</a> | 1.0.1                                |
| e1071                                    | <a href="https://cran.r-project.org/web/packages/e1071/index.html">https://cran.r-project.org/web/packages/e1071/index.html</a>                                           | 1.7-0                                |
| dplyr                                    | <a href="https://cran.r-project.org/web/packages/dplyr/dplyr.pdf">https://cran.r-project.org/web/packages/dplyr/dplyr.pdf</a>                                             | 0.7.8                                |
| plyr                                     | <a href="https://cran.r-project.org/web/packages/plyr/plyr.pdf">https://cran.r-project.org/web/packages/plyr/plyr.pdf</a>                                                 | 1.8.4                                |
| RcolorBrewer                             | <a href="https://cran.r-project.org/web/packages/RColorBrewer/index.html">https://cran.r-project.org/web/packages/RColorBrewer/index.html</a>                             | 1.1-2                                |
| ggplot2                                  | <a href="https://cran.r-project.org/web/packages/ggplot2/ggplot2.pdf">https://cran.r-project.org/web/packages/ggplot2/ggplot2.pdf</a>                                     | 3.1.0                                |
| ggrepel                                  | <a href="https://cran.r-project.org/web/packages/ggrepel/index.html">https://cran.r-project.org/web/packages/ggrepel/index.html</a>                                       | 0.8.0                                |
| ggfortify                                | <a href="https://cran.r-project.org/web/packages/ggfortify/index.html">https://cran.r-project.org/web/packages/ggfortify/index.html</a>                                   | 0.4.5                                |
| stringr                                  | <a href="https://cran.r-project.org/web/packages/stringr/stringr.pdf">https://cran.r-project.org/web/packages/stringr/stringr.pdf</a>                                     | 1.3.1                                |
| WGCNA                                    | <a href="https://cran.r-project.org/web/packages/WGCNA/index.html">https://cran.r-project.org/web/packages/WGCNA/index.html</a>                                           | 1.66                                 |
| mixOmics                                 | <a href="https://cran.r-project.org/web/packages/mixOmics/index.html">https://cran.r-project.org/web/packages/mixOmics/index.html</a>                                     | 6.3.2                                |

561  
562  
563  
564

**CONTACT FOR REAGENT AND RESOURCE SHARING**



565 Requests for information regarding reagents and resources should be directed to and will be  
566 fulfilled by correspondence to Dr. Ofer Levy MD, Ph.D., Director of the *Precision Vaccines*  
567 *Program* at Boston Children's Hospital, Harvard Medical School, Boston, Massachusetts, USA  
568 (ofer.levy@childrens.harvard.edu).

569

## 570 **EXPERIMENTAL MODEL AND SUBJECT DETAILS**

### 571 **Newborn cohort characteristics and sample preparation**

572 *Guinea-Bissau study of infants receiving BCG at birth or delayed.* A randomized-controlled trial  
573 (RCT) of early BCG vaccination in low birth weight (<2.5 kg) neonates was conducted by the  
574 Bandim Health Project (BHP) in Guinea-Bissau, West Africa, with neonatal mortality as the  
575 primary outcome. A sub-group of the infants participating in the RCT was invited to participate  
576 in an immunological study during 2011-2012 to assess the effect of early BCG vaccination on *ex*  
577 *vivo* cytokine responses to PPD and innate agonists. Previous publications have described the  
578 details of the enrollment and randomization procedures of the RCT (Biering-Sorensen et al.,  
579 2017) and the blood collections and sample processing of the immunological sub-group study  
580 (Jensen et al., 2015). In brief, newborns eligible for participation in the RCT were low birth  
581 weight (<2500 g), not overtly ill, had not received BCG, and had no malformations at the time of  
582 enrollment. Informed consent was obtained from the mothers of the recruited newborns. The  
583 BCG RCT and the immunological sub-study were approved by the National Committee on  
584 Health Ethics of the Ministry of Health in Guinea-Bissau, and a consultative approving statement  
585 was obtained from the Danish National Committee on Biomedical Research Ethics. The BCG  
586 trial was registered with clinicaltrials.gov, number NCT00625482. Details are illustrated in Fig  
587 S1.

588

589 Upon enrollment, the infants were randomized (1:1) to an infant dose of BCG-SSI  
590 (Statens Serum Institut, SSI; Copenhagen, Denmark) or delayed BCG immunization at six  
591 weeks. Infants assigned to early BCG were vaccinated intra-dermally in the upper deltoid region  
592 with 0.05 ml BCG vaccine (strain 1331, SSI, Copenhagen, Denmark) by trained nurses. Infants  
593 assigned to the control group were treated according to local practice such that vaccination was  
594 postponed until they reached >2.5 kg in weight, or more commonly when they presented for their  
595 first Penta vaccine (DTP-HBV-Hib) recommended at six weeks of age. The Pentavalent vaccine  
596 given to infants was either *Easyfive* (Panacea Biotech India), *Quinvaxem* (Berna Biotech Korea  
597 Corp) or *Pentavac* (Serum Institute of India) for this randomized control study. All infants  
598 received oral polio vaccine (OPV) at birth. For enrollment into the immunological sub-group  
599 study, infants were visited at home by the study team four weeks after randomization to BCG or  
600 no BCG. For logistical reasons, infants living in Bissau City and nearby suburbs were given  
601 priority. After providing informed consent, the mother was interviewed about the health status of  
602 her child, and the length, weight, and mid-upper arm circumference of the child were measured.  
603 Clinical data on sex, weight, BCG scar, PPD testing results were also available. Scar size was  
604 defined as the average of two perpendicular diameters on the scar formed at the injection site.  
605 Local reaction to the BCG vaccine was assessed and measured. Blood was collected by heel  
606 puncture into a heparin-coated tube.

607

608 For this current study, we included plasma samples from newborns randomized within  
609 the first week of life. However, samples from infants in the delayed BCG group who had  
610 received BCG before phlebotomy, who were Penta-vaccinated, or had hemolyzed samples were

611 excluded. Biosamples were shipped on dry ice to the *Precision Vaccines Program* (Boston, MA,  
612 USA) for subsequent metabolomic assays (Figure S1). *In vitro* cytokine assays were conducted  
613 as outlined below. For metabolomic and lipidomic assays, samples were selected per sex and  
614 treatment based on the following criteria: 1) Exclusion criteria included a history of vomiting or  
615 diarrhea per mother's report, hemolyzed samples, or limitation of available sample volume (i.e.,  
616 <20 $\mu$ L); 2) Inclusion: To overcome the limitation of sample volumes, ten newborn samples  
617 stratified by sex and treatment were pooled prior to shipment to *Metabolon* (Durham, North  
618 Carolina, USA) for mass spectrometry-based metabolomics and lipidomic assays. These samples  
619 were matched with their clinical information. To gain insight into the impact of BCG  
620 immunization on both innate and adaptive immunity, blood was collected at four weeks and  
621 stimulated *in vitro* with vehicle control (Roswell Park Memorial Institute medium, RPMI), *Toll*-  
622 like receptor (TLR) agonists or PPD. After incubation, supernatants were collected and  
623 cryopreserved prior to batch measurement of cytokines by multiplex assay. Clinical data with  
624 corresponding *in vitro* stimulated blood derived from the early BCG (n=60) and control infants  
625 (delayed BCG, n=60) included in this metabolomics study were reanalyzed and yielded  
626 comparable baseline clinical characteristics (Table S1).

627  
628 *Boston newborn cohort stimulated in vitro with BCG or saline control.* Coded human cord blood  
629 samples (n=12) were collected from healthy term ( $\geq 37$  weeks' gestation) elective cesarean  
630 deliveries in accordance with approved protocols from the Institutional Review Boards of the  
631 Beth Israel Deaconess Medical Center, Boston, MA, and The Brigham & Women's Hospital,  
632 Boston, MA. Blood samples were anti-coagulated with 15 U/ml of clinical-grade pyrogen-free  
633 heparin sodium and assayed within 4h. Blood collected was diluted 1:1 in RPMI medium and  
634 stimulated in 96 well U-bottom plates with BCG-Tice (Merck, 1:1000 vol/vol) and saline vehicle  
635 (1:1000 vol/vol). BCG-Tice was reconstituted with the provided diluent per manufacturer's  
636 instructions and used within 4-6h after reconstitution. After 18 hr incubation at 37°C,  
637 supernatants (90% plasma vol/vol) were collected and stored at -80°C. Two plasma aliquots were  
638 submitted to *Metabolon, Inc* for metabolomics profiling and complex lipids platform. BCG-only  
639 controls were included (High and Low concentration). For these samples, the 'High'  
640 concentration corresponded to the reconstitution of the BCG vaccine in 1 ml saline, and the  
641 'Low' concentration corresponded to a 1:1000 dilution. Three replicates of high concentration  
642 and five replicates of low concentration were processed for each data stream.

643  
644 *EPIC-001 cohort. Gambia in vivo newborn cohort EPI-vaccinated (BCG, HBV, OPV) at birth or*  
645 *delayed-vaccinated* (Lee et al., 2019). As part of the EPIC-001 clinical study, pregnant mothers  
646 were enrolled following informed consent. On the day of birth (DOL 0), peripheral blood  
647 samples were obtained from all newborns pre-vaccination. These newborns, according to group  
648 assignment, were then either immunized with EPI vaccines (oral polio vaccine (OPV), BCG and  
649 Hepatitis B) at birth or after a delay. A follow-up blood sample collection was obtained from all  
650 infants at either DOL 1, DOL 3, or DOL 7 with a maximum of two peripheral blood collections  
651 per participant in the first week of life (Figure 1C, Figure S1C). Plasma preparation and  
652 metabolomics assay for this cohort have been previously described (Lee et al., 2019).

653

## 654 **METHOD DETAILS**

### 655 **Global Untargeted Metabolomics Profiling**

656 Plasma metabolite profiling was conducted by Metabolon using in-house standards  
657 (Evans et al., 2009; Long et al., 2017). Each plasma sample was stored at -80°C and accessioned  
658 into the Metabolon Laboratory Information Management System (LIMS). To enable an  
659 association with the original source identifier and for tracking purposes, each sample was  
660 assigned a LIMS unique identifier. Samples were extracted and prepared for analysis using  
661 Metabolon's solvent extraction method (Evans, 2008). Recovery standards were added to the first  
662 step in the extraction process to ensure proper quality control. Protein was removed by methanol  
663 precipitation under vigorous shaking for 2 mins (Glen Mills GenoGrinder 2000) then by  
664 centrifugation. The supernatants were divided into five fractions: one for analysis by UPLC-  
665 MS/MS with positive ion mode electrospray ionization, one for analysis by UPLC-MS/MS with  
666 negative ion mode electrospray ionization, one for LC polar platform, one for analysis by GC-  
667 MS, and one sample was reserved for backup. Samples were placed briefly on a TurboVap®  
668 (Zymark) to remove the organic solvent. For LC, the samples were stored overnight under  
669 nitrogen before preparation for analysis. For GC, each sample was dried under vacuum  
670 overnight before preparation for analysis (Lawton et al., 2008).

671

### 672 **Complex Lipids Platform Lipidomics**

673 The Complex Lipid Panel (CLP) lipidomics data is a non-chromatographic, infusion-  
674 based targeted discovery platform for a defined list of lipid species. This method does not  
675 produce chromatographic peaks but analyzes a continual stream of lipid extract. No annotation/  
676 identification of compounds is required because the methodology uses a combination of  
677 empirically determined Ion Mobility properties and specifically designed multiple reaction  
678 monitoring (MRM) transitions to uniquely target each lipid species during the analytical process.  
679 Lipids were extracted from *in vivo* Guinea-Bissau newborn plasma samples and from cord blood  
680 plasma after *in vitro* BCG stimulation in the presence of deuterated internal standards using an  
681 automated butanol-method (BUME) extraction (Lofgren et al., 2012). Extracts were dried under  
682 nitrogen and reconstituted in ammonium acetate dichloromethane: methanol then transferred to  
683 vials for infusion-MS analysis employing a Shimadzu LC with nano PEEK tubing and the Sciex  
684 SelexIon-5500 QTRAP. Samples were analyzed via both positive and negative mode  
685 electrospray. The 5500 QTRAP was operated in multiple reaction monitoring modes (MRM)  
686 with a total of >1,100 MRMs.

687

### 688 **TLR agonist- and PPD antigen- induced cytokine responses in blood derived from early vs. 689 delayed BCG immunized newborns**

690 To assess the effect of BCG administration to Guinea-Bissau study participants on  
691 subsequent *in vitro* TLR agonist- (innate) and PPD antigen (adaptive)- induced cytokine  
692 responses, heparinized blood collected at 4 weeks was diluted 1:9 with RPMI-1640 void of L-  
693 Glutamine (Gibco, Life Technologies Europe BV) supplemented with Pyruvate 1 mM (Na-  
694 pyruvate, Lonza; Copenhagen, Denmark) and L-Glutamine–Penicillin–Streptomycin 1X (Gibco,  
695 Life Technologies). *In vitro* re-stimulation with phorbol 12-myristate 13-acetate (PMA) (100  
696 ng/mL; Sigma-Aldrich) and ionomycin (1 µg/mL) (Sigma-Aldrich) as a positive control; PPD  
697 antigen from *M. tuberculosis* (Statens Serum Institut, Copenhagen, Denmark) (10 µg/mL) to  
698 assess the mycobacterial specific response; lipopolysaccharide (LPS) (10 ng/mL) (Sigma-  
699 Aldrich) [a Toll-like receptor (TLR)4 agonist]; (S)-(2,3-bis(palmitoyloxy)-(2-RS)-propyl)-N-  
700 palmitoyl-(R)-Cys-(S)-Ser-(S)-Lys4-OH, trihydrochloride (Pam3CSK4) (1 µg/mL) [a TLR2/1  
701 agonist] (InvivoGen); Thiazoloquinoline Compound (CL075) (1 µg/mL) [a TLR8/7 agonist]

702 (InvivoGen) employed 200  $\mu$ L round-bottom microtiter plates (NUNC; Roskilde, Denmark) in a  
703 37°C humidified incubator with 5% CO<sub>2</sub> for 24 hr to assess the mycobacterial specific response  
704 together with RPMI control. After 24h of culture, supernatants were collected and stored at  $\leq$   
705  $-70^{\circ}$ C until analysis. Cytokine concentrations were measured at SSI, employing an  
706 immunobead-based multiplexed assay as previously described (Skogstrand et al., 2005).

707  
708

## 709 **QUANTIFICATION AND STATISTICAL ANALYSIS**

### 710 **Global Metabolomics and Lipidomics Analysis**

711 For metabolomics, compounds were identified by comparison to Metabolon library  
712 entries of standard metabolites (Evans et al., 2009). Biochemical identification was based on  
713 three criteria: retention index (RI) within a narrow RI window of the proposed identification,  
714 accurate mass match to the library  $\pm 10$  ppm, and the MS/MS forward and reverse scores  
715 between the experimental data and authentic standards. The MS/MS scores were based on a  
716 comparison of the ions present in the experimental spectrum to the ions present in the library  
717 spectrum. Exact molecular mass data from redundant m/z peaks corresponding to the formation  
718 of different parent and product ions were first used to help confirm the metabolite molecular  
719 mass. Metabolon's *MassFragment*<sup>TM</sup> application manager (Waters MassLynx v4.1, Waters  
720 Corp.; Milford, USA) facilitated the MS/MS fragment ion analysis process using peak-matching  
721 algorithms and quantified using area-under-the-curve. All identified metabolites were  
722 categorized as Level 1 metabolites according to reporting standards set by the Chemical Analysis  
723 Working Group of the Metabolomics Standards Initiative (Members et al., 2007; Spicer et al.,  
724 2017; Sumner et al., 2007), and appropriate orthogonal analytical techniques were applied to the  
725 metabolite of interest and to a chemical reference standard. Level 1 identification included  
726 analyses of two or more orthogonal properties of an authentic chemical standard. Metabolites  
727 identified in our study had a corresponding accurate mass confirmed via MS with retention  
728 index, chemical, and composition ID, and those with an exact matching mass were reported.

729  
730 Raw data were measured based on LC-MS peak areas proportional to feature  
731 concentration. Quality control measures were performed by the following steps: 1. Missingness  
732 assessment of the data; 2. Missing values were imputed with half the minimum detected level for  
733 a given metabolite; 3. Metabolites with an interquartile range of 0 and xenobiotics were excluded  
734 from the analysis; 3. Features (relative peak intensities) were log-transformed, normalized then  
735 pareto-scaled to reduce variations. 4. Visual inspection with Principal Component Analysis  
736 (Figure S2A-J). Statistical analyses for univariate, chemometrics, and clustering analysis used in-  
737 house algorithms, R statistical packages, and *MetaboAnalyst 4.0* (Xia et al., 2015; Xia and  
738 Wishart, 2016). Metabolite super pathways consist of biochemical metabolite annotation  
739 corresponding to their general metabolic class, including amino acid, carbohydrate, lipid,  
740 nucleotide, energy, peptide, cofactors and vitamins, and xenobiotics. We filtered out the  
741 xenobiotics to only focus on endogenous metabolites. Each super pathway is further subdivided  
742 into  $\geq 2$  more specific sub-pathways. The hypergeometric test in *MetaboAnalyst* was specified for  
743 the over-representation analysis and relative-betweenness centrality for the pathway topology  
744 analysis.

745  
746 Pathway analyses and visualization employed *MetaboAnalyst 4.0* Metabolite Set  
747 Enrichment Analysis (MSEA) based on the KEGG Pathway ([www.genome.jp/kegg/](http://www.genome.jp/kegg/)) and the

748 Human Metabolome Database Version 3.6 (HMDB). MSEA identifies biologically meaningful  
749 patterns in changes in metabolite concentrations by evaluating the significance individually  
750 under each condition. Metabolites that reached significance ( $\alpha=0.05$ ) were combined in an  
751 effort to detect meaningful patterns and investigate if a group of functionally related metabolites  
752 was enriched. This method can identify subtle but consistent changes among metabolites that  
753 may not be detected by conventional approaches (Jia et al., 2014; Xia and Wishart, 2011, 2016).  
754 To enhance the robustness of our findings despite small effect sizes, we have focused on  
755 pathways that are perturbed after comparison to their own controls across multiple cohorts *in*  
756 *vivo* and *in vitro*. Statistical modeling was based on data distribution for each dataset. For plasma  
757 metabolomic data from Guinea-Bissau *in vivo* samples, early and delayed BCG groups were  
758 compared using unpaired t-test with Welch's correction. For the Gambia cohort, the peripheral  
759 blood was profiled twice over the first week of life at DOL0 and at a second point at either  
760 DOL1, 3, or 7. Univariate analyses were performed by analyzing paired differences per  
761 participant, referred to as indexing. The analysis then proceeds by looking for differences  
762 between treatments (delayed vs. EPI-vaccinated) rather than DOL.

764 For lipidomics, individual lipid species were quantified by comparing the ratio of the  
765 signal intensity of each target compound to that of its assigned internal standard, then  
766 multiplying by the concentration of internal standard added to the sample. Lipid class  
767 concentrations were calculated from the sum of all molecular species within a class, and fatty  
768 acid compositions were determined by calculating the proportion of each class comprised of  
769 individual fatty acids. Of note, some of the same lipids detected in both platforms are named  
770 differently due to conventions employed when the libraries for each platform were initially  
771 developed (e.g., 1-palmitoyl-GPC (16:0) in Global and LPC (16:0) in CLP). Additionally, some  
772 isomers can be resolved on the Global platform (e.g., 1-oleoyl-GPC (18:1) and 2-oleoyl-GPC  
773 (18:1)) while CLP reports the total of both (LPC 18:1). Missing values were imputed by  
774 assigning them the minimum observed value for each compound. A similar approach used for *in*  
775 *vivo* and *in vitro* metabolomics, namely log-transformation and modeling, was applied to identify  
776 lipids that differed significantly between experimental groups. The *Surveyor* program was  
777 employed for data organization and visualization of the fatty acids measured. Statistical analyses  
778 for metabolomics and lipidomics employed R version 3.4.1. Comparisons with  $p<0.05$  were  
779 considered statistically significant with figure asterisks denoting level of significance (\* $p<0.05$ ;  
780 \*\* $p<0.01$ ; \*\*\* $p<0.001$ ). Lipid species coverage and concentrations for *in vivo* and *in vitro*  
781 studies are further described in Tables S9 and S10.

### 783 Targeted Assays

784 Plasma cytokine and chemokine concentrations were measured by multiplex assay, using  
785 a Flexmap 3D system with Luminex xPONENT software version 4.2 (Luminex Corp.; Austin,  
786 TX, USA). Cytokines and chemokines were measured using Milliplex Analyst software (v.  
787 3.5.5.0, Millipore). Infant blood from the Guinea Bissau infant cohort was diluted and stimulated  
788 *in vitro* with PPD or TLR agonists and cytokine and chemokine production measured as  
789 previously described (Jensen et al., 2015). Cytokine and chemokine production from blood  
790 derived from the subset of newborn participants included in our metabolomics and lipidomics  
791 study was analyzed using an unpaired Wilcoxon Rank-sum Test. Comparisons with  $p<0.05$  were  
792 considered statistically significant with figure asterisks denoting level of significance (\* $p<0.05$ ;  
793 \*\* $p<0.01$ ; \*\*\* $p<0.001$ ). Data are depicted as medians.

794 For the Boston cohort, a heatmap was generated, and treatment groups were compared  
795 using two-sample t-tests with Benjamini, Krieger, and Yekutieli correction by comparing BCG-  
796 stimulated vs. vehicle control conditions from the same participants. Individual metabolites were  
797 compared using a repeated-measures approach (Wilcoxon matched-pairs rank-sum test).  
798 Comparisons with  $p < 0.05$  were considered statistically significant with figure asterisks denoting  
799 level of significance (\* $p < 0.05$ ; \*\* $p < 0.01$ ; \*\*\* $p < 0.001$ ). Data are shown as means  $\pm$  SEM.

800

### 801 **Data Deposition**

802 Data files for metabolomics and lipidomics were deposited in ImmPort under accession numbers:  
803 SDY1376 and SDY1709.

804

### 805 **Supplemental Information**

806 Supplemental information includes five figures and ten tables.

807

### 808 **Author Contributions**

809 Conceptualization: JDA, CB, OL; Clinical: JDA, KJ, BK, CB; Methodology: JDA, SvH, MP;  
810 Formal Analysis, JDA, RK, JLS, AO; Writing-Original Draft: JDA, KJ, AA, GC; Writing-  
811 Review & Editing: AA, RK, SvH, HS, JLS, AO, BK, TK, CB, OL; Resources: OL; Supervision:  
812 OL; Funding Acquisition: OL.

813

### 814 **Acknowledgments**

815 We thank the participant families, nurses, and physicians of the Bandim Health Project  
816 for enabling sample collection. We appreciate the Medical Research Council Gambia team for  
817 recruitment, enrollment, and acquisition of samples. We also thank the Departments of Newborn  
818 Medicine at the Brigham and Women's Hospital and Beth Israel Deaconess Medical Center for  
819 cord blood collection. We thank Dr. Karen Pepper of MIT for providing valuable feedback and  
820 editing the manuscript, Kristin Johnson of Boston Children's Hospital for illustrations, Sofia  
821 Vignolo, Tanzia Shaheen, Annmarie Hoch for data deposition, and Diana Vo for programmatic  
822 support. The European Research Council supported the randomized trial of BCG to CB (starting  
823 grant ERC-2009-StG-243149), the Danish National Research Foundation (grant DNRF108 to  
824 Research Center for Vitamins & Vaccines), and DANIDA, European Union FP7, and  
825 OPTIMUNISE (grant Health-F3-2011-261375 to the Bandim Health Project); the  
826 immunological sub-group study of early BCG vaccination was supported by Novo Nordisk  
827 Foundation and a Ph.D. scholarship grant from University of Southern Denmark to KJ; KJ is  
828 supported by a grant from Novo Nordisk Foundation (grant NNF14OC0012169).

829 This study was supported by the National Institute of Health/National Institute of Allergy &  
830 Infectious Diseases Human Immunology Project Consortium Grant U19AI118608 and  
831 Molecular Mechanisms of Combinations Adjuvants Grant U01 AI124284, as well as the BCH  
832 *Precision Vaccines Program*. AA and OL were supported in part via the Mueller Health  
833 Foundation.

834

### 835 **Declaration of Interests**

836 O.L is a named inventor on several Boston Children's Hospital patents relating to human  
837 microphysiologic assay systems and vaccine adjuvants. S.M and G.M are employees of  
838 Metabolon Inc. The other authors declare no competing financial interests.

839

840 **Figure Titles and Legends**

841 **Graphical abstract:**

842 **BCG vaccination perturbs metabolic pathways *in vivo* and *in vitro*.**

843 Vaccines have traditionally been developed empirically, with limited insight into their  
844 impact on molecular pathways. Metabolomics provides a new approach to characterizing vaccine  
845 mechanisms but has not yet been applied to human newborns, who are at the highest risk of  
846 infection and receive the most vaccines. Bacille Calmette-Guérin (BCG) prevents disseminated  
847 mycobacterial disease in children and can induce broad protection to reduce mortality due to  
848 non-TB infections. Underlying mechanisms are incompletely characterized. Employing mass  
849 spectrometry-based metabolomics, we demonstrate that early BCG administration alters the  
850 human neonatal plasma metabolome, especially lipid metabolic pathways such as  
851 lysophosphatidylcholines (LPCs), both *in vivo* and *in vitro*. Plasma LPCs correlated with both  
852 innate TLR-mediated and PPD antigen-induced cytokine responses suggesting that BCG-induced  
853 lipids might contribute to the immunogenicity of this vaccine. Vaccine-induced metabolic  
854 changes may provide fresh insights into vaccine immunogenicity and inform the discovery and  
855 development of early life vaccines.

856  
857 **Figure 1: Schematic of *in vivo* (A), *in vitro* (B), and validation cohort (C) for BCG**  
858 **vaccination experimental setup.**

859 (A) Study design and participant plasma biosample flow chart. Low birth weight newborns in  
860 Guinea-Bissau were assigned to delayed BCG (catch-up BCG after blood collection) or  
861 early BCG (vaccinated with BCG at birth). In an immunological study nested within the  
862 trial, capillary blood samples were collected four weeks after randomization to  
863 investigate the effect of BCG on TLR agonist-induced and PPD antigen recall cytokine  
864 responses. After the primary analyses (Jensen et al., 2015), plasma biosamples of  
865 sufficient volume were utilized for subsequent metabolomic and lipidomic assays. To  
866 ensure sufficient sample volume for robust metabolite detection, metabolomics (Q  
867 Exactive, Thermo Scientific, Metabolon Inc; Durham, NC) and complex lipid panel  
868 lipidomics (CLP, Metabolon Inc) were conducted on pooled plasma from N = 10  
869 newborns of the same sex and vaccine treatment.

870 (B) To further assess BCG's impact on the plasma metabolome, we modeled BCG vaccine  
871 responses *in vitro* in cord blood from a cohort of newborns in Boston, USA. Similarly,  
872 supernatants from these *in vitro* stimulated samples were subjected to high throughput  
873 metabolomic, lipidomic, and cytokine/chemokine assays, and results indexed to the same  
874 participant's vehicle (saline) control.

875 (C) For validation purposes, we compared the metabolomics profile of Guinea-Bissau *in vivo*  
876 and Boston *in vitro* cohorts with another independent newborn group from The Gambia  
877 (West Africa)(Lee et al., 2019). Newborns were assigned to either receive the Expanded  
878 Program on Immunization (EPI) vaccines (OPV, BCG, and HBV) at birth or delayed  
879 during the first week of life to study the effect of vaccine responses on early life immune  
880 ontogeny. Paired samples were analyzed by indexing their DOL0 (day of birth) samples  
881 and a follow-up timepoint at DOL1, DOL3, or DOL7. Regardless of their timepoint  
882 assignment, the newborns were combined into their assigned treatment groups (EPI-  
883 vaccinated vs. delayed-vaccinated) for the purposes of analysis.

884  
885 **Figure 2: BCG immunization perturbed the human neonatal plasma metabolome.**

- 886 (A) Schematic layout of blood collection for the *in vivo* Guinea-Bissau newborn cohort. Early  
887 BCG denotes newborn participants given BCG together with OPV at birth. Delayed BCG  
888 represents newborn participants who received only OPV at birth and BCG catchup after  
889 the 4-week blood collection.
- 890 (B) Multivariate sparse Partial Least Square Discriminant Analysis (sPLS-DA) applied to  
891 metabolic data demonstrated differences between delayed BCG and early BCG  
892 newborns.
- 893 (C) Top 30 loading plot of each feature selected on the first component in between treatments  
894 with a maximal median value for each metabolite. Blue bars denote metabolites  
895 associated with delayed BCG, while orange bars denote metabolites associated with early  
896 BCG.
- 897 (D) Unsupervised hierarchical clustering of differentially abundant metabolites (DAMs)  
898 revealed significant differences in lipid and amino acid responses between early and  
899 delayed BCG.
- 900 (E) A plot of the ratio of metabolites in the BCG vs. delayed groups depicts all identified  
901 metabolites by category comparing early vs. delayed BCG. Significant metabolites were  
902 identified per metabolite class, annotated with red for significant metabolites ( $p < 0.05$ ),  
903 pink for nearly significant metabolites ( $0.05 < p < 0.1$ ), and gray for non-significant  
904 metabolites. Of the seven metabolite categories that differed between the early and  
905 delayed BCG groups, lipid metabolites were particularly and significantly perturbed by  
906 BCG. Data are presented as  $\log_2$  fold-change of early vs. delayed BCG.

907  
908 **Figure 3: Early administration of BCG to human newborns *in vivo* altered the plasma**  
909 **lipidome.**

910 Network reconstruction of BCG-altered metabolic pathways demonstrated perturbation of lipid  
911 metabolism.

- 912 (A) Over half of identified metabolites induced by newborn BCG vaccination belonged to the  
913 lipid class, followed by amino acids. Among the significantly altered lipids, 70% (24  
914 identified metabolites) of the lipids belonged to the lysophospholipid (LPL) subclass.  
915 Data are presented as counts of significant lipids.
- 916 (B) Examples of significantly different lipid metabolites between the early vs. delayed BCG  
917 groups. Boxplots display medians with lower and upper hinges representing first and  
918 third quartiles; whiskers reach the highest and lowest values no more than 1.5x  
919 interquartile range from the hinge. Welch's t-test was used for data analysis. Data  
920 presented are the scaled, normalized peak intensities of the metabolites. \*  $P < 0.05$ ;  
921 \*\*  $P < 0.01$ ; \*\*\*  $P < 0.001$  vs. control.
- 922 (C) Pathway-based network reconstruction of DAMs from 4-week-old infants vaccinated  
923 with BCG in the first week of life compared to the delayed BCG group (*Metscape* on  
924 *Cytoscape* 3.4.0). The illustrated lipid pathways include lipid biosynthesis pathways  
925 (steroid hormone, fatty acid, androgen and estrogen, cholesterol), glycerophospholipid,  
926 glycosphingolipid, omega 6-fatty acid, prostaglandin, and arachidonic acid metabolism.  
927 Legend key represents detected metabolites, levels comparing early vs. delayed BCG:  
928 down (blue), up (red), white (unchanged), and gray (undetected) with their  $\log_2$  fold-  
929 change values.

930  
931 **Figure 4: Plasma lipidomics reveals biomarkers of neonatal BCG vaccination.**



- 932 (A) Complex lipid panel pipeline schematic diagram. Lipid extracts were subjected to LC-  
933 MS/MS analyzed via both positive and negative mode electrospray. Lipids were profiled  
934 and identified based on known lipid reference standards. The statistical analyses  
935 employed are described in the Methods section.
- 936 (B) Lipidomics panel identified 963 lipids from the *in vivo* newborn cohort belonging to 14  
937 different lipid subclasses, with triglycerides being the most abundant. Data represent  
938 counts of identified lipids.
- 939 (C) Supervised sPLS-DA from Guinea-Bissau newborns distinctly discriminated lipids  
940 between early and delayed BCG groups with PC1 accounting for 52% of variance and  
941 PC2 for 15% variance.
- 942 (D) Early administration of BCG at birth significantly perturbs plasma lipid concentrations at  
943 4 weeks of age. Significantly altered lipid metabolites in the early vs. delayed BCG  
944 newborn group were annotated in red ( $P < 0.05$ ), those that were nearly significant in  
945 pink ( $P < 0.1$  to  $P > 0.05$ ), and those that were not significant in gray.
- 946 (E) Stimulation of human newborn cord blood *in vitro* with BCG perturbs phospholipid  
947 pathways. Supernatants from blood stimulated *in vitro* for 18 hr with vehicle control, or  
948 BCG were subjected to lipidomics and demonstrated much lower production of lipids  
949 compared to control. Significantly altered lipid metabolites in the BCG vs. vehicle  
950 conditions were annotated in red ( $P < 0.05$ ), those that were nearly significant in pink ( $P$   
951  $< 0.1$  to  $P > 0.05$ ), and those that were not significant in gray.
- 952 (F) The majority of significantly perturbed lipids were decreased both *in vitro* following 18  
953 hr BCG stimulation and *in vivo* following early BCG immunization, reflecting a BCG-  
954 induced metabolic signature. Comparison of significant lipids between the *in vivo*  
955 Guinea-Bissau and *in vitro* Boston cohorts reported as  $\log_2$  fold-change of early  
956 BCG/delayed BCG (Guinea-Bissau) and BCG-stimulated/control (Boston). With the  
957 exception of free fatty acid components and LPC 16:0, the directionality of lipid fold-  
958 changes was similar *in vivo* and *in vitro*.
- 959 (G) Concentrations of multiple LPC components were significantly decreased in BCG-  
960 stimulated samples *in vivo* and *in vitro*. Data are presented as  $\log_2$ FC of early vs. delayed  
961 (or no) BCG.

962  
963 **Figure 5. Addition of BCG to human newborn cord blood *in vitro* induced changes in**  
964 **plasma sugar, amino acid, and lipid pathways.**

- 965 (A) Human newborn cord blood was stimulated *in vitro* with vehicle control (saline) or BCG  
966 for 18 hr, and the extracellular fluid (90% plasma vol/vol) was collected by centrifugation  
967 for metabolomics analysis as described in Methods. The principal component analysis  
968 demonstrated a marked separation of metabolites between BCG-stimulated and vehicle-  
969 stimulated newborn samples as indicated by the ellipses.
- 970 (B) Unsupervised hierarchical clustering revealed major differences between treatments.  
971 BCG stimulation of blood was associated with a reduction in many metabolites,  
972 especially in the lipid pathway. Each column represents individual samples; BCG-stim  
973 denotes BCG-stimulated blood; Control denotes vehicle control.
- 974 (C) Top 50 enrichment overview based on metabolite set enrichment analysis (MSEA;  
975 *MetaboAnalyst*) highlighted pathways that were prominently altered after BCG  
976 stimulation, including those relating to the glucose-alanine cycle, lactose, and  
977 sphingolipid metabolism. Fold enrichment was calculated by dividing the observed

978 number of hits by the expected number of hits of the overrepresented pathway. MSEA  
979 calculates a hypergeometric test score employing a cumulative binomial distribution  
980 based on the probability of seeing at least a particular number of metabolites with the  
981 biological term of interest in a given compound list.  
982 (D) The volcano plot illustrated BCG-induced changes in metabolites as compared to vehicle  
983 control. Red color represents significant ( $P < 0.05$ ), pink marginally significant ( $P < 0.1$   
984 to  $P > 0.05$ ), and gray non-significant lipids.

985  
986 **Figure 6: BCG-induced plasma lysophospholipids correlated with TLR- and mycobacterial**  
987 **antigen-induced cytokine responses.**

988 Peripheral blood was collected from early vs. delayed BCG immunized infants in Guinea Bissau  
989 at 4 weeks of age and diluted for *in vitro* TLR agonist- and PPD-induced stimulation assay as  
990 previously described (Jensen et al., 2015).

991 (A-F) Early administration of BCG was associated with perturbation of multiple LPCs as  
992 compared to delayed BCG. LPC concentrations are depicted as boxplots. Significance  
993 was calculated using the Mann-Whitney Rank Test between unpaired samples.

994 (G) Cytokines and chemokines were measured after multiple antigen recall responses of  
995 delayed and early BCG newborn samples. Response from PMA, LPS (TLR4 agonist),  
996 PAM3CSK4 (TLR 2/1 agonist), CLO75 (TLR 7/8), and PPD were correlated for  
997 corresponding matched samples using Pearson correlations of all LPCs. Data are  
998 presented as correlation estimates of cytokines/chemokines vs. LPCs. These estimates  
999 were calculated from  $\log_2$  fold-changes for early BCG vs. delayed BCG.

1000 (H) The summary correlation coefficient (R) from selected significant cytokine and LPC  
1001 correlations is depicted on a forest plot. The plot presented significant correlations with  
1002 corresponding 95% CIs.

1003 **Figure 7: Concordance of significant metabolites across distinct human newborn cohorts**  
1004 **demonstrates a common BCG-induced metabolic trajectory in early life.**

1005 (A) Untargeted global metabolomics profiling was conducted on peripheral blood of  
1006 newborns vaccinated with EPI vaccines (BCG, HBV, and OPV) in The Gambia (n= 27)  
1007 during the first week of life. Venn diagram summarizes the number of shared metabolite  
1008 sets enriched after metabolite set enrichment analysis (MSEA, *MetaboAnalyst*) in The  
1009 Gambia *in vivo* cohort (green), Boston *in vitro* cohort (yellow), and Guinea-Bissau *in*  
1010 *vivo* 4-week blood collection (blue).

1011 (B) A number of significant metabolites per cohort based on their pattern level are illustrated.  
1012 Data are presented as counts of significantly decreased or increased metabolites. BCG-  
1013 induced fold-changes were calculated as compared to control groups.

1014 (C) Significant metabolites shared by two or more cohorts were depicted as a heatmap with  
1015 their log fold-change values comparing BCG-vaccinated vs. delayed (GB)/non-BCG  
1016 vaccinated (Gambia) or BCG-stimulated vs. control for the Boston *in vitro* cohort. Paired  
1017 samples were analyzed for Gambia and Boston samples, respectively. Direction of  
1018 change is indicated by color code: blue, down; red, up; grey, not quantified.

1019 (D) Chord diagram of vaccine-induced metabolite associations revealed shared metabolite  
1020 sets with vaccination compared to each control (Guinea-Bissau: blue, Boston: yellow,  
1021 Gambia: green). Metabolite set bar widths are proportional to the number of associations  
1022 across groups. Individual chords connected to each metabolite set indicate associations  
1023 resulting from MSEA analysis.

1024 **Supplementary Figures:**

1025 **Figure S1. Flow chart of individuals with plasma samples analyzed in the study.**

- 1026 (A) Low birth weight newborns in Guinea Bissau were randomized to receive BCG at birth  
1027 (early BCG) or delayed by 6 weeks (delayed BCG). In an immunological study nested  
1028 within the trial, capillary blood samples were collected four weeks after randomization to  
1029 assess the effect of BCG on *in vitro* antigen-induced recall cytokine responses. After the  
1030 primary analyses (Jensen et al., 2015), remaining plasma samples of sufficient volume  
1031 were utilized for subsequent metabolomic and lipidomic assays.
- 1032 (B) Human newborn cord blood samples (n= 12) were collected from healthy term newborns  
1033 ( $\geq 37$  weeks gestation) for *in vitro* stimulation with vehicle (saline) or BCG. The plasma  
1034 samples were processed for metabolomics, complex lipid panel lipidomics, and multiplex  
1035 cytokine/chemokine assays.
- 1036 (C) Newborns were recruited in The Gambia (West Africa). Each newborn provided a  
1037 peripheral blood sample at the day of birth (DOL0) and subsets of newborns, each  
1038 providing a second peripheral blood sample at either DOL1, 3, or 7. The newborns were  
1039 assigned to either delayed-vaccinated up to 1 week (participant n= 13, total samples  
1040 n=26) or EPI-vaccinated at birth (participant n=14, total samples n=28). Newborn  
1041 peripheral venous blood was drawn directly into heparinized collection tubes and  
1042 subjected to metabolomic assay.

1043  
1044 **Figure S2: Summary of quality control and assurance method for metabolomics Guinea-**  
1045 **Bissau (in vivo, upper panel) and Boston (in vitro, lower panel) datasets.**

- 1046 (A) and (F) Histogram of percent missing values for each metabolite  
1047 (B) and (G) Histogram of percent missing values for each sample  
1048 (C) and (H) Quality control and assurance metrics summary table  
1049 (D) and (I) Pre-processing distribution before scaling and normalization  
1050 (E) and (J) Post-processing distribution after scaling and normalization

1051  
1052 **Figure S3: Addition of BCG to human newborn cord blood *in vitro* perturbs the eicosanoid**  
1053 **lipid pathway.**

- 1054 (A) Heparinized human cord blood was stimulated with saline control or BCG vaccine for 18  
1055 hr after which the extracellular medium was collected and analyzed via complex lipid  
1056 panel lipidomics. BCG alone was tested at high (1:10 v/v) and low (1:1000v/v)  
1057 concentrations as controls. For *in vitro* studies, the 1:1000 vol/vol ratio was used. A  
1058 summary of the number of lipids quantified is illustrated. Data are presented as mean  $\pm$   
1059 SEM.
- 1060 (B) Comparison of lipid families showed that BCG-only controls (BCG vaccine alone) have  
1061 lower measured lipids in most families than cord blood stimulated with vehicle or BCG.  
1062 For *in vitro* treatments, BCG low (1:1000 vol/vol) concentration was used to stimulate  
1063 cord blood. Lipid families with very low or undetectable concentrations after BCG-only  
1064 low or BCG cord stimulation (1:1000 vol/vol) are depicted in red.
- 1065 (C) The Venn diagram of detected lipids illustrates that BCG-only controls had fewer lipids  
1066 detected than *in vitro* control- or BCG-stimulated cord blood samples.
- 1067 (D-F) BCG-induced differentially abundant lipids (DALs) included fatty acid components  
1068 such as prostaglandin E<sub>2</sub> (PGE<sub>2</sub>) (panel D), docosahexaenoic acid (DHA 22:6) (panel E),  
1069 linoleic acid (FFA 18:2) (panel G), and arachidonic acid (FFA 20:4) (panel H) suggesting

1070 BCG modulates lipid mediators of inflammation (panel F). BCG induced a pro-inflammatory  
1071 eicosanoid pathway pattern *in vitro*, decreasing anti-inflammatory DHA 22:6, FFA 18:2, and  
1072 FFA 20:4 while increasing pro-inflammatory PGE<sub>2</sub>. Statistical analyses employed repeated  
1073 measures t-test for participant samples. Data are presented with box and whiskers depicting  
1074 quartiles and variability outside the quartiles.  
1075

1076 **Figure S4: Early BCG group demonstrated enhanced cytokine production upon PPD re-**  
1077 **stimulation of heparinized blood collected 4 weeks post BCG vaccination.**

1078 (A-G) PPD-induced cytokines were compared in the early vs. delayed BCG groups. The  
1079 early BCG group demonstrated significantly greater PPD-induced production of TNF $\alpha$ , IL5,  
1080 IL6, IL17 and IFN $\gamma$ . Groups were compared using the Wilcoxon Rank Sum Test. Data are  
1081 depicted as geometric means. \*  $P < 0.05$ ; \*\*  $P < 0.01$ ; \*\*\*  $P < 0.001$   
1082

1083 **Figure S5: BCG-induced cytokine and chemokine production in Boston human newborn**  
1084 **cord blood *in vitro*.**

1085 (A) Heatmap depicting changes in the production of 41 selected cytokines and chemokines  
1086 after BCG *in vitro* stimulation for 18 hr. Two-sample t-tests with Benjamini, Krieger and  
1087 Yekutieli correction comparing BCG-stimulated vs. vehicle control \*  $P < 0.05$ ; \*\*  $P <$   
1088  $0.01$ ; \*\*\*  $P < 0.001$ . Data are reported using Euclidean distance and Ward algorithm.  
1089 (B-E) Selected inflammatory cytokines showed differences between vehicle control  
1090 stimulated cord blood vs. BCG-stimulated cord blood. Paired student t-test used for data  
1091 analysis \*  $P < 0.05$ ; \*\*  $P < 0.01$ ; \*\*\*  $P < 0.001$   
1092  
1093  
1094  
1095

1096

1097 **Table S1: Characteristics of newborn groups for Guinea-Bissau *in vivo* metabolomics**  
1098 **profiling**

1099 Clinical data analyses for the study participants were assessed by metabolomics. Missing values  
1100 were excluded. After the blood draw at 4 weeks after birth, the delayed group received catch-up  
1101 BCG vaccination within 2 months of life. Normally distributed numerical values were tested  
1102 with unpaired *t*-test with Welch's correction, presented as means with 95% confidence intervals  
1103 (CI).

1104 \*Significantly different ( $p < 0.05$ ).

1105 Abbreviations: BCG, Bacillus Calmette–Guérin; PPD, purified protein derivative; TST, Mantoux  
1106 tuberculin skin test.

1107

1108 **Table S2: Significantly altered plasma metabolites in the early vs. delayed BCG group.** An  
1109 unpaired *t*-test with Welch's correction was employed (nom.  $p < 0.05$ ) to identify altered  
1110 metabolites in plasma samples derived from newborns receiving early vs. delayed BCG. Please  
1111 see the spreadsheet.

1112

1113 **Table S3: BCG-Induced Metabolite Pathways enriched in newborn cohorts.** Metabolite Set  
1114 Enrichment Analysis (MSEA) employed *MetaboAnalyst* to evaluate and group significant  
1115 metabolites for each cohort, including Guinea-Bissau and Gambia *in vivo* and Boston *in vitro*.  
1116 The table includes identified metabolite sets, the total number of metabolites corresponding to  
1117 each set, expected metabolites, and the number of hits per cohort.

1118

1119 **Table S4: A birth dose of BCG induced plasma lipidome changes *in vivo*.**

1120 Plasma from newborns in Guinea-Bissau whose blood was collected after 4 weeks for early vs.  
1121 delayed BCG vaccination was subjected to lipidomics. Differentially abundant lipids (DALs)  
1122 between treatment groups are reported along with their corresponding pathway, super-pathway,  
1123 sub-pathway, lipid identification platforms, fold-change upon early BCG immunization (i.e.,  
1124 early BCG vs. delayed BCG), and significance.

1125

1126 **Table S5: BCG induced changes in plasma metabolites in newborn cord blood *in vitro*.**

1127 Human newborn cord blood was stimulated *in vitro* for 18 hr with BCG (1:1000 vol:vol) or  
1128 saline control prior to collecting the extracellular medium for metabolomics. Matrices were  
1129 computed for indexed matched samples comparing BCG stimulation vs. saline vehicle control  
1130 using the *WithinVariation* function in R package *mixOmics* v. 6.1.2. (See spreadsheet in the  
1131 supplementary materials).

1132

1133 **Table S6: Tobit regression analysis of cytokine responses of *ex vivo* stimulated (PPD and**  
1134 **control) whole blood samples from the Guinea-Bissau newborn cohort (pg/mL).**

1135 Cytokine measurements were performed on early BCG and delayed BCG newborn samples  
1136 stimulated *in vitro* with RPMI control and PPD at 4 weeks as described (Jensen et al., 2015;  
1137 Skogstrand et al., 2005). Results are reported as geometric mean ratios (GMR) and 95%  
1138 confidence intervals (CI) with concentrations in pg/mL;  $n = 119$ . Cytokines whose concentrations  
1139 significantly differed between the early vs. delayed BCG group are indicated in bold.

1140 Abbreviations: BCG, Bacillus Calmette–Guérin; CI, confidence interval; PPD, purified protein  
1141 derivative TB test; GMR, geometric mean range

1142 **Table S7: Addition of BCG to human cord blood *in vitro* induced plasma lipidome changes.**

1143 Human cord blood collected from a Boston cohort was stimulated *in vitro* for 18 hours with  
1144 vehicle control vs. BCG. The extracellular medium (90% plasma vol/vol) was subsequently  
1145 analyzed by lipidomics. Identified lipids were analyzed using a repeated-measures test for  
1146 matched participants. Significant lipids were reported with their corresponding pathway, super-  
1147 pathway, sub-pathway, platforms used, fold-change of treatment (matched BCG-stimulated vs.  
1148 control), and significance level.

1149  
1150 **Table S8 EPI-vaccination at birth alters the plasma metabolome.** Significant plasma  
1151 metabolites in the EPI-vaccinated vs. delayed vaccinated (in the first week of life) newborns are  
1152 shown. Peripheral blood was collected from a human newborn cohort in The Gambia (West  
1153 Africa) that received EPI immunization (BCG, HBV, and OPV) either at birth (Day of Life  
1154 (DOL)-0) or delayed immunization to DOL-7. Blood was promptly fractionated to generate  
1155 cryopreserved plasma that was batch-analyzed for global metabolomics. Data were analyzed  
1156 taking into account treatment groups (EPI-vaccinated at birth vs. delayed) and DOL.

1157  
1158 **Table S9: Complex Lipid Panel lipidomics Guinea Bissau *in vivo*,** Assay coverage, individual  
1159 lipid class species, and concentrations ( $\mu\text{M}$ ) are reported.

1160  
1161 **Table S10: Complex Lipid Panel lipidomics Boston *in vitro*.** Assay coverage, individual lipid  
1162 class species, and concentrations ( $\mu\text{M}$ ) are reported.

1163  
1164

## 1165 **References**

- 1166 Ackerman, M.E., Barouch, D.H., and Alter, G. (2017). Systems serology for evaluation of HIV  
1167 vaccine trials. *Immunol Rev* 275, 262-270.
- 1168 Almeida, P.E., Silva, A.R., Maya-Monteiro, C.M., Töröcsik, D., D'Ávila, H., Dezsö, B.,  
1169 Magalhães, K.G., Castro-Faria-Neto, H.C., Nagy, L., and Bozza, P.T. (2009). Mycobacterium  
1170 bovis Bacillus Calmette-Guérin Infection Induces TLR2-Dependent Peroxisome Proliferator-  
1171 Activated Receptor  $\gamma$  Expression and Activation: Functions in Inflammation, Lipid Metabolism,  
1172 and Pathogenesis. *The Journal of Immunology* 183, 1337-1345.
- 1173 Amenyogbe, N., Levy, O., and Kollmann, T.R. (2015). Systems vaccinology: a promise for the  
1174 young and the poor. *Philos Trans R Soc Lond B Biol Sci* 370.
- 1175 Andersen, A., Fisker, A.B., Rodrigues, A., Martins, C., Ravn, H., Lund, N., Biering-Sorensen,  
1176 S., Benn, C.S., and Aaby, P. (2018). National Immunization Campaigns with Oral Polio Vaccine  
1177 Reduce All-Cause Mortality: A Natural Experiment within Seven Randomized Trials. *Front*  
1178 *Public Health* 6, 13.
- 1179 Angelidou, A., Conti, M.G., Diray-Arce, J., Benn, C.S., Shann, F., Netea, M.G., Liu, M., Potluri,  
1180 L.P., Sanchez-Schmitz, G., Husson, R., *et al.* (2020a). Licensed Bacille Calmette-Guerin (BCG)  
1181 formulations differ markedly in bacterial viability, RNA content and innate immune activation.  
1182 *Vaccine* 38, 2229-2240.
- 1183 Angelidou, A., Diray-Arce, J., Conti, M.G., Netea, M.G., Blok, B.A., Liu, M., Sanchez-Schmitz,  
1184 G., Ozonoff, A., van Haren, S.D., and Levy, O. (2021). Human Newborn Monocytes  
1185 Demonstrate Distinct BCG-Induced Primary and Trained Innate Cytokine Production and  
1186 Metabolic Activation In Vitro. *Front Immunol* 12, 674334.
- 1187 Angelidou, A., Diray-Arce, J., Conti, M.G., Smolen, K.K., van Haren, S.D., Dowling, D.J.,  
1188 Husson, R.N., and Levy, O. (2020b). BCG as a Case Study for Precision Vaccine Development:  
1189 Lessons From Vaccine Heterogeneity, Trained Immunity, and Immune Ontogeny. *Front*  
1190 *Microbiol* 11, 332.
- 1191 Arts, R.J.W., Moorlag, S., Novakovic, B., Li, Y., Wang, S.Y., Oosting, M., Kumar, V., Xavier,  
1192 R.J., Wijmenga, C., Joosten, L.A.B., *et al.* (2018). BCG Vaccination Protects against  
1193 Experimental Viral Infection in Humans through the Induction of Cytokines Associated with  
1194 Trained Immunity. *Cell Host Microbe* 23, 89-100 e105.
- 1195 Behar, S.M., Divangahi, M., and Remold, H.G. (2010). Evasion of innate immunity by  
1196 Mycobacterium tuberculosis: is death an exit strategy? *Nature Reviews Microbiology* 8, 668-  
1197 674.
- 1198 Biering-Sorensen, S., Aaby, P., Lund, N., Monteiro, I., Jensen, K.J., Eriksen, H.B., Scholtz-  
1199 Buchholzer, F., Jorgensen, A.S.P., Rodrigues, A., Fisker, A.B., *et al.* (2017). Early BCG-  
1200 Denmark and Neonatal Mortality Among Infants Weighing <2500 g: A Randomized Controlled  
1201 Trial. *Clin Infect Dis* 65, 1183-1190.
- 1202 Blok, B.A., de Bree, L.C.J., Diavatopoulos, D.A., Langereis, J.D., Joosten, L.A.B., Aaby, P., van  
1203 Crevel, R., Benn, C.S., and Netea, M.G. (2020). Interacting, Nonspecific, Immunological Effects  
1204 of Bacille Calmette-Guerin and Tetanus-diphtheria-pertussis Inactivated Polio Vaccinations: An  
1205 Explorative, Randomized Trial. *Clin Infect Dis* 70, 455-463.
- 1206 Boothby, M., and Rickert, R.C. (2017). Metabolic Regulation of the Immune Humoral Response.  
1207 *Immunity* 46, 743-755.
- 1208 Brook, B., Harbeson, D.J., Shannon, C.P., Cai, B., He, D., Ben-Othman, R., Francis, F., Huang,  
1209 J., Varankovich, N., Liu, A., *et al.* (2020). BCG vaccination-induced emergency granulopoiesis  
1210 provides rapid protection from neonatal sepsis. *Sci Transl Med* 12.

- 1211 Carneiro, A.B., Iaciura, B.M., Nohara, L.L., Lopes, C.D., Veas, E.M., Mariano, V.S., Bozza,  
1212 P.T., Lopes, U.G., Atella, G.C., Almeida, I.C., *et al.* (2013). Lysophosphatidylcholine triggers  
1213 TLR2- and TLR4-mediated signaling pathways but counteracts LPS-induced NO synthesis in  
1214 peritoneal macrophages by inhibiting NF-kappaB translocation and MAPK/ERK  
1215 phosphorylation. *PLoS One* 8, e76233.
- 1216 Chen, M., Divangahi, M., Gan, H., Shin, D.S.J., Hong, S., Lee, D.M., Serhan, C.N., Behar, S.M.,  
1217 and Remold, H.G. (2008). Lipid mediators in innate immunity against tuberculosis: opposing  
1218 roles of PGE2 and LXA4 in the induction of macrophage death. *Journal of Experimental*  
1219 *Medicine* 205, 2791-2801.
- 1220 Chiurchiù, V., Leuti, A., and Maccarrone, M. (2018). Bioactive Lipids and Chronic  
1221 Inflammation: Managing the Fire Within. *Frontiers in Immunology* 9.
- 1222 Clipet-Jensen, C., Andersen, A., Jensen, A.K.G., Aaby, P., and Zaman, K. (2021). Out-of-  
1223 Sequence Vaccinations With Measles Vaccine and Diphtheria-Tetanus-Pertussis Vaccine: A  
1224 Reanalysis of Demographic Surveillance Data From Rural Bangladesh. *Clin Infect Dis* 72, 1429-  
1225 1436.
- 1226 Comstock, G.W. (1988). Identification of an effective vaccine against tuberculosis. *Am Rev*  
1227 *Respir Dis* 138, 479-480.
- 1228 Conti, M.G., Angelidou, A., Diray-Arce, J., Smolen, K.K., Lasky-Su, J., De Curtis, M., and  
1229 Levy, O. (2020). Immunometabolic approaches to prevent, detect, and treat neonatal sepsis.  
1230 *Pediatr Res* 87, 399-405.
- 1231 Curtis, N., Sparrow, A., Ghebreyesus, T.A., and Netea, M.G. (2020). Considering BCG  
1232 vaccination to reduce the impact of COVID-19. *Lancet*.
- 1233 Dela Pena-Ponce, M.G., Rodriguez-Nieves, J., Bernhardt, J., Tuck, R., Choudhary, N., Mengual,  
1234 M., Mollan, K.R., Hudgens, M.G., Peter-Wohl, S., and De Paris, K. (2017). Increasing  
1235 JAK/STAT Signaling Function of Infant CD4(+) T Cells during the First Year of Life. *Front*  
1236 *Pediatr* 5, 15.
- 1237 Diray-Arce, J., Conti, M.G., Petrova, B., Kanarek, N., Angelidou, A., and Levy, O. (2020).  
1238 Integrative Metabolomics to Identify Molecular Signatures of Responses to Vaccines and  
1239 Infections. *Metabolites* 10.
- 1240 Diray-Arce, J., Miller, H.E.R., Henrich, E., Gerritsen, B., Mulè, M.P., Fourati, S., Gygi, J.,  
1241 Hagan, T., Tomalin, L., Rychkov, D., *et al.* (2021). The Immune Signatures Data Resource: A  
1242 compendium of systems vaccinology datasets. *bioRxiv*, 2021.2011.2005.465336.
- 1243 Dowling, D.J., and Levy, O. (2014). Ontogeny of early life immunity. *Trends Immunol* 35, 299-  
1244 310.
- 1245 Evans, A.M., DeHaven, C.D., Barrett, T., Mitchell, M., and Milgram, E. (2009). Integrated,  
1246 Nontargeted Ultrahigh Performance Liquid Chromatography/Electrospray Ionization Tandem  
1247 Mass Spectrometry Platform for the Identification and Relative Quantification of the Small-  
1248 Molecule Complement of Biological Systems. *Analytical Chemistry* 81, 6656-6667.
- 1249 Fanos, V., Atzori, L., Makarenko, K., Melis, G.B., and Ferrazzi, E. (2013). Metabolomics  
1250 application in maternal-fetal medicine. *Biomed Res Int* 2013, 720514.
- 1251 Faustman, D.L. (2020). Benefits of BCG-induced metabolic switch from oxidative  
1252 phosphorylation to aerobic glycolysis in autoimmune and nervous system diseases. *J Intern Med*.
- 1253 Fok, E.T., Davignon, L., Fanucchi, S., and Mhlanga, M.M. (2019). The lncRNA Connection  
1254 Between Cellular Metabolism and Epigenetics in Trained Immunity. *Frontiers in Immunology* 9.
- 1255 Freyne, B., Donath, S., Germano, S., Gardiner, K., Casalez, D., Robins-Browne, R.M.,  
1256 Amenogbe, N., Messina, N.L., Netea, M.G., Flanagan, K.L., *et al.* (2018). Neonatal BCG



- 1257 Vaccination Influences Cytokine Responses to Toll-like Receptor Ligands and Heterologous  
1258 Antigens. *J Infect Dis* 217, 1798-1808.
- 1259 Guijas, C., Montenegro-Burke, J.R., Warth, B., Spilker, M.E., and Siuzdak, G. (2018).  
1260 Metabolomics activity screening for identifying metabolites that modulate phenotype. *Nature*  
1261 *Biotechnology* 36, 316-320.
- 1262 Haahr, S., Michelsen, S.W., Andersson, M., Bjorn-Mortensen, K., Soborg, B., Wohlfahrt, J.,  
1263 Melbye, M., and Koch, A. (2016). Non-specific effects of BCG vaccination on morbidity among  
1264 children in Greenland: a population-based cohort study. *Int J Epidemiol* 45, 2122-2130.
- 1265 Hagan, T., Nakaya, H.I., Subramaniam, S., and Pulendran, B. (2015). Systems vaccinology:  
1266 Enabling rational vaccine design with systems biological approaches. *Vaccine* 33, 5294-5301.
- 1267 Higgins, J.P., Soares-Weiser, K., Lopez-Lopez, J.A., Kakourou, A., Chaplin, K., Christensen, H.,  
1268 Martin, N.K., Sterne, J.A., and Reingold, A.L. (2016). Association of BCG, DTP, and measles  
1269 containing vaccines with childhood mortality: systematic review. *BMJ* 355, i5170.
- 1270 Jensen, K.J., Larsen, N., Biering-Sorensen, S., Andersen, A., Eriksen, H.B., Monteiro, I.,  
1271 Hougaard, D., Aaby, P., Netea, M.G., Flanagan, K.L., *et al.* (2015). Heterologous immunological  
1272 effects of early BCG vaccination in low-birth-weight infants in Guinea-Bissau: a randomized-  
1273 controlled trial. *J Infect Dis* 211, 956-967.
- 1274 Jia, P., Wang, Q., Chen, Q., Hutchinson, K.E., Pao, W., and Zhao, Z. (2014). MSEA: detection  
1275 and quantification of mutation hotspots through mutation set enrichment analysis. *Genome Biol*  
1276 15, 489.
- 1277 Johnson, C.H., Ivanisevic, J., and Siuzdak, G. (2016). Metabolomics: beyond biomarkers and  
1278 towards mechanisms. *Nature Reviews Molecular Cell Biology* 17, 451-459.
- 1279 Kan, B., Michalski, C., Fu, H., Au, H.H.T., Lee, K., Marchant, E.A., Cheng, M.F., Anderson-  
1280 Baucum, E., Aharoni-Simon, M., Tilley, P., *et al.* (2018). Cellular metabolism constrains innate  
1281 immune responses in early human ontogeny. *Nat Commun* 9, 4822.
- 1282 Kelly, B., and O'Neill, L.A. (2015). Metabolic reprogramming in macrophages and dendritic  
1283 cells in innate immunity. *Cell Res* 25, 771-784.
- 1284 Kjaergaard, J., Birk, N.M., Nissen, T.N., Thostesen, L.M., Pihl, G.T., Benn, C.S., Jeppesen,  
1285 D.L., Pryds, O., Kofoed, P.E., Aaby, P., *et al.* (2016). Nonspecific effect of BCG vaccination at  
1286 birth on early childhood infections: a randomized, clinical multicenter trial. *Pediatr Res* 80, 681-  
1287 685.
- 1288 Kleinnijenhuis, J., Quintin, J., Preijers, F., Joosten, L.A., Ifrim, D.C., Saeed, S., Jacobs, C., van  
1289 Loenhout, J., de Jong, D., Stunnenberg, H.G., *et al.* (2012). Bacille Calmette-Guerin induces  
1290 NOD2-dependent nonspecific protection from reinfection via epigenetic reprogramming of  
1291 monocytes. *Proc Natl Acad Sci U S A* 109, 17537-17542.
- 1292 Knuplez, E., and Marsche, G. (2020). An Updated Review of Pro- and Anti-Inflammatory  
1293 Properties of Plasma Lysophosphatidylcholines in the Vascular System. *Int J Mol Sci* 21.
- 1294 Kollmann, T.R. (2013). Variation between Populations in the Innate Immune Response to  
1295 Vaccine Adjuvants. *Front Immunol* 4, 81.
- 1296 Langley, R.J., Tsalik, E.L., van Velkinburgh, J.C., Glickman, S.W., Rice, B.J., Wang, C., Chen,  
1297 B., Carin, L., Suarez, A., Mohny, R.P., *et al.* (2013). An integrated clinico-metabolomic model  
1298 improves prediction of death in sepsis. *Sci Transl Med* 5, 195ra195.
- 1299 Law, S.H., Chan, M.L., Marathe, G.K., Parveen, F., Chen, C.H., and Ke, L.Y. (2019). An  
1300 Updated Review of Lysophosphatidylcholine Metabolism in Human Diseases. *Int J Mol Sci* 20.

- 1301 Lawton, K.A., Berger, A., Mitchell, M., Milgram, K.E., Evans, A.M., Guo, L., Hanson, R.W.,  
1302 Kalhan, S.C., Ryals, J.A., and Milburn, M.V. (2008). Analysis of the adult human plasma  
1303 metabolome. *Pharmacogenomics* 9, 383-397.
- 1304 Lee, A.H., Shannon, C.P., Amenyogbe, N., Bennike, T.B., Diray-Arce, J., Idoko, O.T., Gill,  
1305 E.E., Ben-Othman, R., Pomat, W.S., van Haren, S.D., *et al.* (2019). Dynamic molecular changes  
1306 during the first week of human life follow a robust developmental trajectory. *Nat Commun* 10,  
1307 1092.
- 1308 Lee, H.-J., Ko, H.-J., Song, D.-K., and Jung, Y.-J. (2018). Lysophosphatidylcholine Promotes  
1309 Phagosome Maturation and Regulates Inflammatory Mediator Production Through the Protein  
1310 Kinase A–Phosphatidylinositol 3–Kinase–p38 Mitogen-Activated Protein Kinase Signaling  
1311 Pathway During Mycobacterium tuberculosis Infection in Mouse Macrophages. *Frontiers in*  
1312 *Immunology* 9.
- 1313 Li, S., Sullivan, N.L., Roupheal, N., Yu, T., Banton, S., Maddur, M.S., McCausland, M., Chiu,  
1314 C., Canniff, J., Dubey, S., *et al.* (2017). Metabolic Phenotypes of Response to Vaccination in  
1315 Humans. *Cell* 169, 862-877 e817.
- 1316 Li, Z., Xie, Y., Xiao, Q., and Wang, L. (2020). Terminal osseous dysplasia with pigmentary  
1317 defects in a Chinese girl with the FLNA mutation: A case report and published work review. *J*  
1318 *Dermatol* 47, 295-299.
- 1319 Libraty, D.H., Zhang, L., Woda, M., Acosta, L.P., Obcena, A., Brion, J.D., and Capeding, R.Z.  
1320 (2014). Neonatal BCG vaccination is associated with enhanced T-helper 1 immune responses to  
1321 heterologous infant vaccines. *Trials Vaccinol* 3, 1-5.
- 1322 Lochner, M., Berod, L., and Sparwasser, T. (2015). Fatty acid metabolism in the regulation of T  
1323 cell function. *Trends Immunol* 36, 81-91.
- 1324 Lofgren, L., Stahlman, M., Forsberg, G.B., Saarinen, S., Nilsson, R., and Hansson, G.I. (2012).  
1325 The BUMe method: a novel automated chloroform-free 96-well total lipid extraction method for  
1326 blood plasma. *J Lipid Res* 53, 1690-1700.
- 1327 Long, T., Hicks, M., Yu, H.C., Biggs, W.H., Kirkness, E.F., Menni, C., Zierer, J., Small, K.S.,  
1328 Mangino, M., Messier, H., *et al.* (2017). Whole-genome sequencing identifies common-to-rare  
1329 variants associated with human blood metabolites. *Nat Genet* 49, 568-578.
- 1330 Lund, N., Andersen, A., Hansen, A.S., Jepsen, F.S., Barbosa, A., Biering-Sorensen, S.,  
1331 Rodrigues, A., Ravn, H., Aaby, P., and Benn, C.S. (2015). The Effect of Oral Polio Vaccine at  
1332 Birth on Infant Mortality: A Randomized Trial. *Clin Infect Dis* 61, 1504-1511.
- 1333 Marchant, A., Goetghebuer, T., Ota, M.O., Wolfe, I., Ceesay, S.J., De Groote, D., Corrah, T.,  
1334 Bennett, S., Wheeler, J., Huygen, K., *et al.* (1999). Newborns develop a Th1-type immune  
1335 response to Mycobacterium bovis bacillus Calmette-Guerin vaccination. *J Immunol* 163, 2249-  
1336 2255.
- 1337 McFarland, C.T., Fan, Y.Y., Chapkin, R.S., Weeks, B.R., and McMurray, D.N. (2008). Dietary  
1338 polyunsaturated fatty acids modulate resistance to Mycobacterium tuberculosis in guinea pigs. *J*  
1339 *Nutr* 138, 2123-2128.
- 1340 Members, M.S.I.B., Sansone, S.A., Fan, T., Goodacre, R., Griffin, J.L., Hardy, N.W., Kaddurah-  
1341 Daouk, R., Kristal, B.S., Lindon, J., Mendes, P., *et al.* (2007). The metabolomics standards  
1342 initiative. *Nat Biotechnol* 25, 846-848.
- 1343 Moorlag, S., Arts, R.J.W., van Crevel, R., and Netea, M.G. (2019). Non-specific effects of BCG  
1344 vaccine on viral infections. *Clin Microbiol Infect* 25, 1473-1478.
- 1345 Moorlag, S., van Deuren, R.C., van Werkhoven, C.H., Jaeger, M., Debisarun, P., Taks, E.,  
1346 Mourits, V.P., Koeken, V., de Bree, L.C.J., Ten Doesschate, T., *et al.* (2020). Safety and

- 1347 COVID-19 Symptoms in Individuals Recently Vaccinated with BCG: a Retrospective Cohort  
1348 Study. *Cell Rep Med* 1, 100073.
- 1349 Mussap, M., Antonucci, R., Noto, A., and Fanos, V. (2013). The role of metabolomics in  
1350 neonatal and pediatric laboratory medicine. *Clin Chim Acta* 426, 127-138.
- 1351 Nakaya, H.I., Clutterbuck, E., Kazmin, D., Wang, L., Cortese, M., Bosinger, S.E., Patel, N.B.,  
1352 Zak, D.E., Aderem, A., Dong, T., *et al.* (2016). Systems biology of immunity to MF59-  
1353 adjuvanted versus nonadjuvanted trivalent seasonal influenza vaccines in early childhood. *Proc*  
1354 *Natl Acad Sci U S A* 113, 1853-1858.
- 1355 Nakaya, H.I., Wrammert, J., Lee, E.K., Racioppi, L., Marie-Kunze, S., Haining, W.N., Means,  
1356 A.R., Kasturi, S.P., Khan, N., Li, G.M., *et al.* (2011). Systems biology of vaccination for  
1357 seasonal influenza in humans. *Nat Immunol* 12, 786-795.
- 1358 Netea, M.G., Joosten, L.A., Latz, E., Mills, K.H., Natoli, G., Stunnenberg, H.G., O'Neill, L.A.,  
1359 and Xavier, R.J. (2016). Trained immunity: A program of innate immune memory in health and  
1360 disease. *Science* 352, aaf1098.
- 1361 O'Neill, L.A., Kishton, R.J., and Rathmell, J. (2016). A guide to immunometabolism for  
1362 immunologists. *Nat Rev Immunol* 16, 553-565.
- 1363 Ojala, P.J., Hirvonen, T.E., Hermansson, M., Somerharju, P., and Parkkinen, J. (2007). Acyl  
1364 chain-dependent effect of lysophosphatidylcholine on human neutrophils. *J Leukoc Biol* 82,  
1365 1501-1509.
- 1366 Okita, M., Gaudette, D.C., Mills, G.B., and Holub, B.J. (1997). Elevated levels and altered fatty  
1367 acid composition of plasma lysophosphatidylcholine(lysoPC) in ovarian cancer patients. *Int J*  
1368 *Cancer* 71, 31-34.
- 1369 Perrin-Cocon, L., Agaogue, S., Coutant, F., Saint-Mezard, P., Guironnet-Paquet, A., Nicolas,  
1370 J.F., Andre, P., and Lotteau, V. (2006). Lysophosphatidylcholine is a natural adjuvant that  
1371 initiates cellular immune responses. *Vaccine* 24, 1254-1263.
- 1372 Petrick, L.M., Schiffman, C., Edmands, W.M.B., Yano, Y., Perttula, K., Whitehead, T., Metayer,  
1373 C., Wheelock, C.E., Arora, M., Grigoryan, H., *et al.* (2019). Metabolomics of neonatal blood  
1374 spots reveal distinct phenotypes of pediatric acute lymphoblastic leukemia and potential effects  
1375 of early-life nutrition. *Cancer Lett* 452, 71-78.
- 1376 Pettengill, M.A., van Haren, S.D., and Levy, O. (2014). Soluble mediators regulating immunity  
1377 in early life. *Front Immunol* 5, 457.
- 1378 Playdon, M.C., Ziegler, R.G., Sampson, J.N., Stolzenberg-Solomon, R., Thompson, H.J., Irwin,  
1379 M.L., Mayne, S.T., Hoover, R.N., and Moore, S.C. (2017). Nutritional metabolomics and breast  
1380 cancer risk in a prospective study. *Am J Clin Nutr* 106, 637-649.
- 1381 Prentice, S., Nassanga, B., Webb, E.L., Akello, F., Kiwudhu, F., Akurut, H., Elliott, A.M., Arts,  
1382 R.J.W., Netea, M.G., Dockrell, H.M., *et al.* (2021). BCG-induced non-specific effects on  
1383 heterologous infectious disease in Ugandan neonates: an investigator-blind randomised  
1384 controlled trial. *Lancet Infect Dis* 21, 993-1003.
- 1385 Reinke, S.N., Walsh, B.H., Boylan, G.B., Sykes, B.D., Kenny, L.C., Murray, D.M., and  
1386 Broadhurst, D.I. (2013). <sup>1</sup>H NMR derived metabolomic profile of neonatal asphyxia in umbilical  
1387 cord serum: implications for hypoxic ischemic encephalopathy. *J Proteome Res* 12, 4230-4239.
- 1388 Rothman, K.J. (1990). No Adjustments Are Needed for Multiple Comparisons. *Epidemiology* 1,  
1389 43-46.
- 1390 Sanchez-Schmitz, G., and Levy, O. (2011). Development of newborn and infant vaccines. *Sci*  
1391 *Transl Med* 3, 90ps27.

- 1392 Sanchez-Schmitz, G., Stevens, C.R., Bettencourt, I.A., Flynn, P.J., Schmitz-Abe, K., Metser, G.,  
1393 Hamm, D., Jensen, K.J., Benn, C., and Levy, O. (2018). Microphysiologic Human Tissue  
1394 Constructs Reproduce Autologous Age-Specific BCG and HBV Primary Immunization in vitro.  
1395 *Front Immunol* 9, 2634.
- 1396 Scheid, A., Borriello, F., Pietrasanta, C., Christou, H., Diray-Arce, J., Pettengill, M.A., Joshi, S.,  
1397 Li, N., Bergelson, I., Kollmann, T., *et al.* (2018). Adjuvant Effect of Bacille Calmette-Guerin on  
1398 Hepatitis B Vaccine Immunogenicity in the Preterm and Term Newborn. *Front Immunol* 9, 29.
- 1399 Sharma, N., Akhade, A.S., Ismaeel, S., and Qadri, A. (2020). Serum-borne lipids amplify TLR-  
1400 activated inflammatory responses. *J Leukoc Biol.*
- 1401 Skogstrand, K., Thorsen, P., Norgaard-Pedersen, B., Schendel, D.E., Sorensen, L.C., and  
1402 Hougaard, D.M. (2005). Simultaneous measurement of 25 inflammatory markers and  
1403 neurotrophins in neonatal dried blood spots by immunoassay with xMAP technology. *Clin Chem*  
1404 *51*, 1854-1866.
- 1405 Soehnlein, O., Lindbom, L., and Weber, C. (2009). Mechanisms underlying neutrophil-mediated  
1406 monocyte recruitment. *Blood* *114*, 4613-4623.
- 1407 Sorup, S., Benn, C.S., Poulsen, A., Krause, T.G., Aaby, P., and Ravn, H. (2016). Simultaneous  
1408 vaccination with MMR and DTaP-IPV-Hib and rate of hospital admissions with any infections:  
1409 A nationwide register based cohort study. *Vaccine* *34*, 6172-6180.
- 1410 Spicer, R.A., Salek, R., and Steinbeck, C. (2017). A decade after the metabolomics standards  
1411 initiative it's time for a revision. *Sci Data* *4*, 170138.
- 1412 Stenzen, J.A., and Poschenrieder, A.J. (2015). Bioanalytical chemistry of cytokines--a review.  
1413 *Anal Chim Acta* *853*, 95-115.
- 1414 Sumner, L.W., Amberg, A., Barrett, D., Beale, M.H., Berger, R., Daykin, C.A., Fan, T.W., Fiehn,  
1415 O., Goodacre, R., Griffin, J.L., *et al.* (2007). Proposed minimum reporting standards for  
1416 chemical analysis Chemical Analysis Working Group (CAWG) Metabolomics Standards  
1417 Initiative (MSI). *Metabolomics* *3*, 211-221.
- 1418 Thyssen, S.M., Rodrigues, A., Aaby, P., and Fisker, A.B. (2019). Out-of-sequence DTP and  
1419 measles vaccinations and child mortality in Guinea-Bissau: a reanalysis. *BMJ Open* *9*, e024893.
- 1420 Uhl, O., Fleddermann, M., Hellmuth, C., Demmelmair, H., and Koletzko, B. (2016).  
1421 Phospholipid Species in Newborn and 4 Month Old Infants after Consumption of Different  
1422 Formulas or Breast Milk. *PLoS one* *11*, e0162040.
- 1423 Welaga, P., Oduro, A., Debpuur, C., Aaby, P., Ravn, H., Andersen, A., Binka, F., and Hodgson,  
1424 A. (2017). Fewer out-of-sequence vaccinations and reduction of child mortality in Northern  
1425 Ghana. *Vaccine* *35*, 2496-2503.
- 1426 White, O.J., McKenna, K.L., Bosco, A., A, H.J.v.d.B., Richmond, P., and Holt, P.G. (2012). A  
1427 genomics-based approach to assessment of vaccine safety and immunogenicity in children.  
1428 *Vaccine* *30*, 1865-1874.
- 1429 Whittaker, E., Goldblatt, D., McIntyre, P., and Levy, O. (2018). Neonatal Immunization:  
1430 Rationale, Current State, and Future Prospects. *Front Immunol* *9*, 532.
- 1431 World Health, O. (2020). Children: Improving Survival and Well-being.
- 1432 Xia, J., Sinelnikov, I.V., Han, B., and Wishart, D.S. (2015). MetaboAnalyst 3.0--making  
1433 metabolomics more meaningful. *Nucleic Acids Res* *43*, W251-257.
- 1434 Xia, J., and Wishart, D.S. (2011). Metabolomic data processing, analysis, and interpretation  
1435 using MetaboAnalyst. *Curr Protoc Bioinformatics Chapter 14*, Unit 14 10.
- 1436 Xia, J., and Wishart, D.S. (2016). Using MetaboAnalyst 3.0 for Comprehensive Metabolomics  
1437 Data Analysis. *Curr Protoc Bioinformatics* *55*, 14 10 11-14 10 91.

1438 Yan, J.-J., Jung, J.-S., Lee, J.-E., Lee, J., Huh, S.-O., Kim, H.-S., Jung, K.C., Cho, J.-Y., Nam, J.-  
1439 S., Suh, H.-W., *et al.* (2004). Therapeutic effects of lysophosphatidylcholine in experimental  
1440 sepsis. *Nature Medicine* *10*, 161-167.  
1441 Zimmermann, P., Donath, S., Perrett, K.P., Messina, N.L., Ritz, N., Netea, M.G., Flanagan, K.L.,  
1442 van der Klis, F.R.M., Curtis, N., and group, M.B. (2019). The influence of neonatal Bacille  
1443 Calmette-Guerin (BCG) immunisation on heterologous vaccine responses in infants. *Vaccine* *37*,  
1444 3735-3744.  
1445  
1446

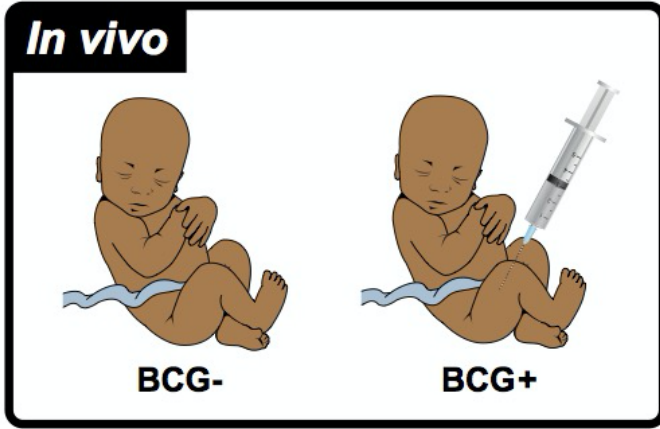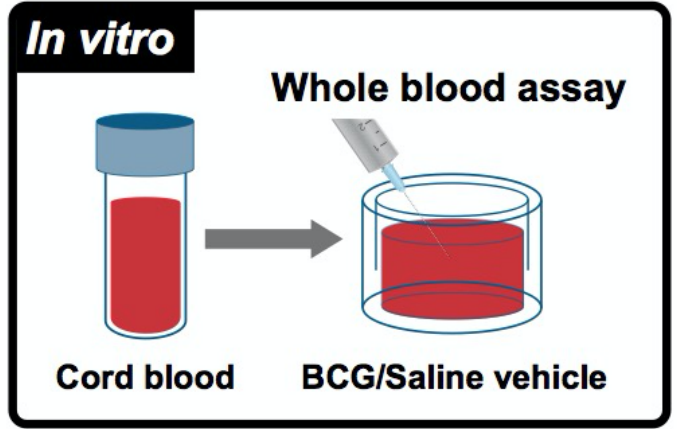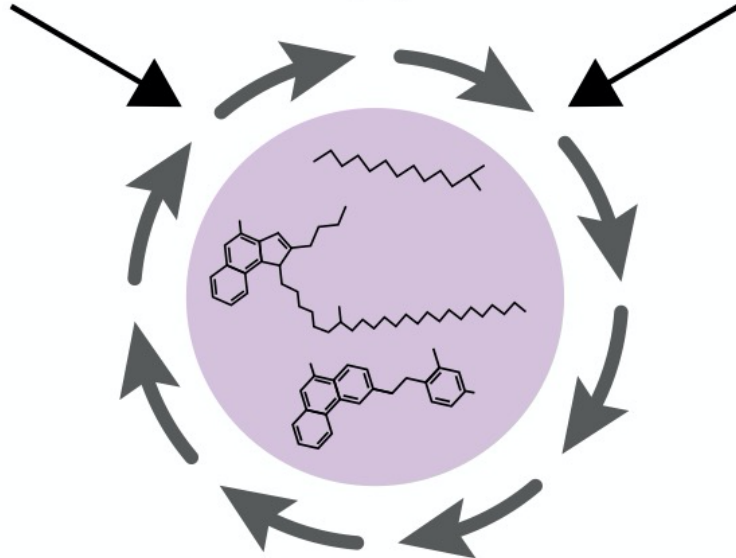

**Metabolic changes  
induced by BCG vaccine**

## A In Vivo Assay: Guinea-Bissau Cohort

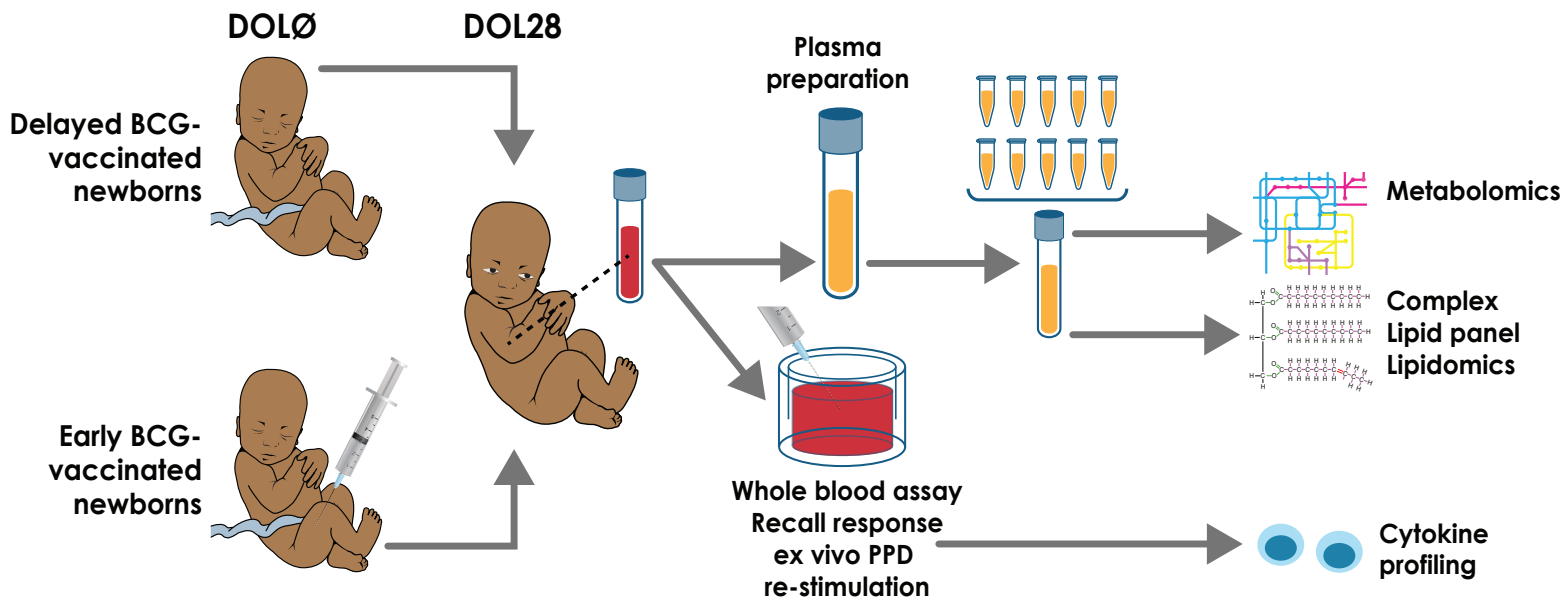

## B In Vitro Assay: Boston Cohort

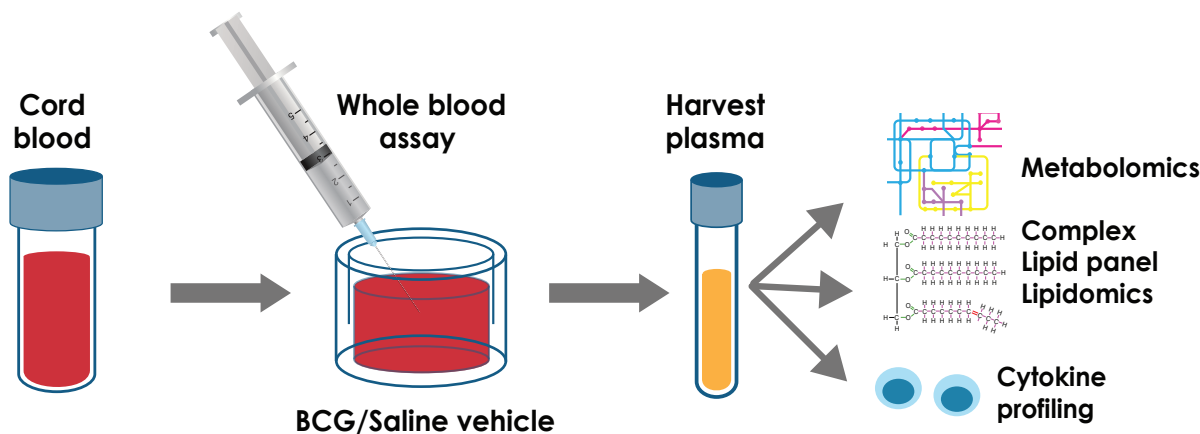

## C Validation Cohort: EPIC-001 Gambia pilot cohort

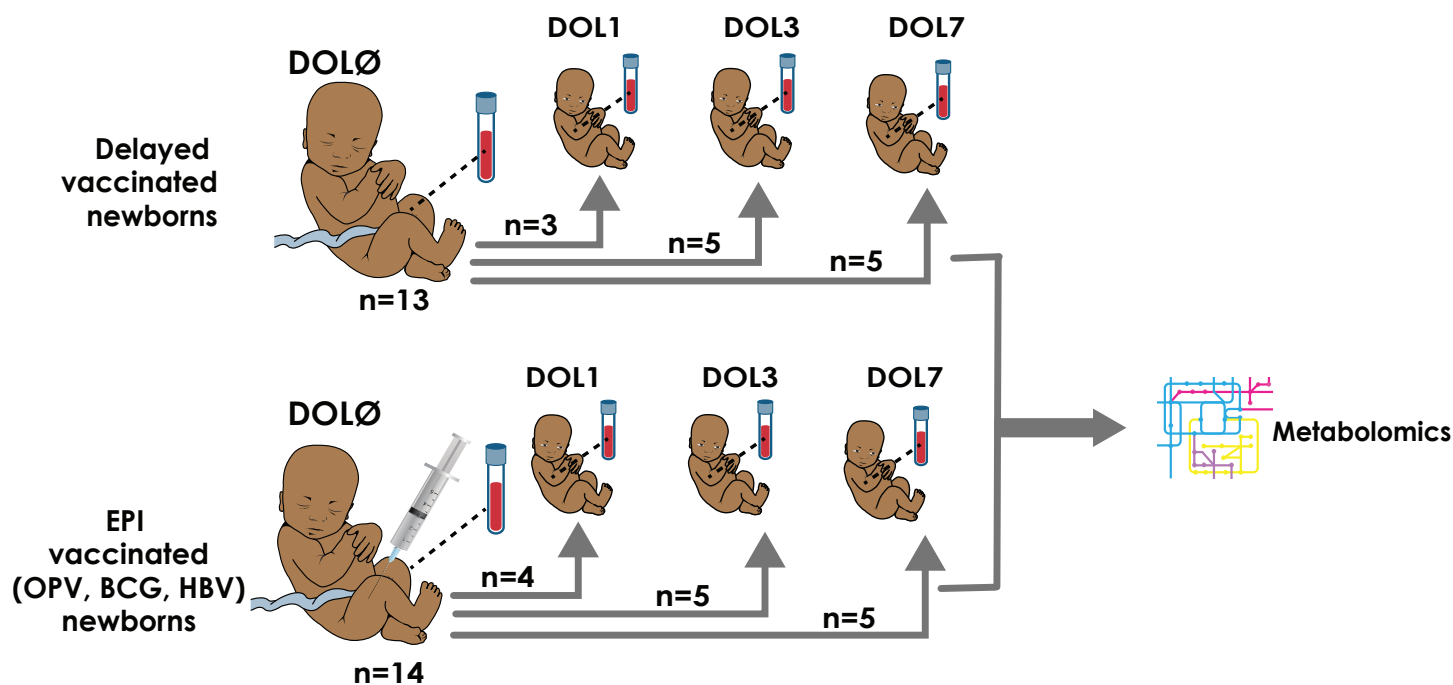

**A****In vivo sampling procedures**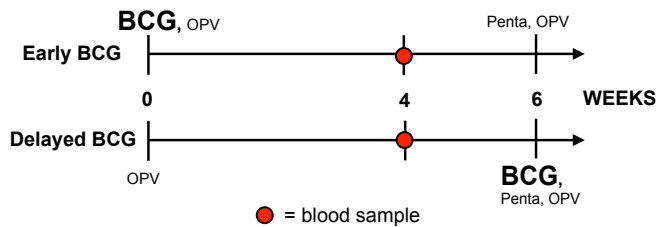**B**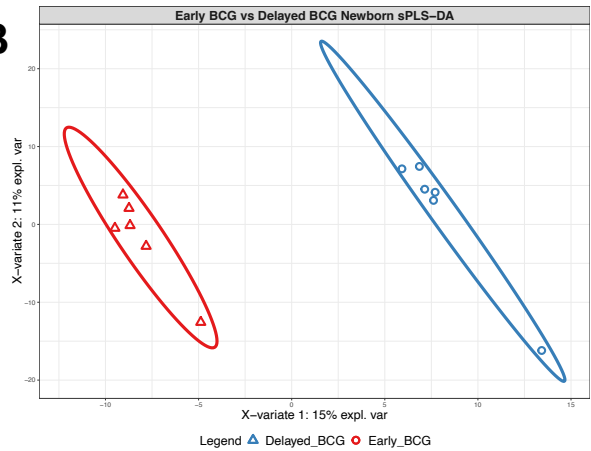**C****Top 35 Loadings (Early BCG vs Delayed BCG)**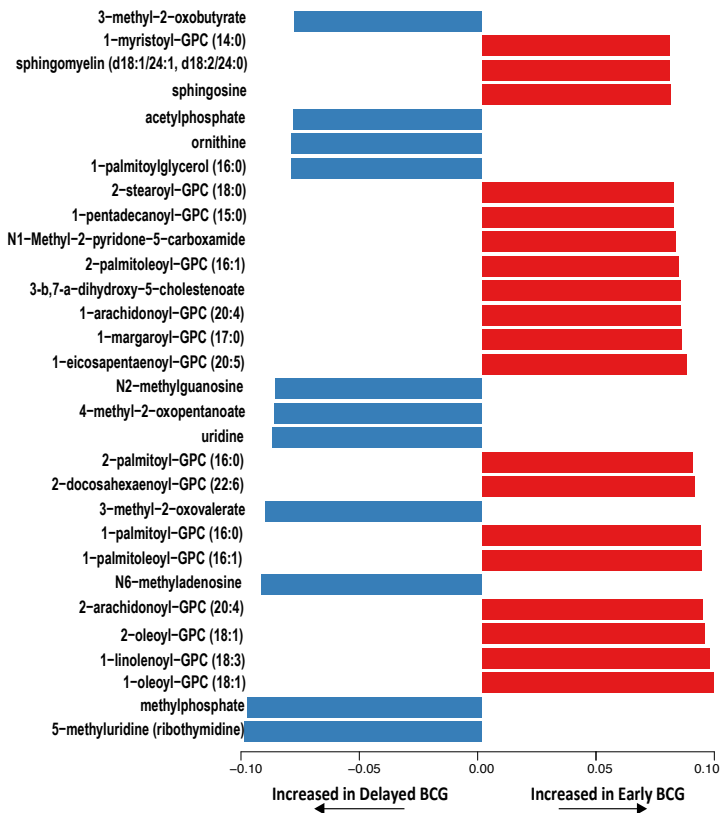**D**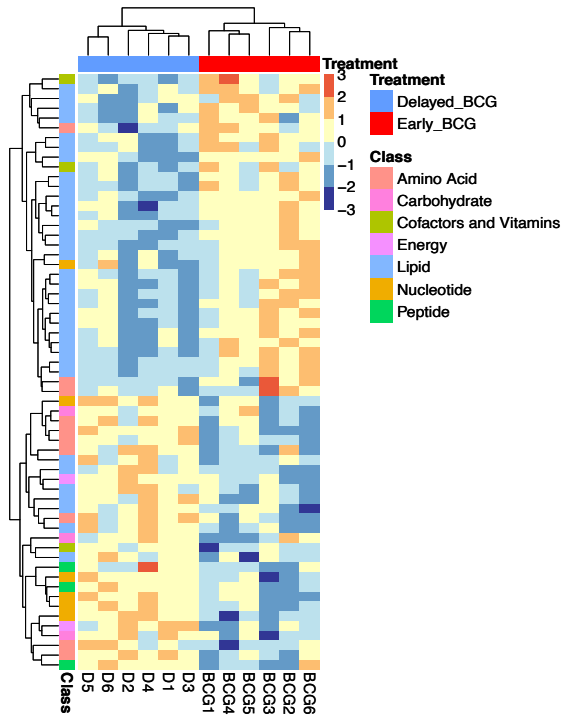**E**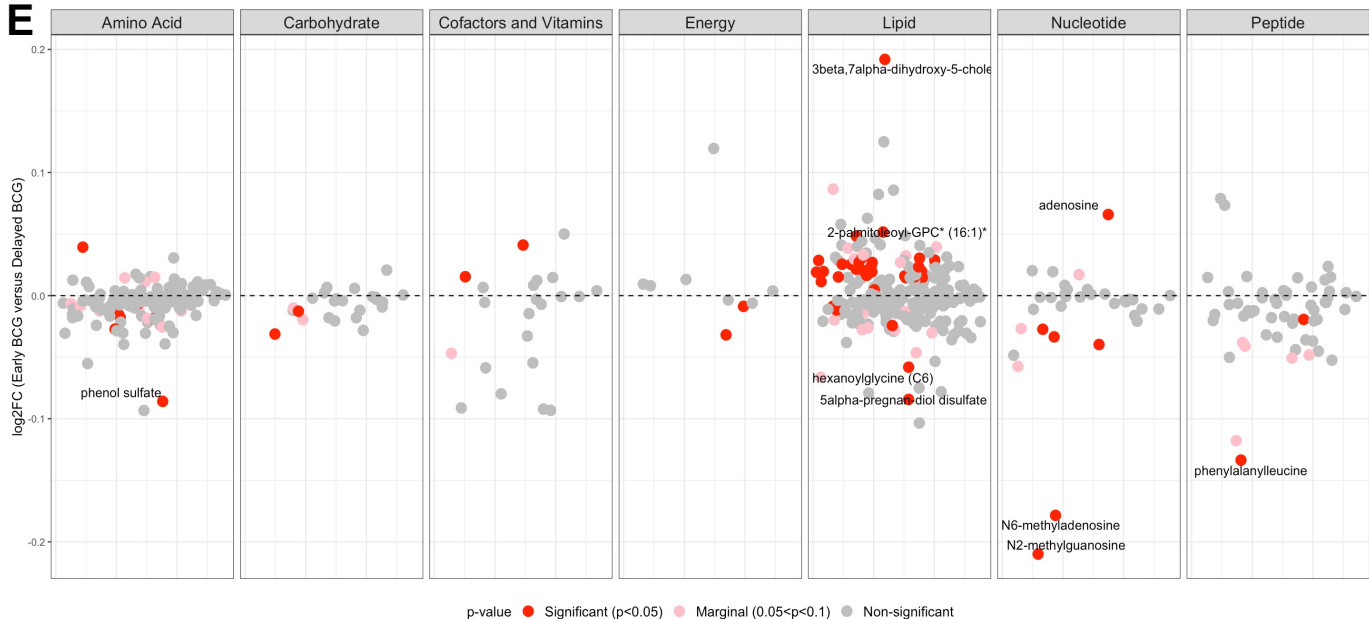



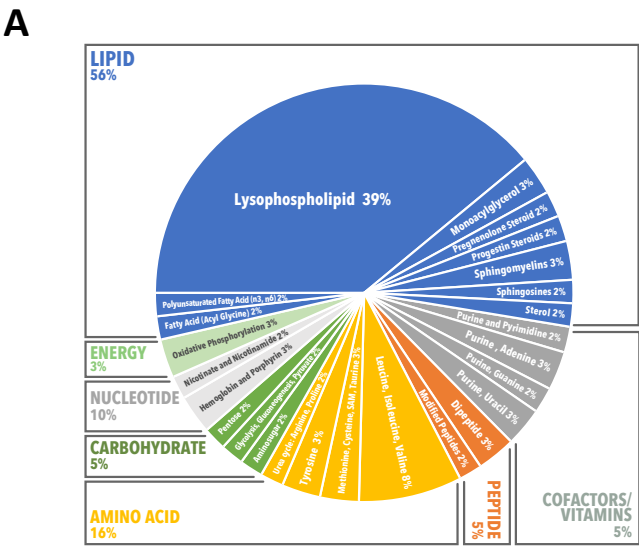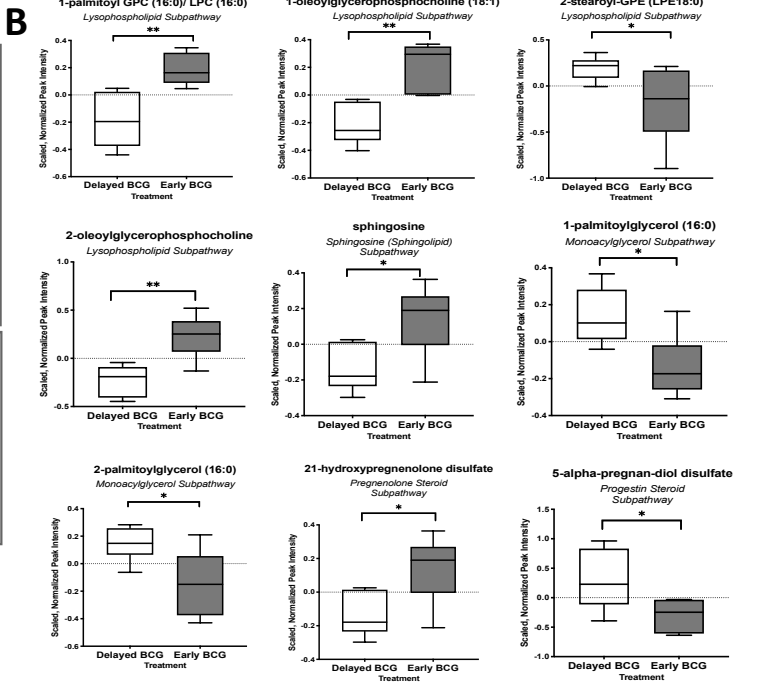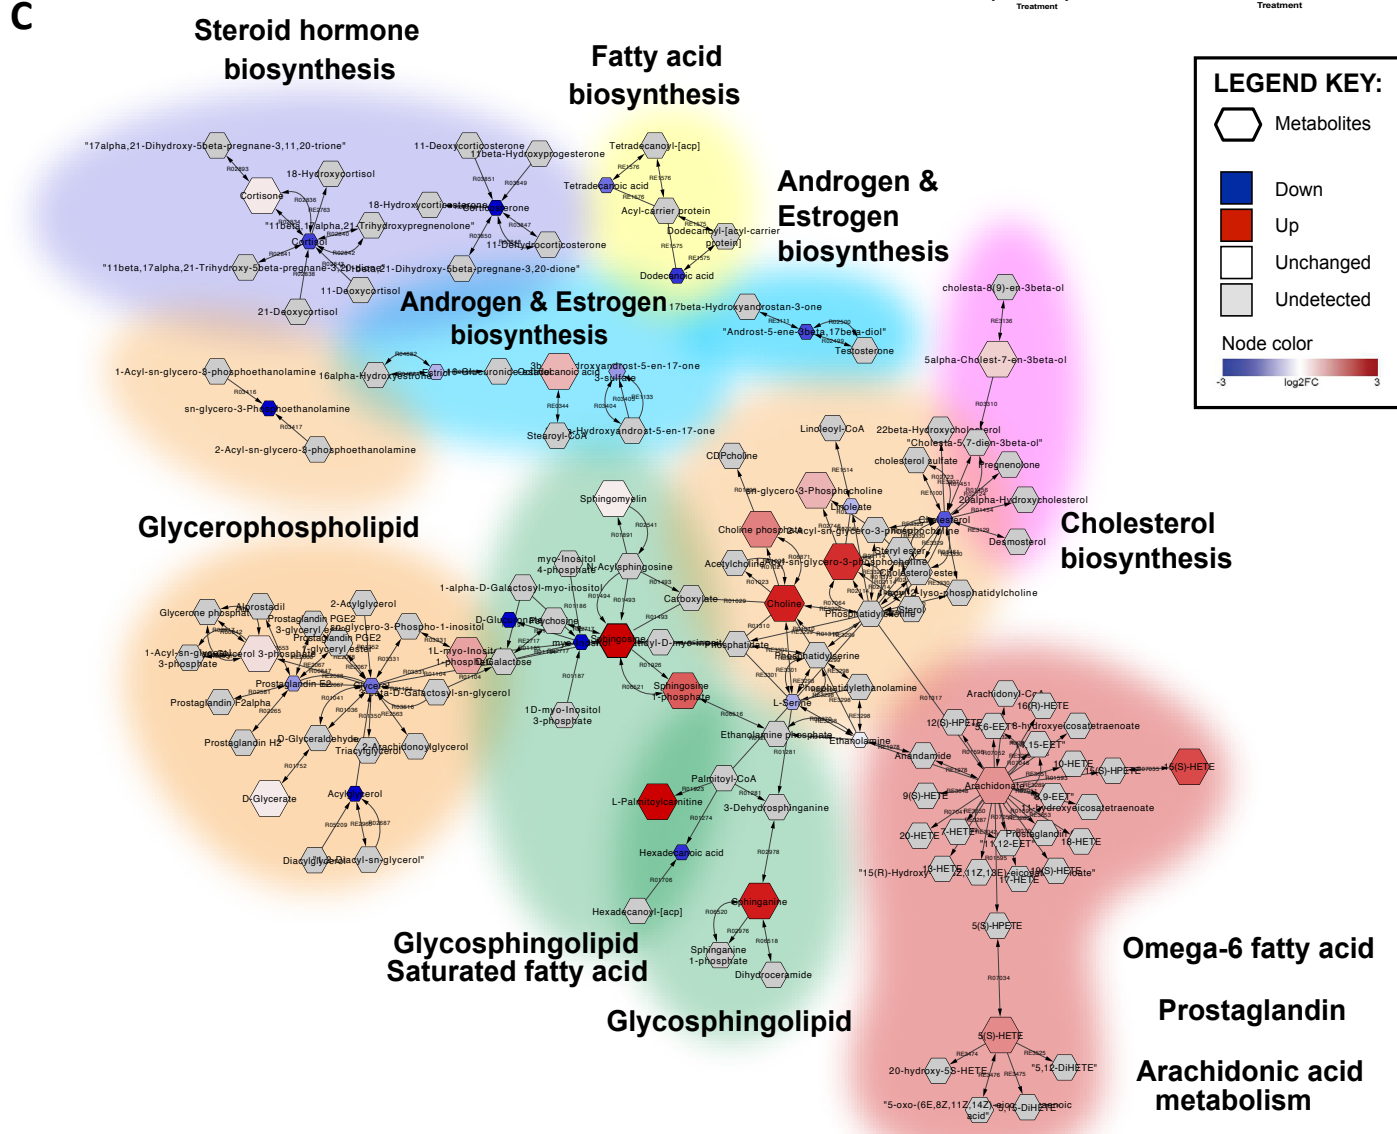

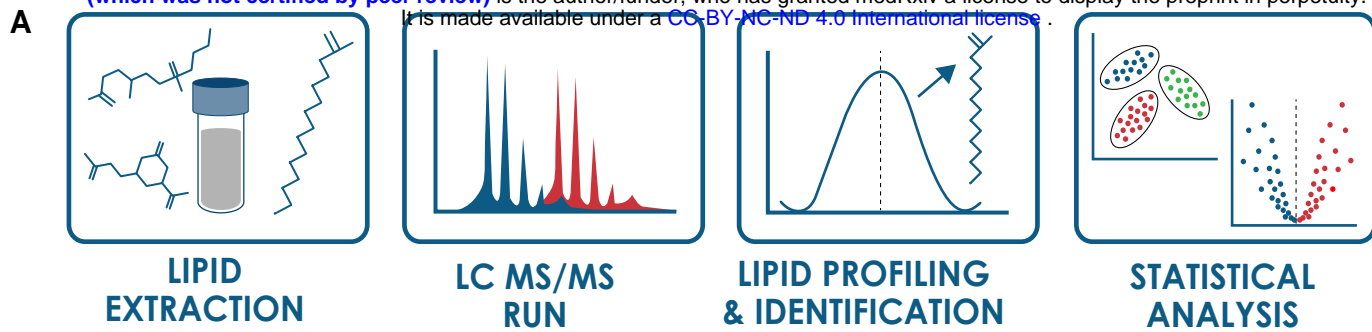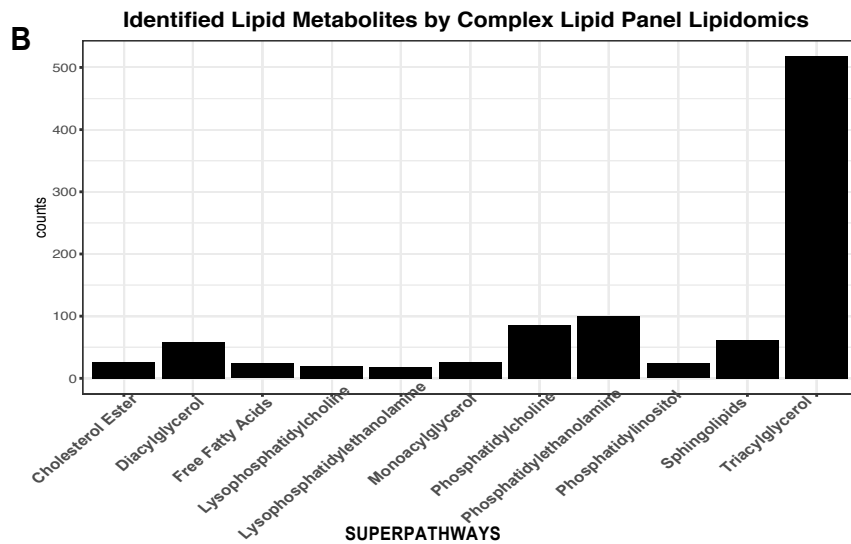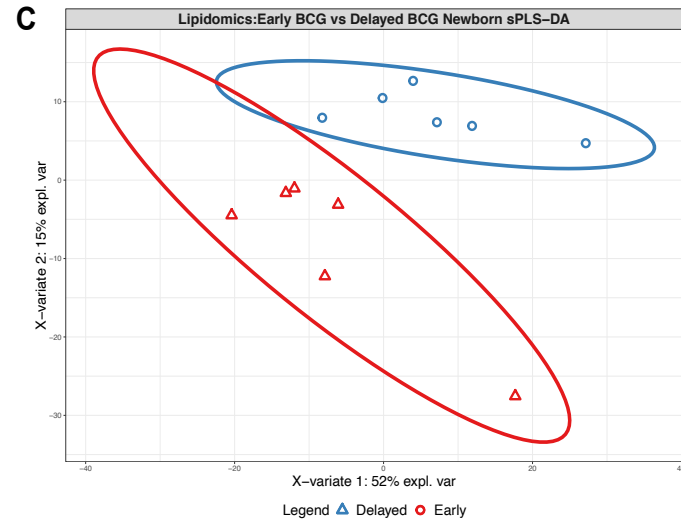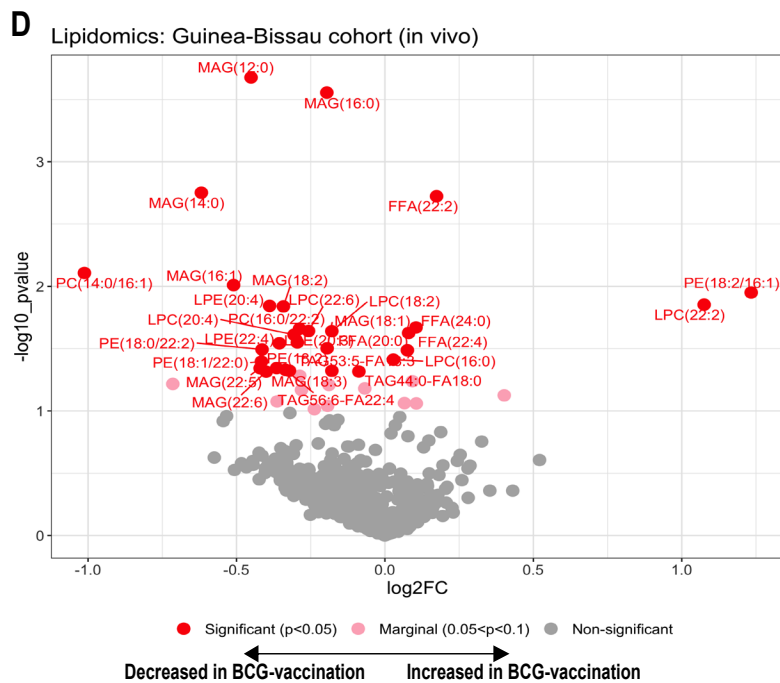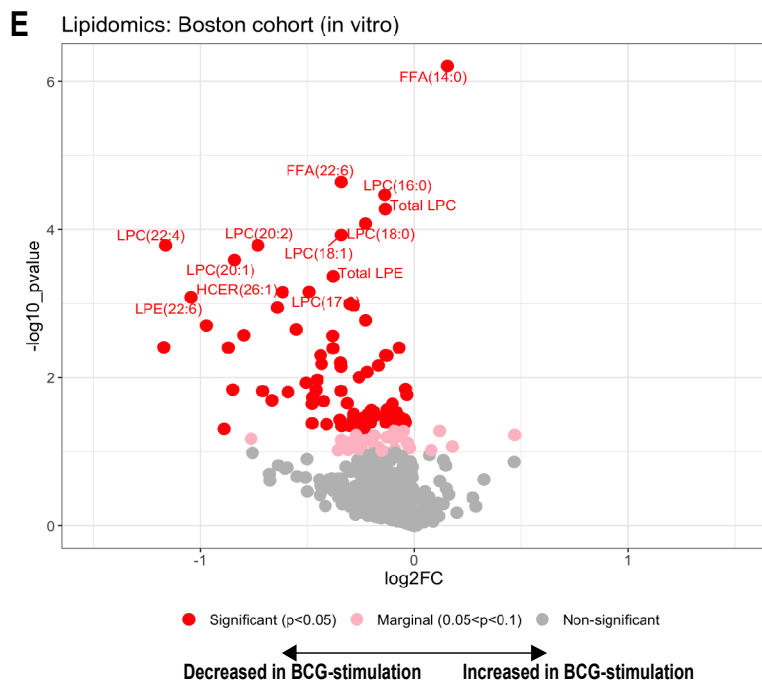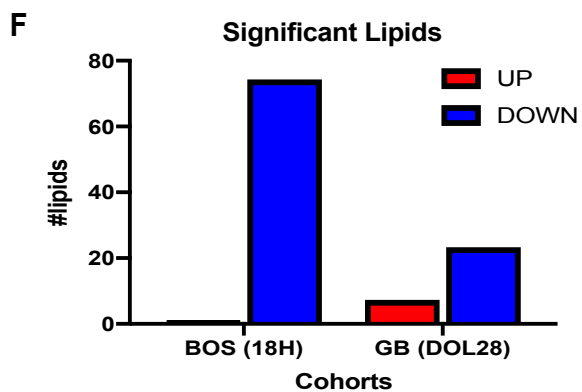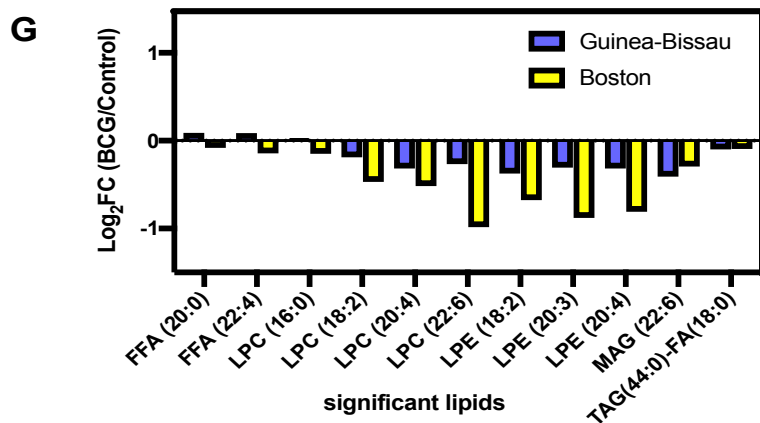

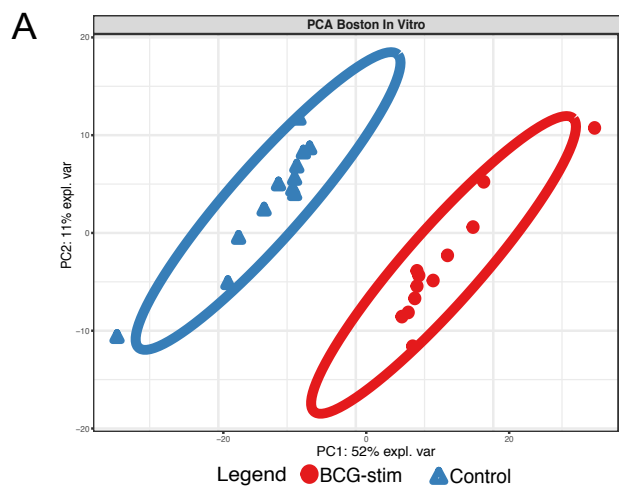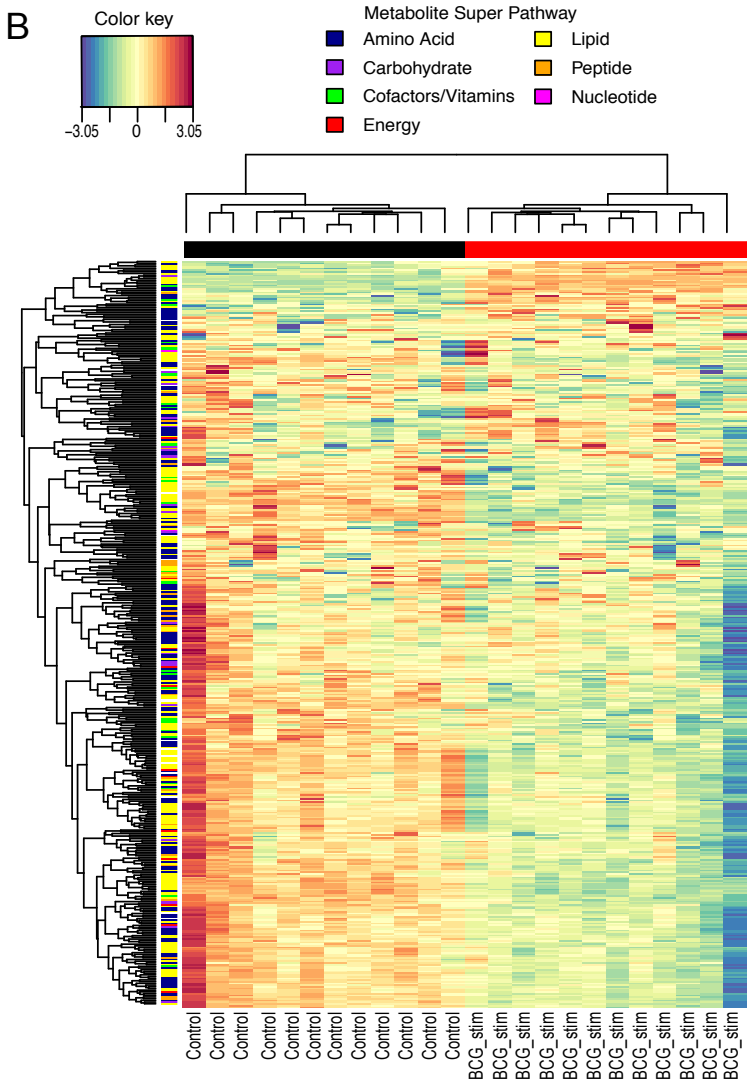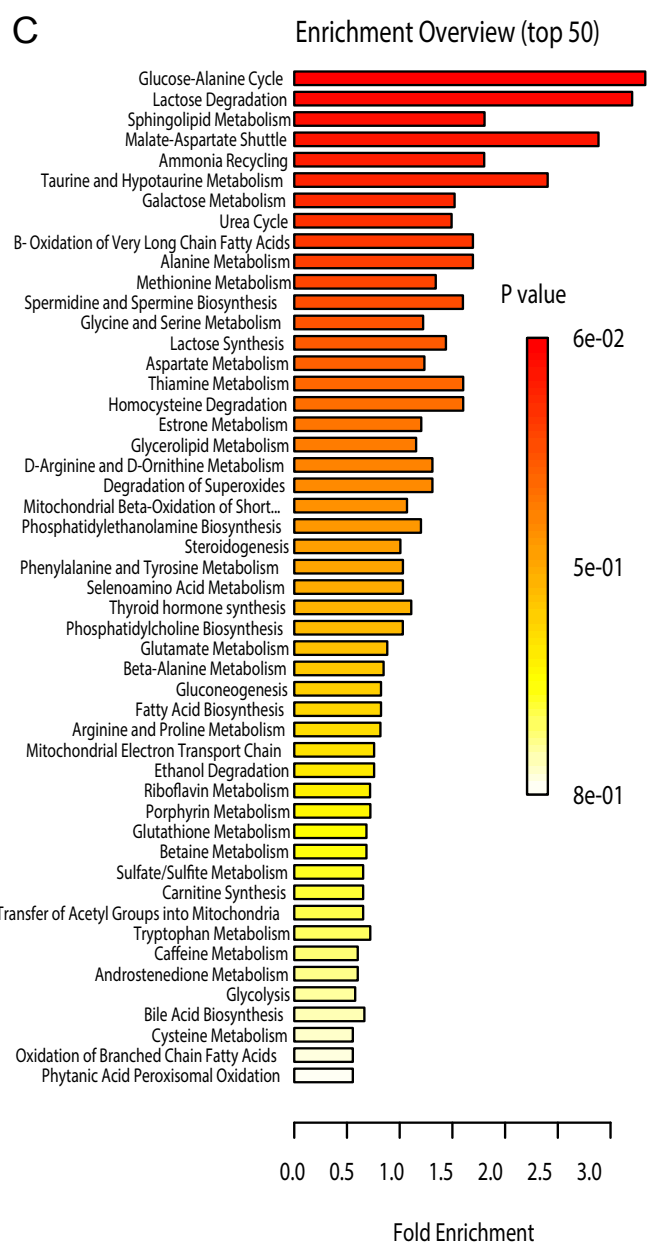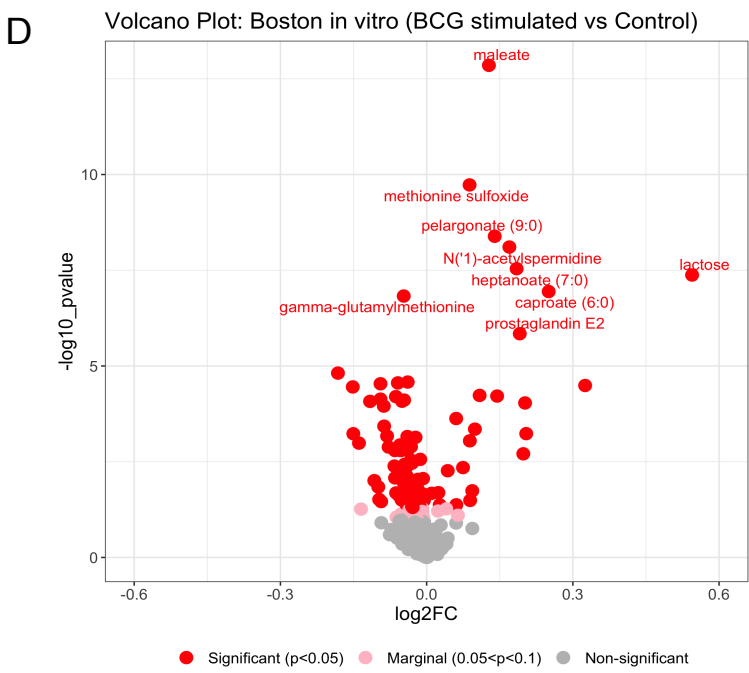

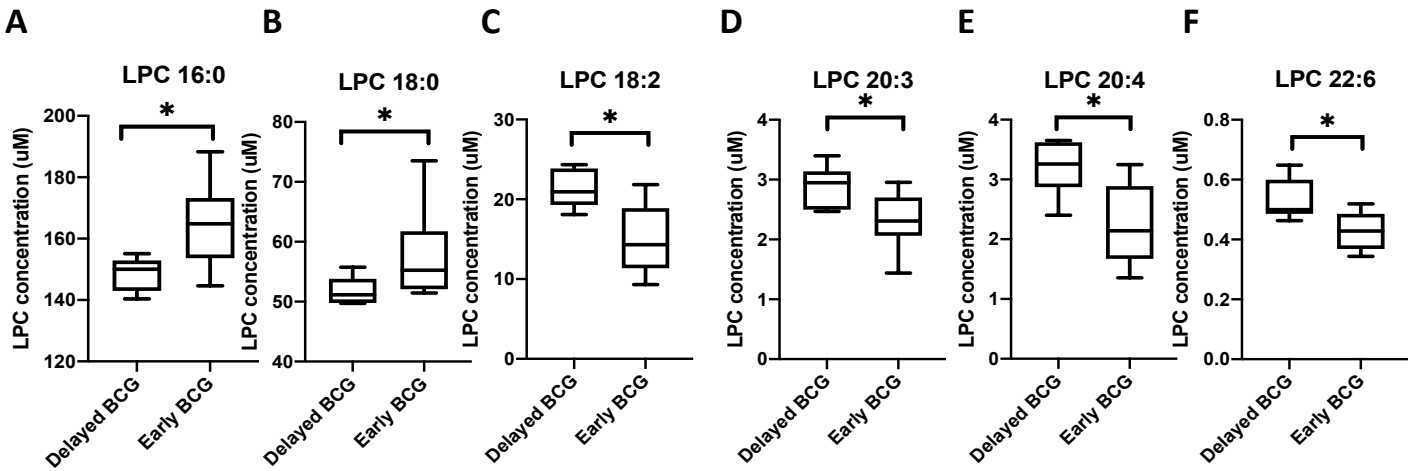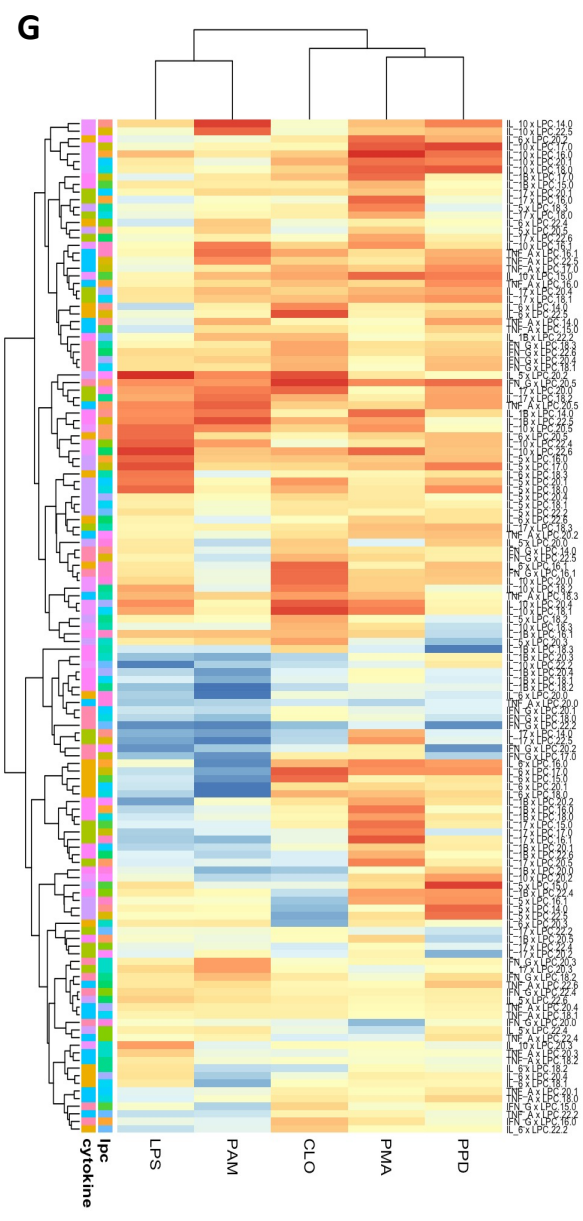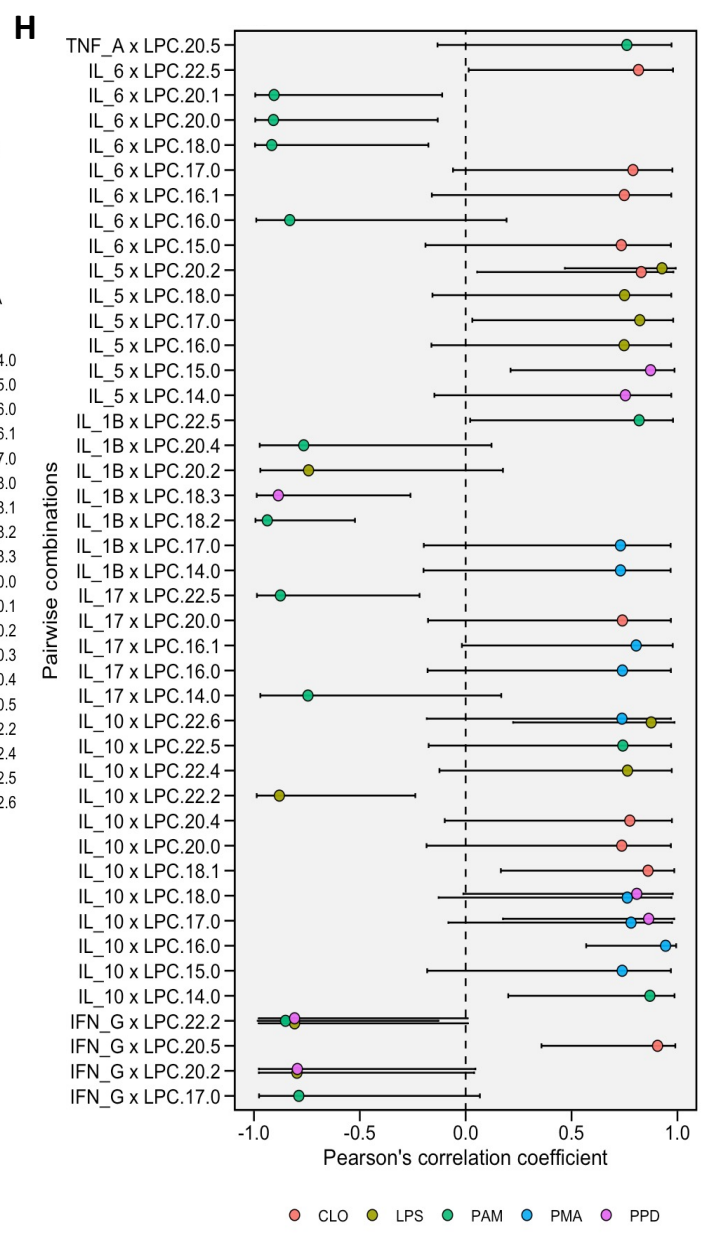

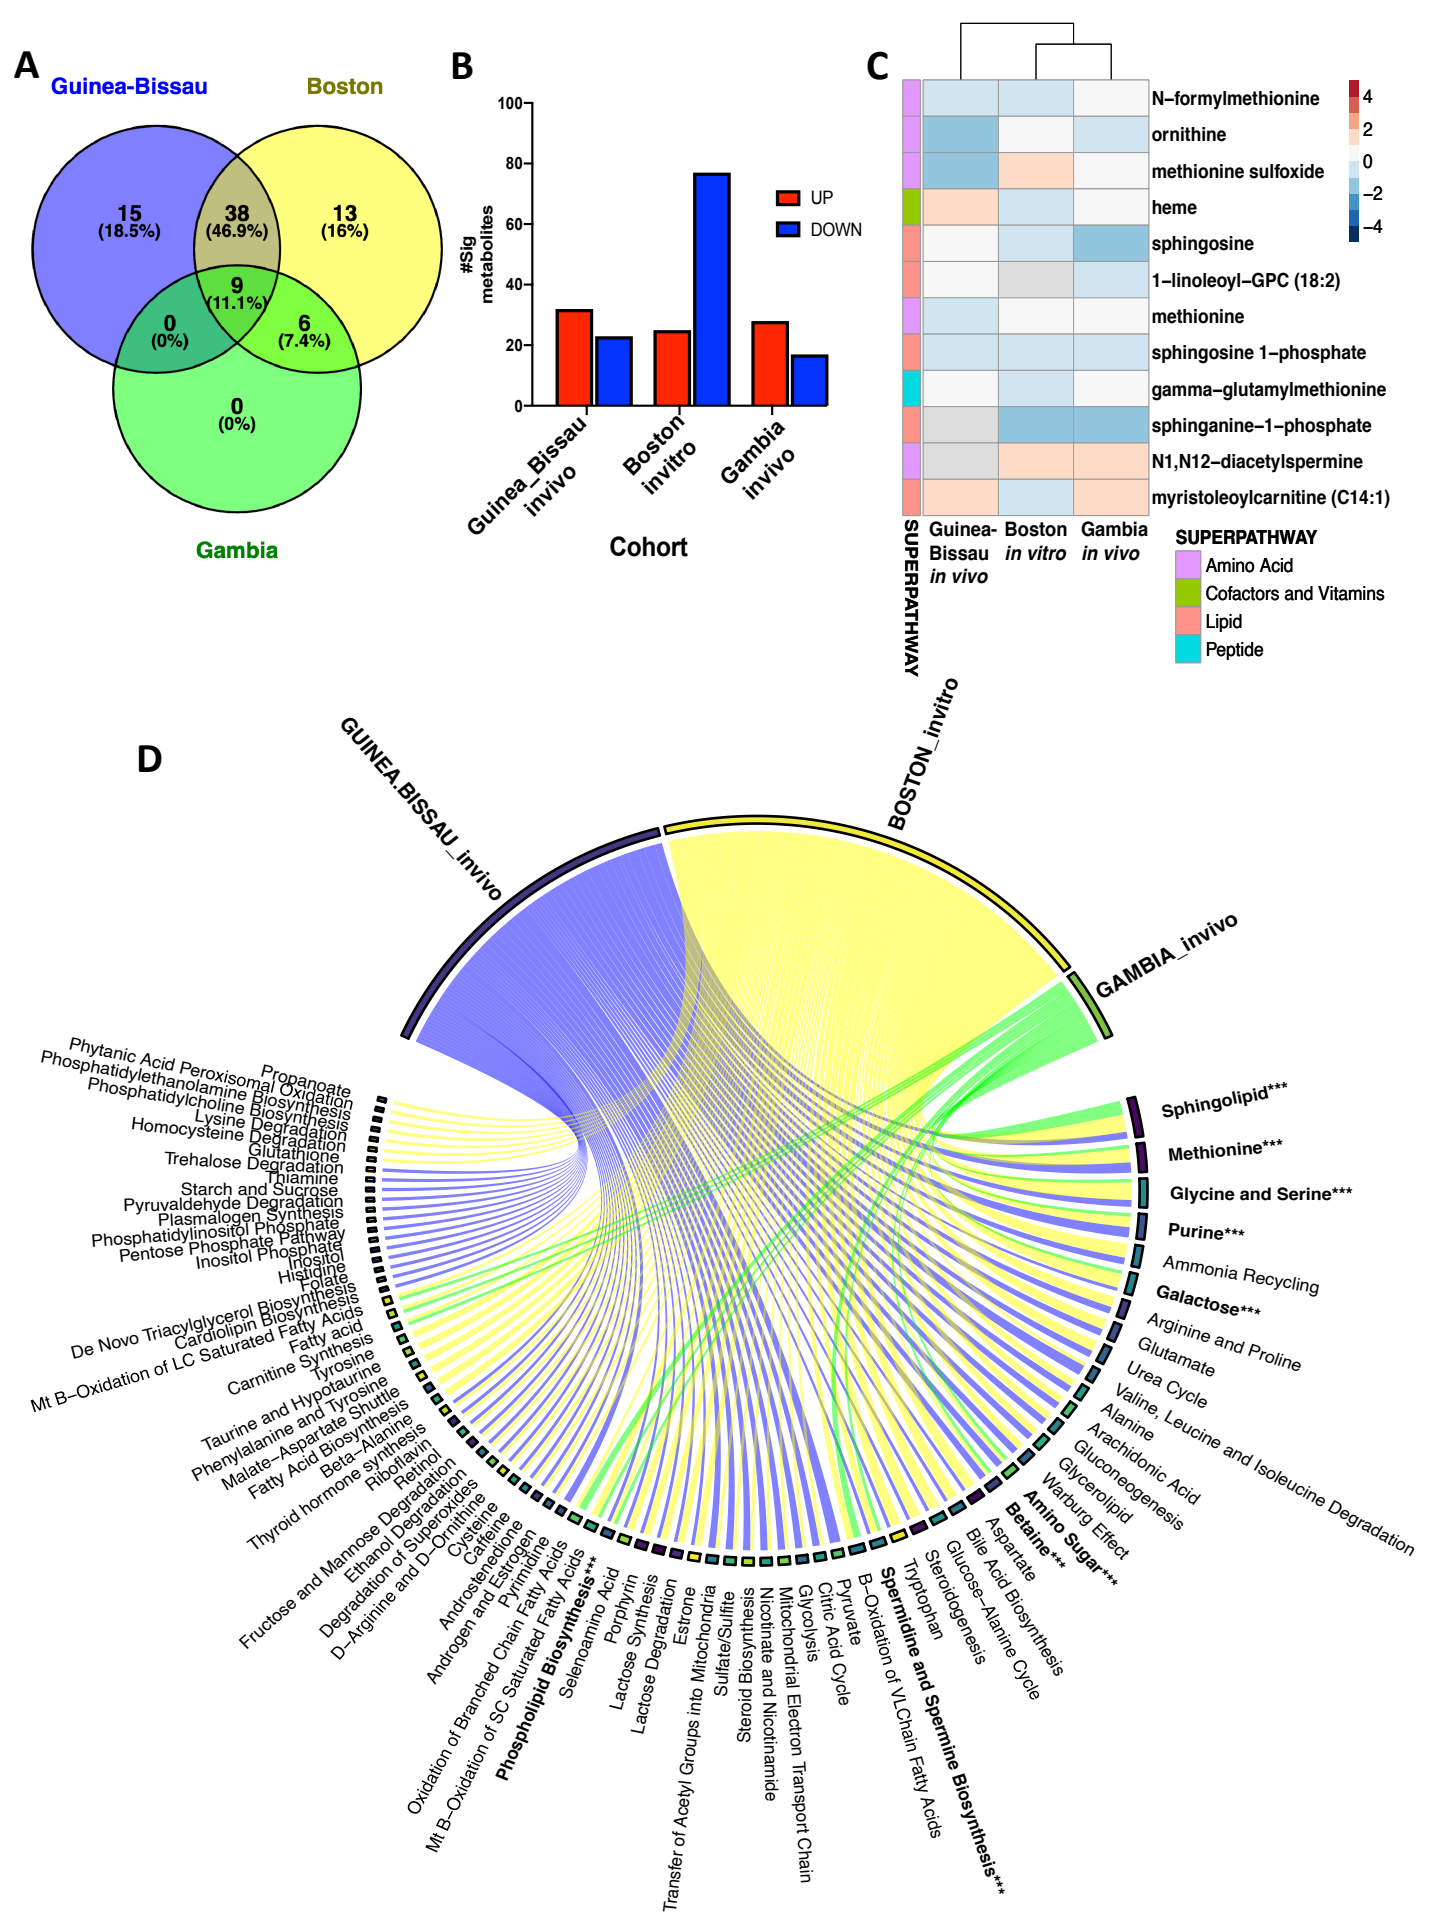

Source: https://medrxiv.org/content/10.1101/2021.12.03.21267251v1.full.pdf
