# Supplementary material for: Bacille Calmette-Guérin vaccine reprograms human neonatal lipid metabolism in vitro and in vivo
Source: bioRxiv or medRxiv preprint supplement (doi:10.1101/2021.12.03.21267251), 2021-12-05
Supplement: Supplementary file [file media-1.pdf]

**Bacille Calmette-Guérin  
vaccine reprograms  
human neonatal lipid  
metabolism  
*in vivo and in vitro***

**Supplementary Figures**

## A *In vivo* Guinea Bissau sampling procedures

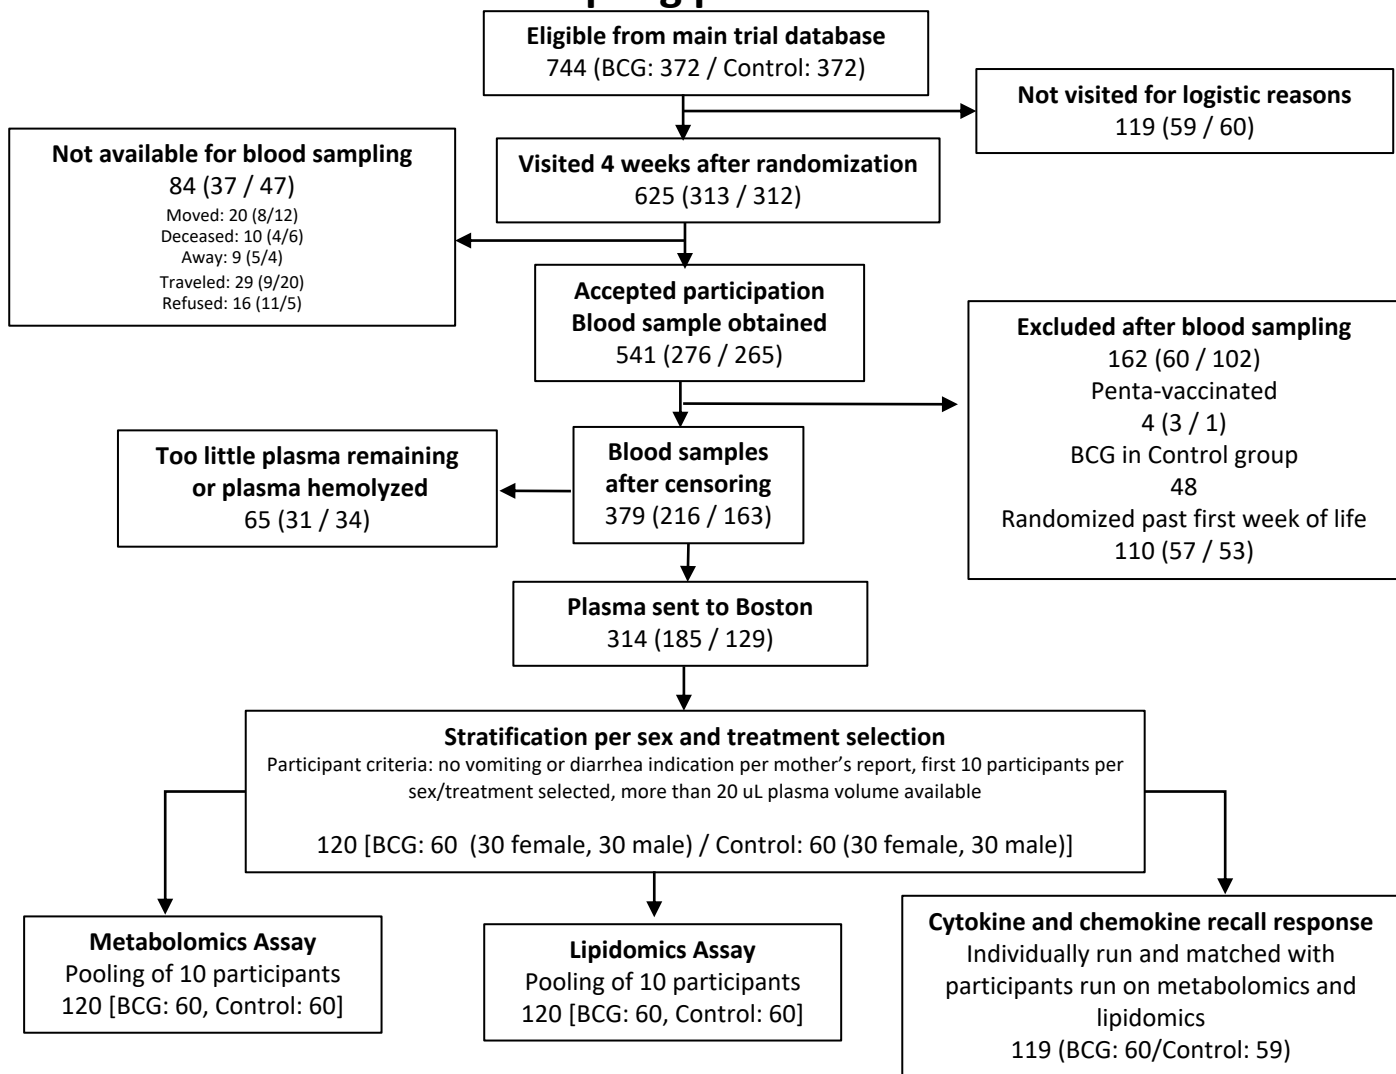

## B *In vitro* Boston sampling procedures

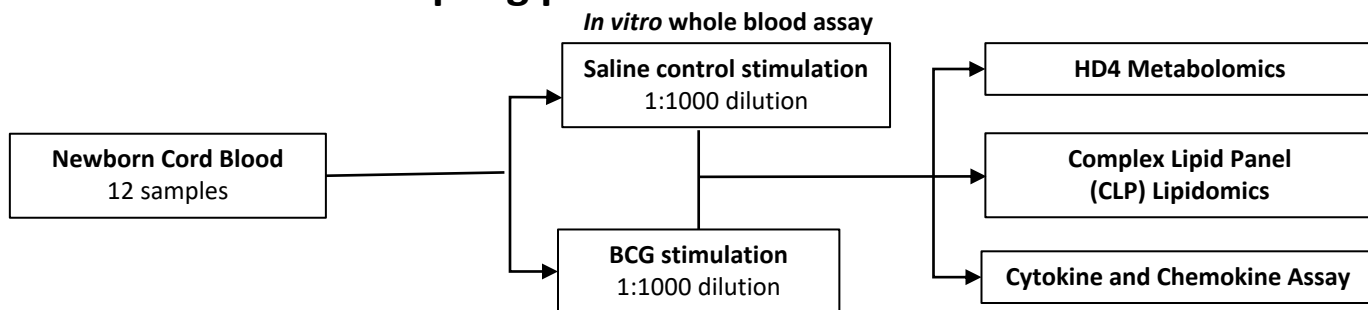

## C Validation Gambia sampling procedures

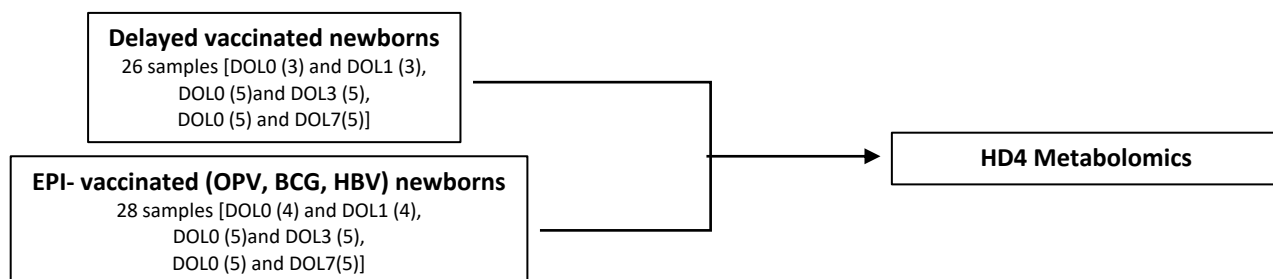

Figure S1. Flow chart of individuals with plasma samples analyzed in the study.

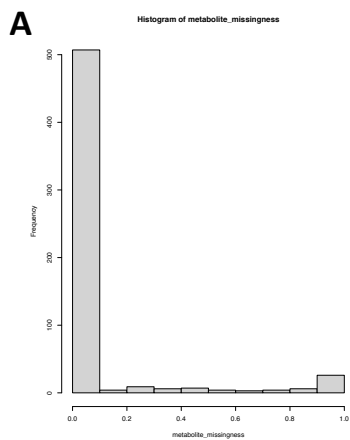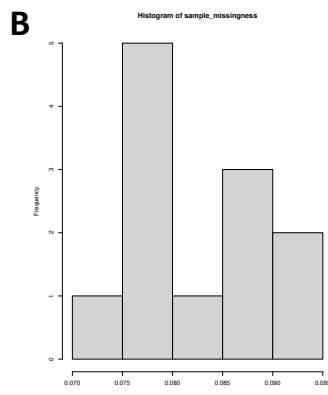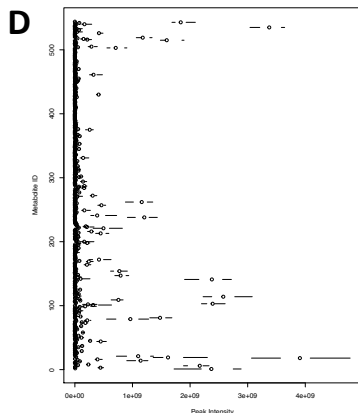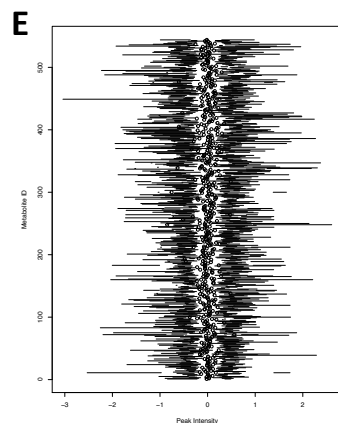

**C** Quality control/assurance summary for *in vivo* Guinea-Bissau cohort

|                                                                |     |
|----------------------------------------------------------------|-----|
| # Metabolites detected                                         | 674 |
| # Metabolites with missing values                              | 23  |
| # Metabolites with IQR=0                                       | 9   |
| # Metabolites passed QC/QA                                     | 642 |
| # Xenobiotic metabolites                                       | 98  |
| # Metabolites included in analysis (after xenobiotics removal) | 544 |

| Guinea-Bissau <i>in vivo</i> cohort | % missing values per metabolite | % missing values per sample |
|-------------------------------------|---------------------------------|-----------------------------|
| Min                                 | 0                               | 0.07292                     |
| 1st Quartile                        | 0                               | 0.07812                     |
| Median                              | 0                               | 0.0816                      |
| Mean                                | 0.08261                         | 0.0261                      |
| 3rd Quartile                        | 0                               | 0.08724                     |
| Max                                 | 1                               | 0.09201                     |

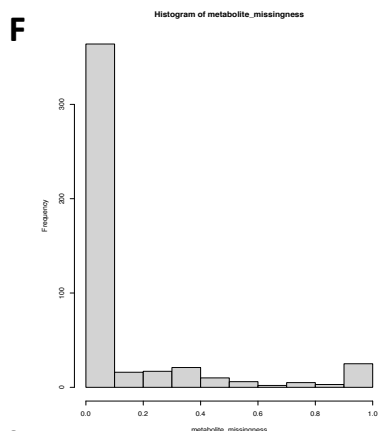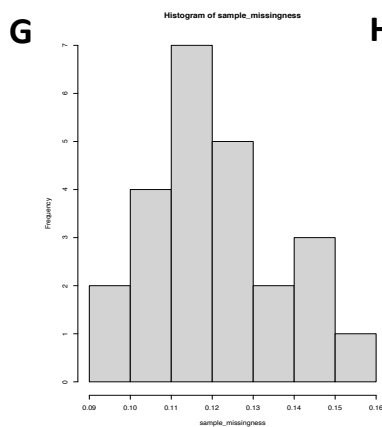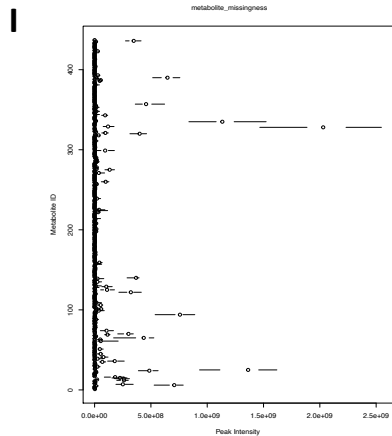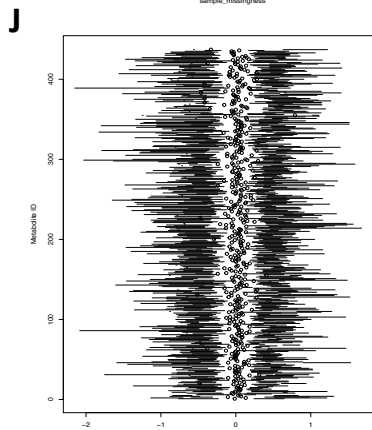

**H** Quality control/assurance summary for Boston *in vitro*

|                                                                |     |
|----------------------------------------------------------------|-----|
| # Metabolites detected                                         | 568 |
| # Metabolites with missing values                              | 17  |
| # Metabolites with IQR=0                                       | 15  |
| # Metabolites passed QC/QA                                     | 536 |
| # Xenobiotic metabolites                                       | 99  |
| # Metabolites included in analysis (after xenobiotics removal) | 437 |

| Boston <i>in vitro</i> cohort | % missing values per metabolite | % missing values per sample |
|-------------------------------|---------------------------------|-----------------------------|
| Min                           | 0                               | 0.09382                     |
| 1st Quartile                  | 0                               | 0.1194                      |
| Median                        | 0                               | 0.1194                      |
| Mean                          | 0.11976                         | 0.11976                     |
| 3rd Quartile                  | 0.08333                         | 0.1274                      |
| Max                           | 1                               | 0.15139                     |

**Figure S2: Summary of quality control and assurance method for metabolomics Guinea-Bissau (*in vivo*, upper panel) and Boston (*in vitro*, lower panel) datasets.**

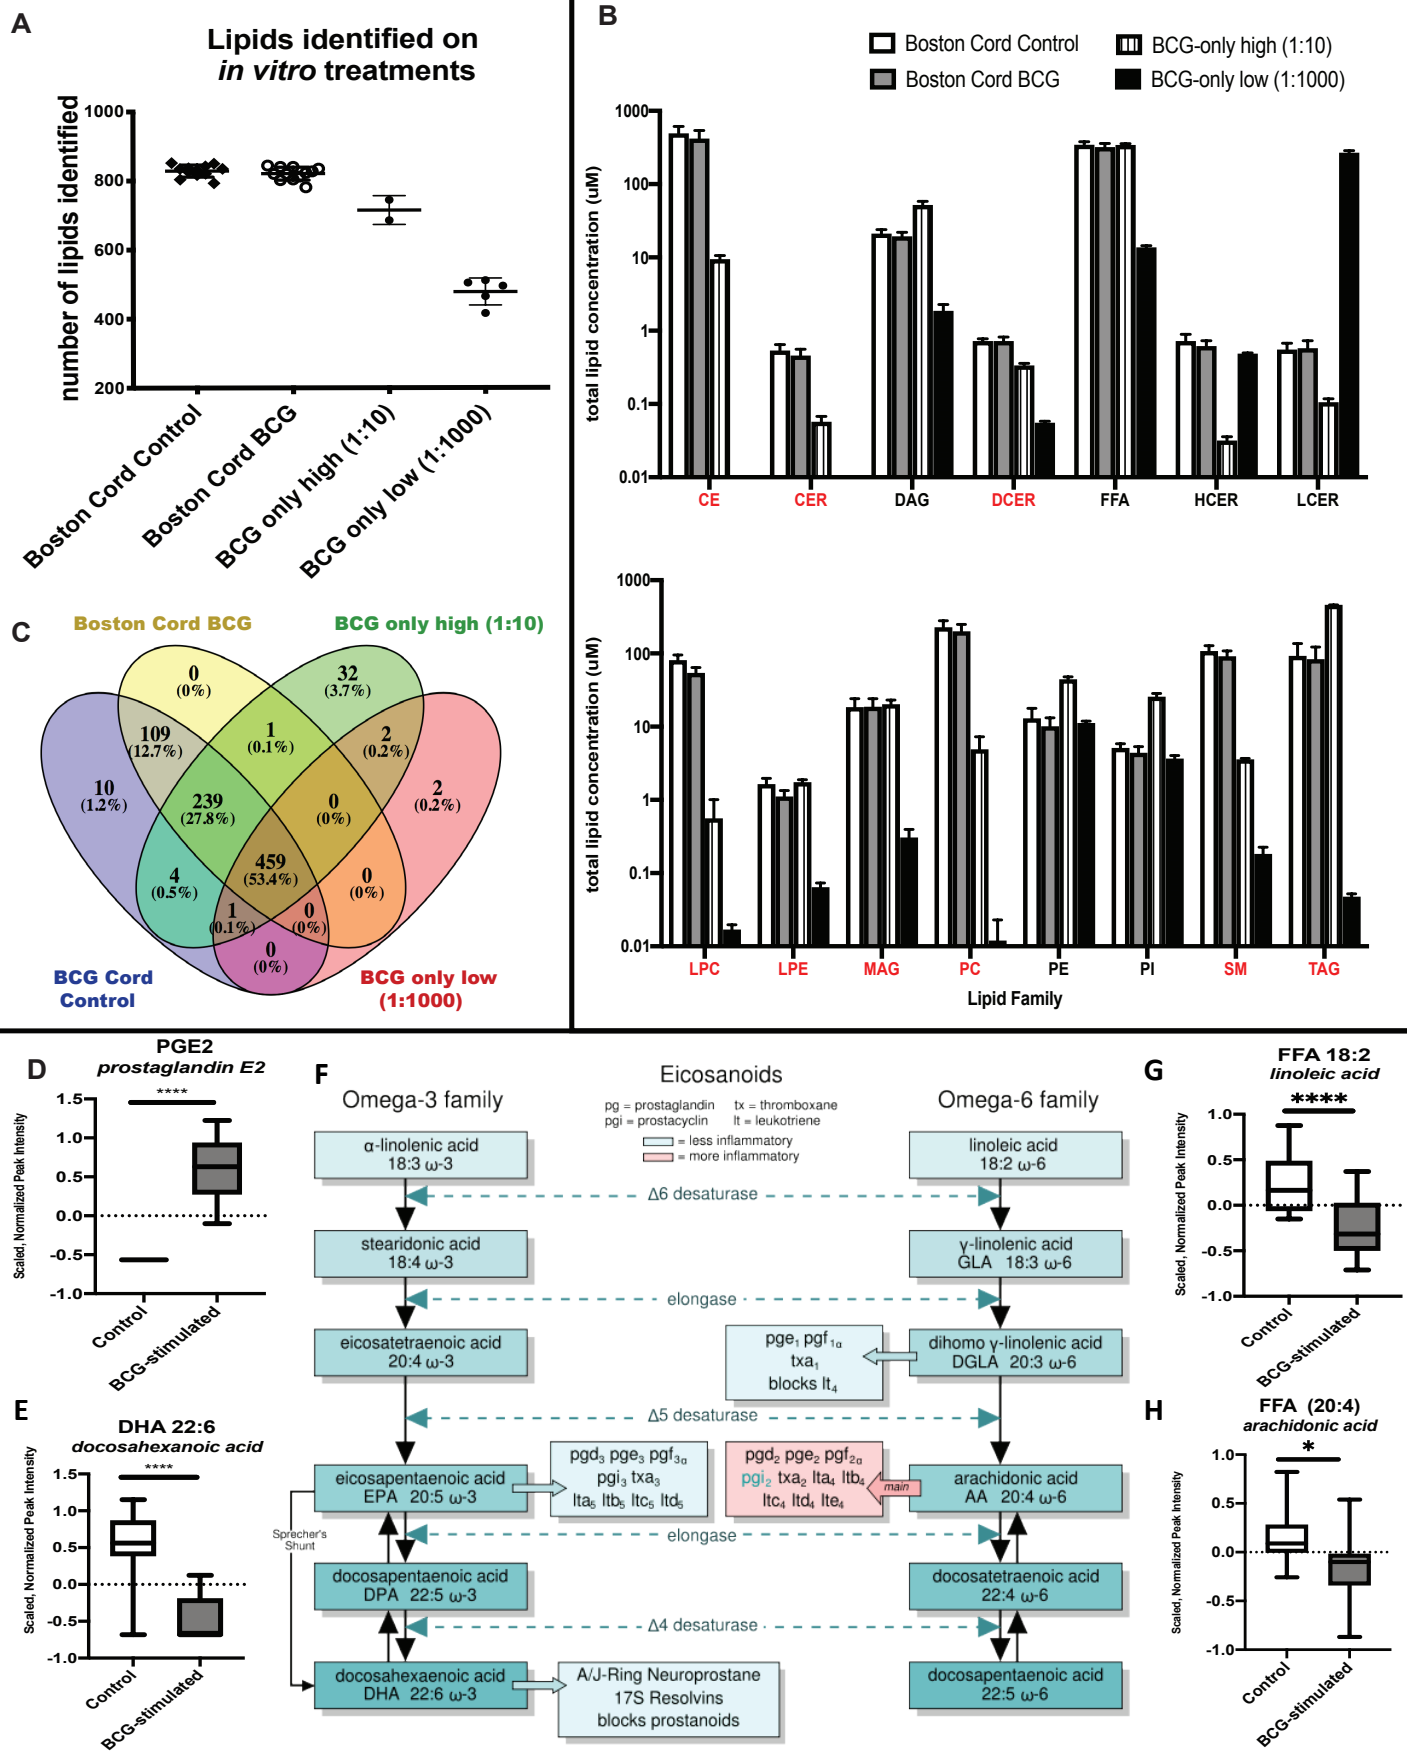

**Figure S3: Addition of BCG to human newborn cord blood *in vitro* perturbs the eicosanoid lipid pathway.**

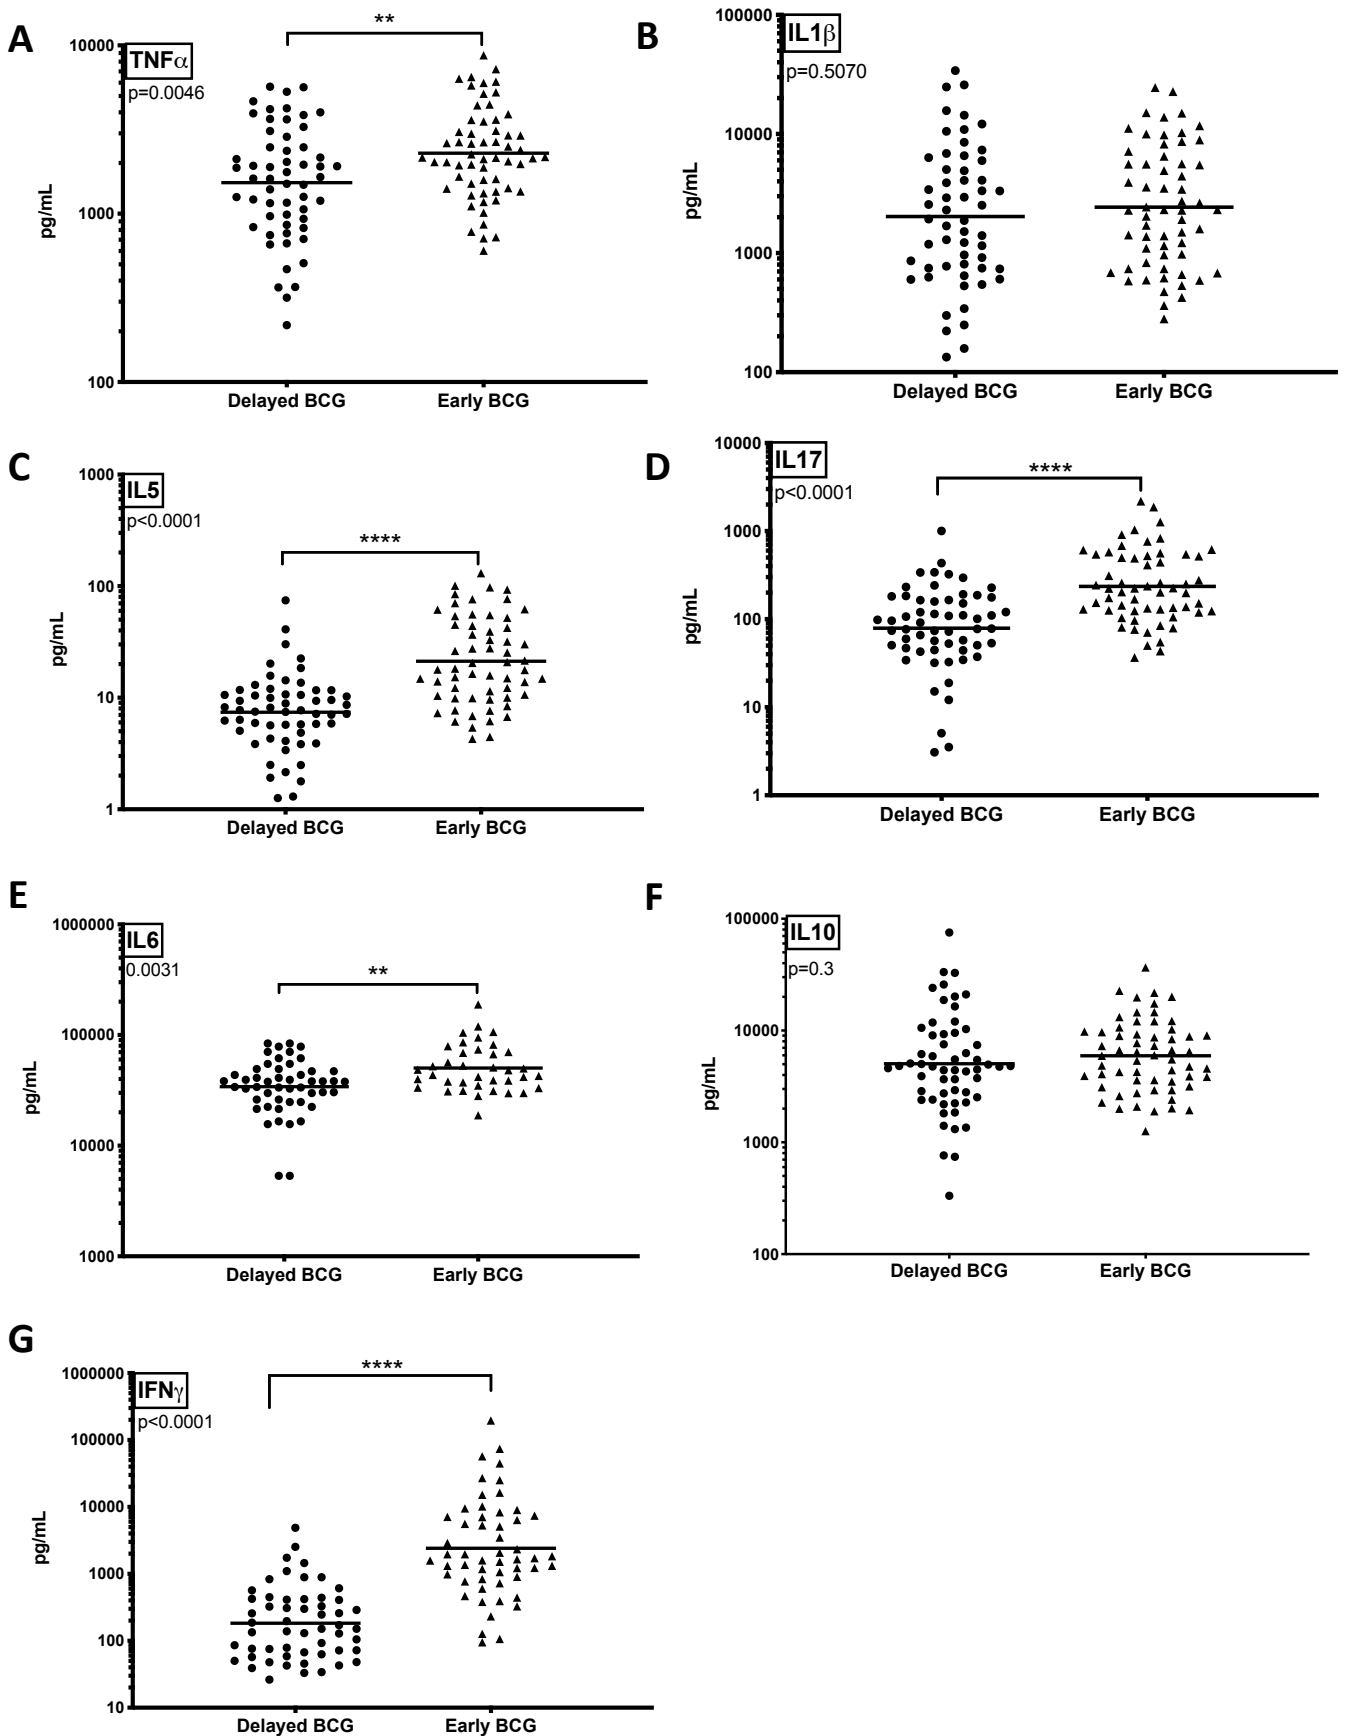

**Figure S4: Early BCG group demonstrated enhanced cytokine production upon PPD re-stimulation of heparinized blood collected 4 weeks post BCG vaccination.**

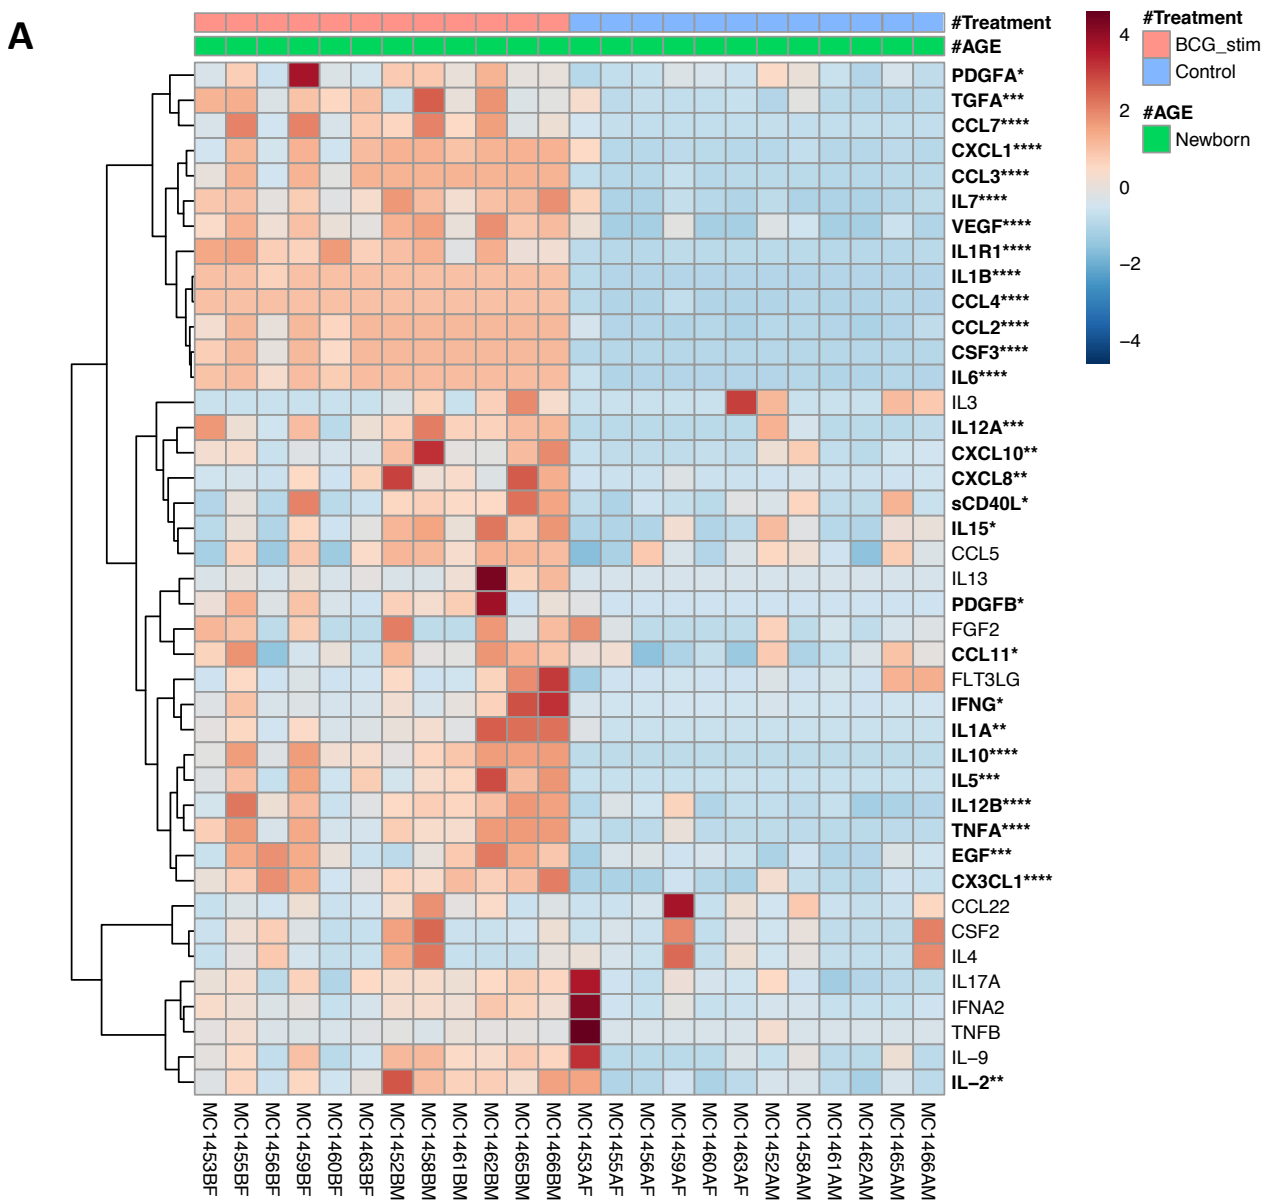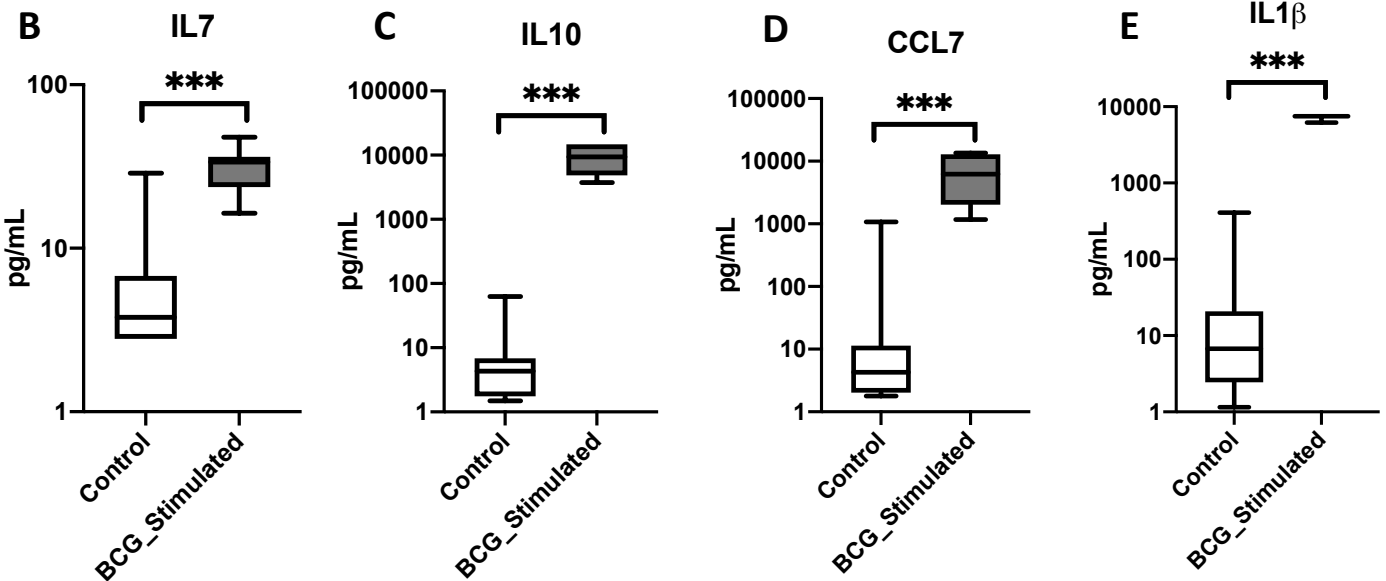

**Figure S5: BCG-induced cytokine and chemokine production in Boston human newborn cord blood *in vitro*.**
